# Supplementary material for: Synthesis of Novel 1,4-Naphthoquinones Possessing Indole Scaffolds Using In(OTf)3 in Solvent-Free Conditions
Source: MDPI journal article supplement (doi:10.3390/molecules23081954), 2018-08-06
Supplement: s1 [file s1]

# Synthesis of novel 1,4-naphthoquinones possessing indole scaffolds using $\text{In}(\text{OTf})_3$ under solvent-free conditions

Xiaojuan Yang<sup>1</sup> and Liqiang Wu<sup>2,\*</sup>

<sup>1</sup> College of Chemistry and Chemical Engineering, Xinxiang University, Xinxiang, Henan 453003, China; yangxiaojuan2005@126.com

<sup>2</sup> School of Pharmacy, Xinxiang Medical University, Xinxiang 453003, China; wliq1974@163.com

\* Correspondence: wliq1974@163.com; Tel.: +86-373-302-9879

## Content

Copy of IR, <sup>1</sup>H NMR, <sup>13</sup>C NMR and HRMS..... 2-39

Acquisition Parameter

|             |            |                       |           |                  |           |
|-------------|------------|-----------------------|-----------|------------------|-----------|
| Source Type | ESI        | Ion Polarity          | Positive  | Set Nebulizer    | 0.3 Bar   |
| Focus       | Not active | Set Capillary         | 4500 V    | Set Dry Heater   | 180 °C    |
| Scan Begin  | 50 m/z     | Set End Plate Offset  | -500 V    | Set Dry Gas      | 4.0 l/min |
| Scan End    | 1000 m/z   | Set Collision Cell RF | 180.0 Vpp | Set Divert Valve | Waste     |

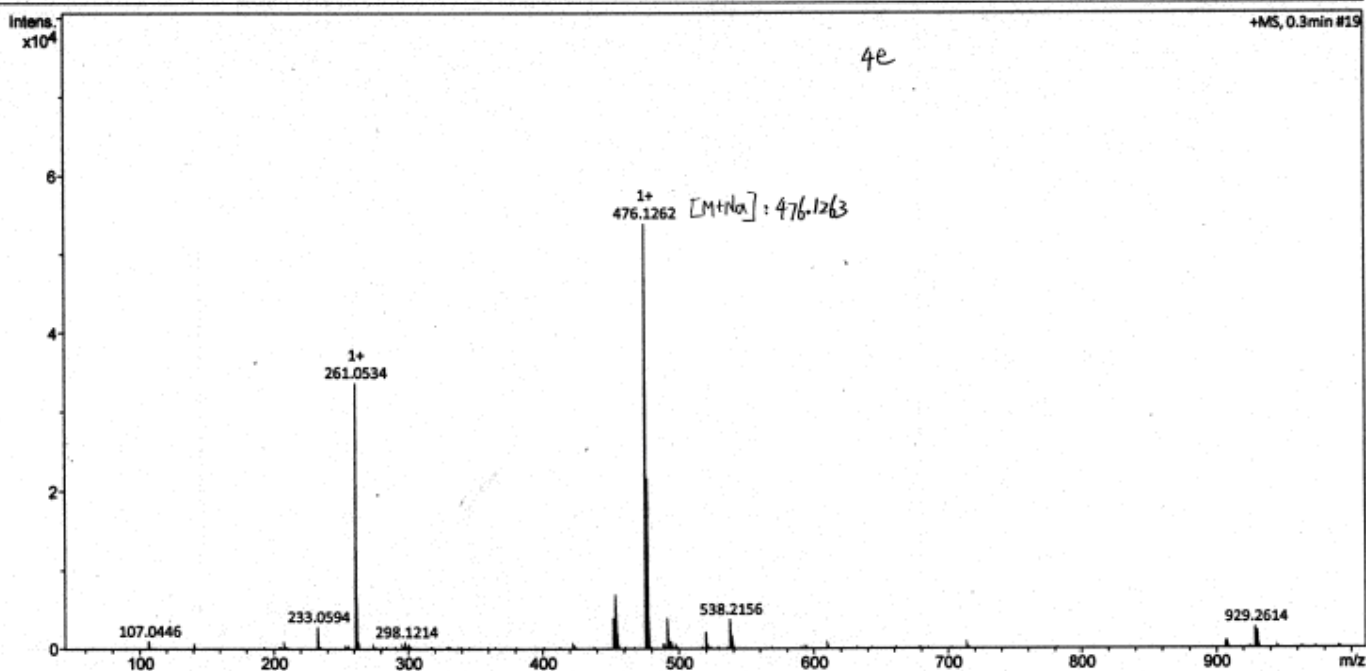

Figure S1 HRMS of 4a

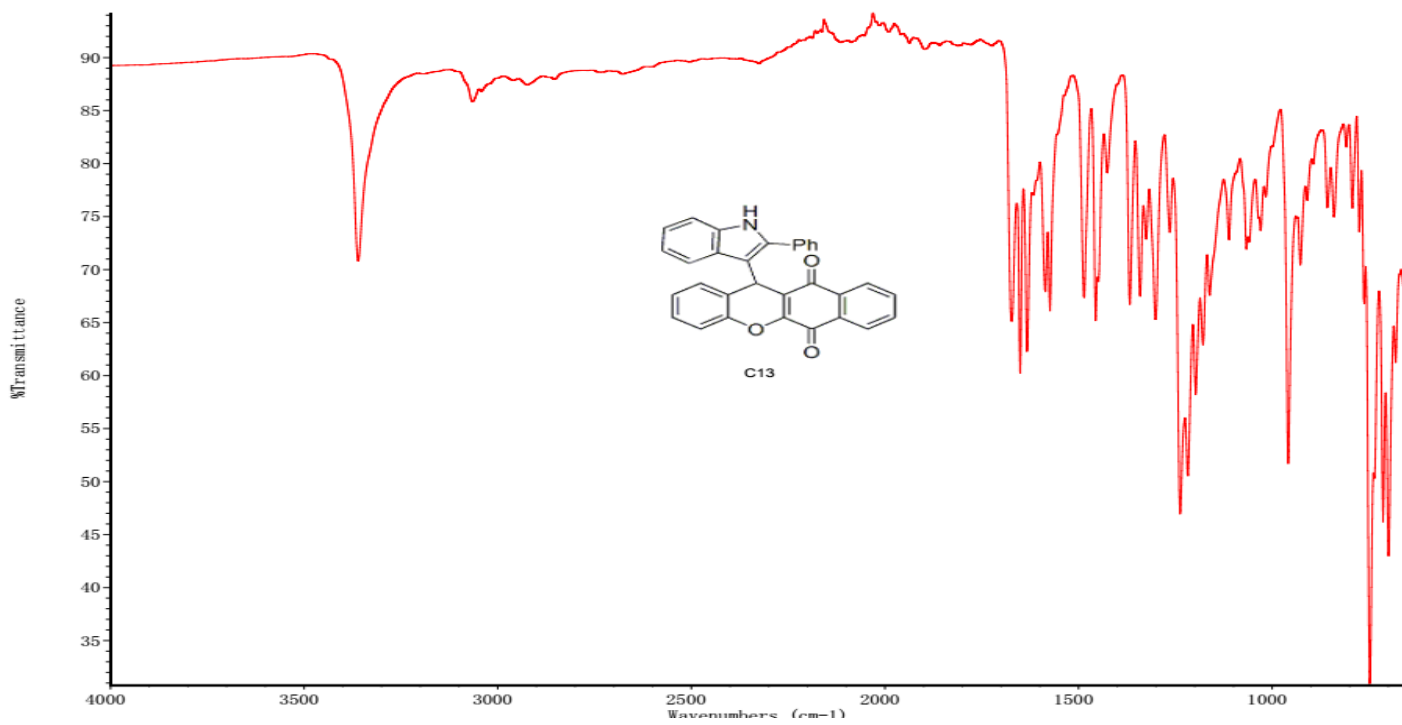

Figure S2 IR of 4a

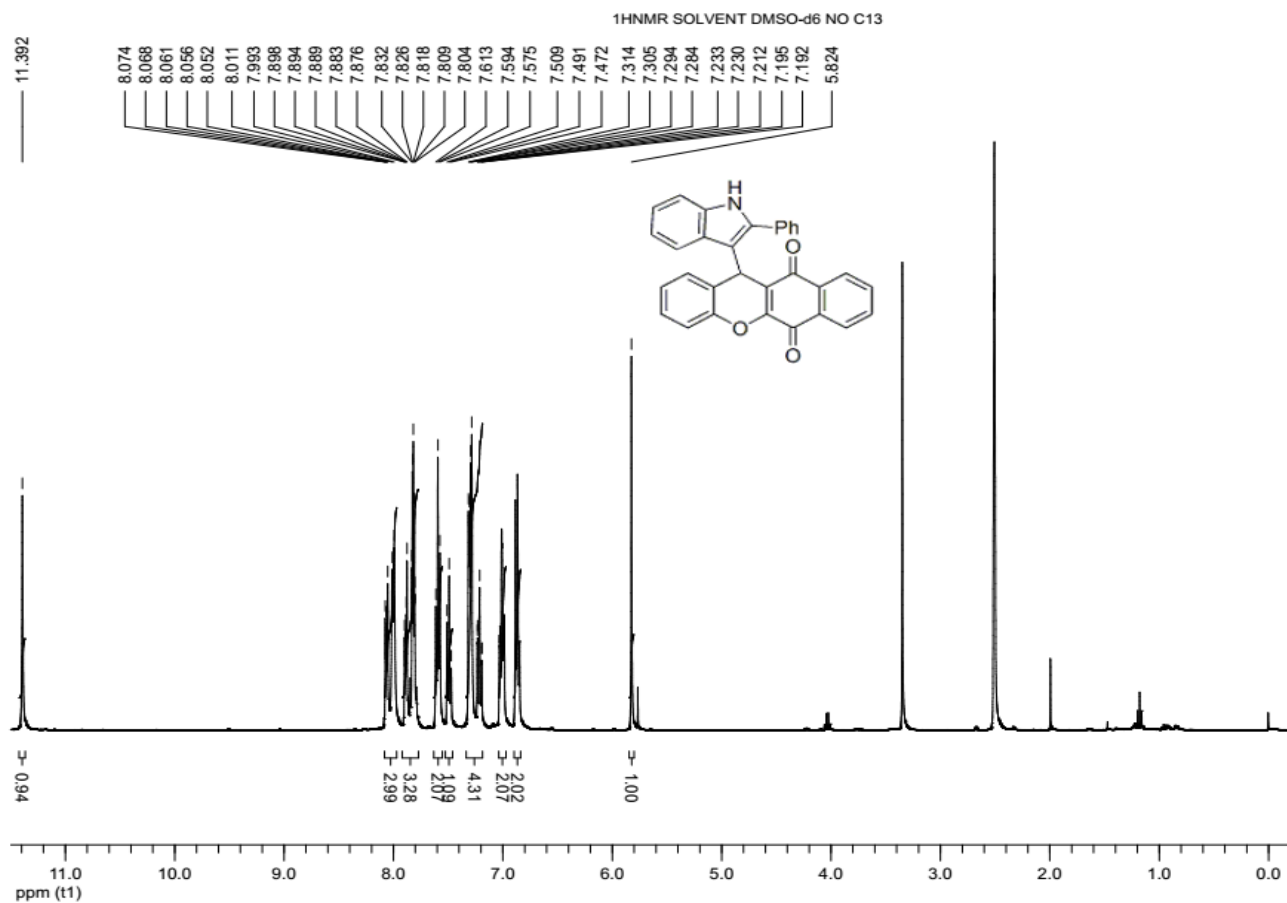

Figure S3  $^1\text{H}$  NMR of 4a

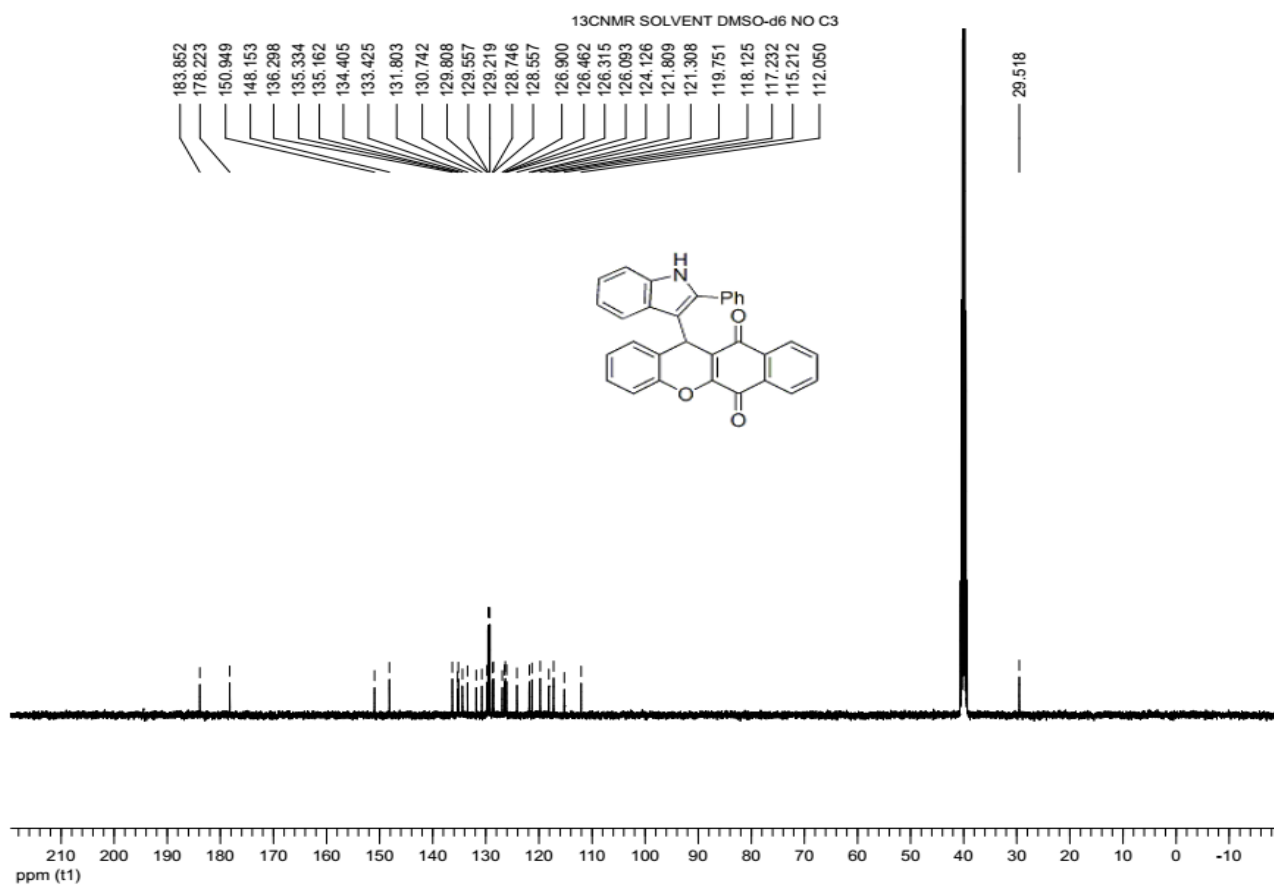

Figure S4  $^{13}\text{C}$  NMR of 4a

| Acquisition Parameter |            |                       |           |                  |           |
|-----------------------|------------|-----------------------|-----------|------------------|-----------|
| Source Type           | ESI        | Ion Polarity          | Positive  | Set Nebulizer    | 0.3 Bar   |
| Focus                 | Not active | Set Capillary         | 4500 V    | Set Dry Heater   | 180 °C    |
| Scan Begin            | 50 m/z     | Set End Plate Offset  | -500 V    | Set Dry Gas      | 4.0 l/min |
| Scan End              | 1000 m/z   | Set Collision Cell RF | 600.0 Vpp | Set Divert Valve | Waste     |

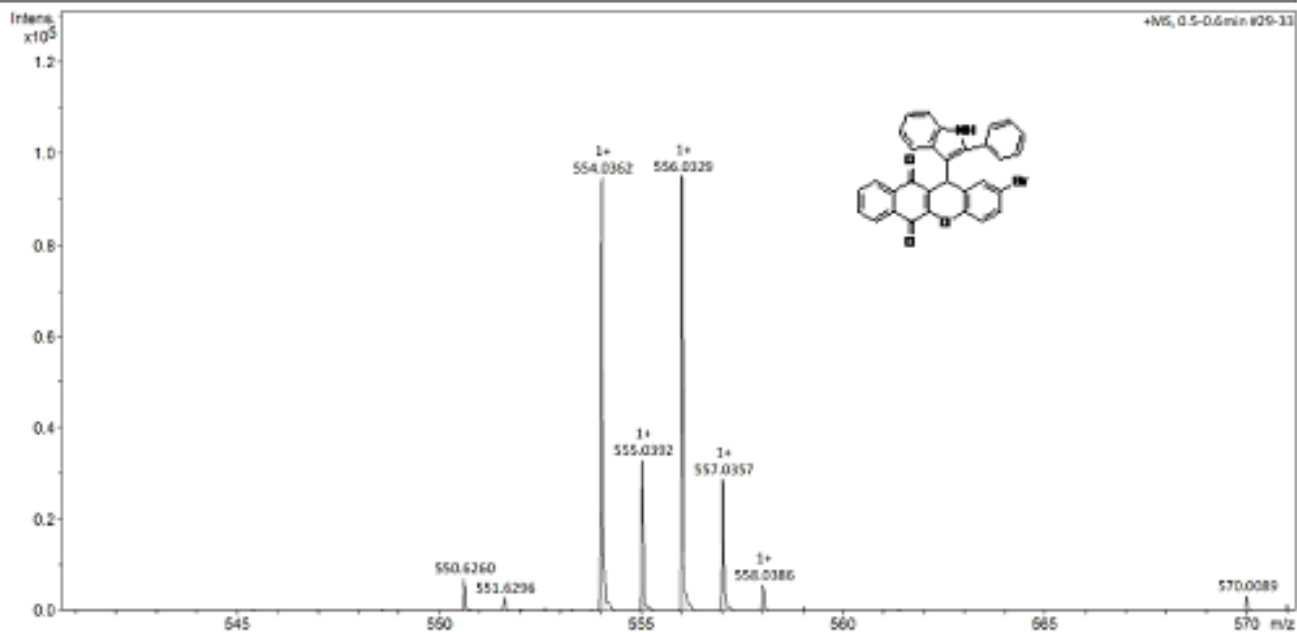

Figure S5 HRMS of 4b

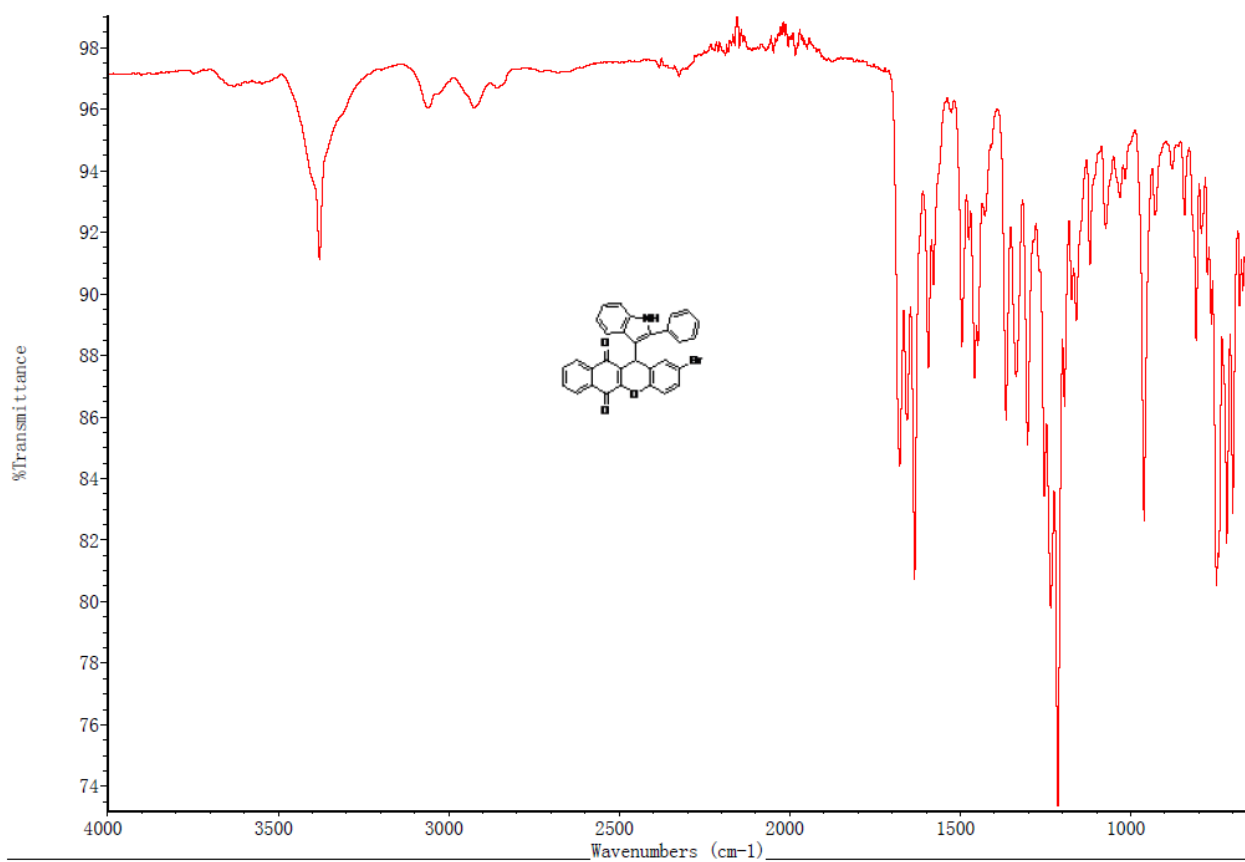

Figure S6 IR of 4b

1H NMR SOLVENT DMSO-d6 NO D1

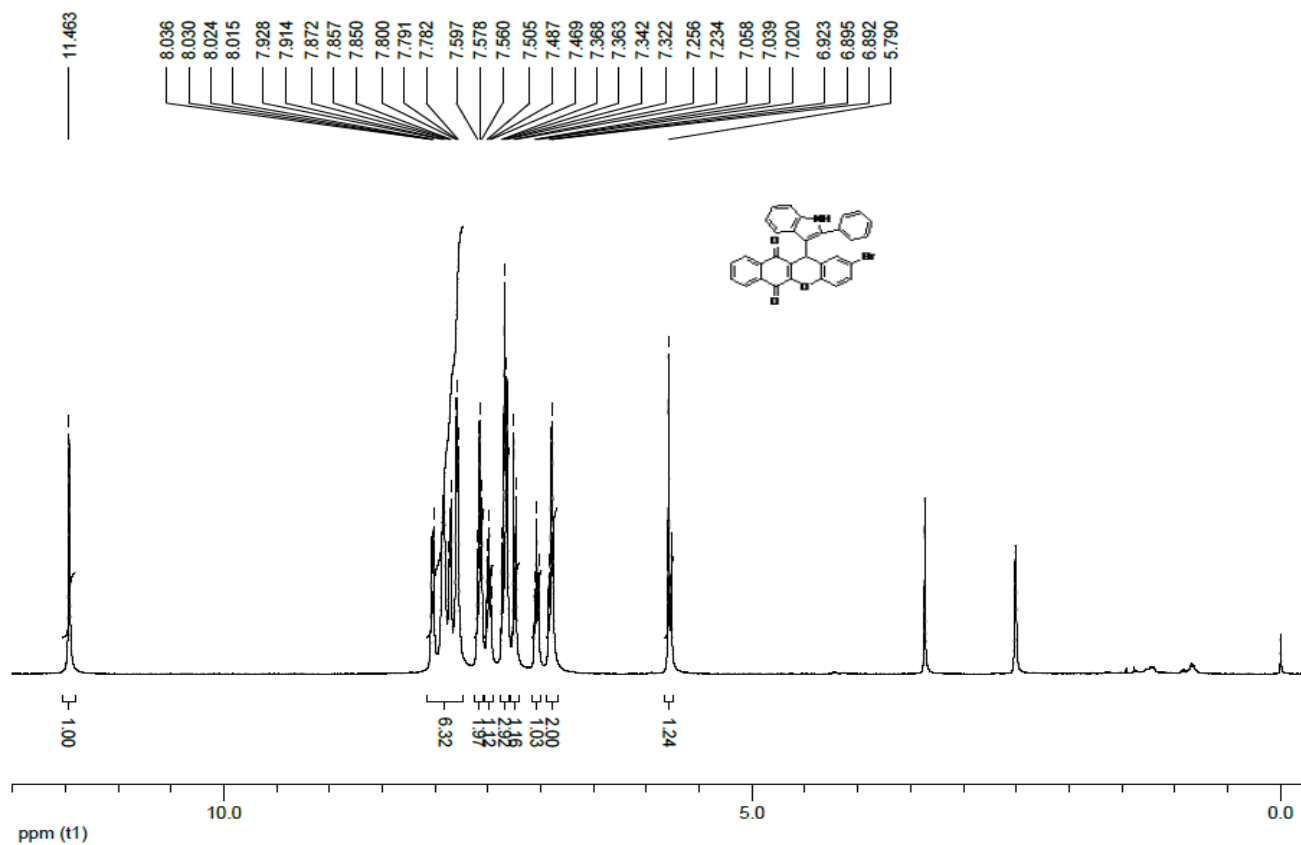

Figure S7 1H NMR of 4b

13C NMR SOLVENT DMSO-d6 NO D1

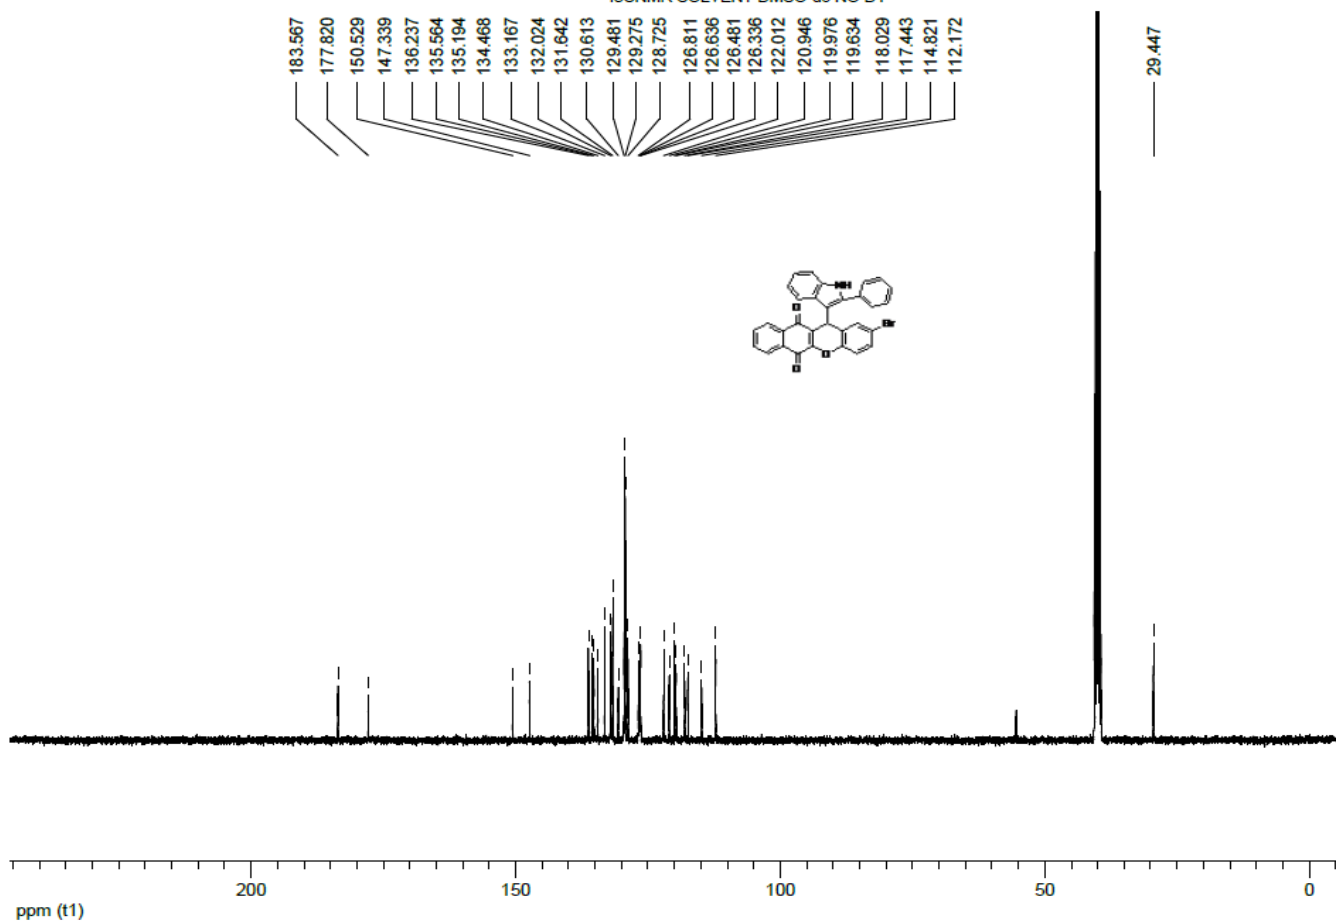

Figure S8 13C NMR of 4b

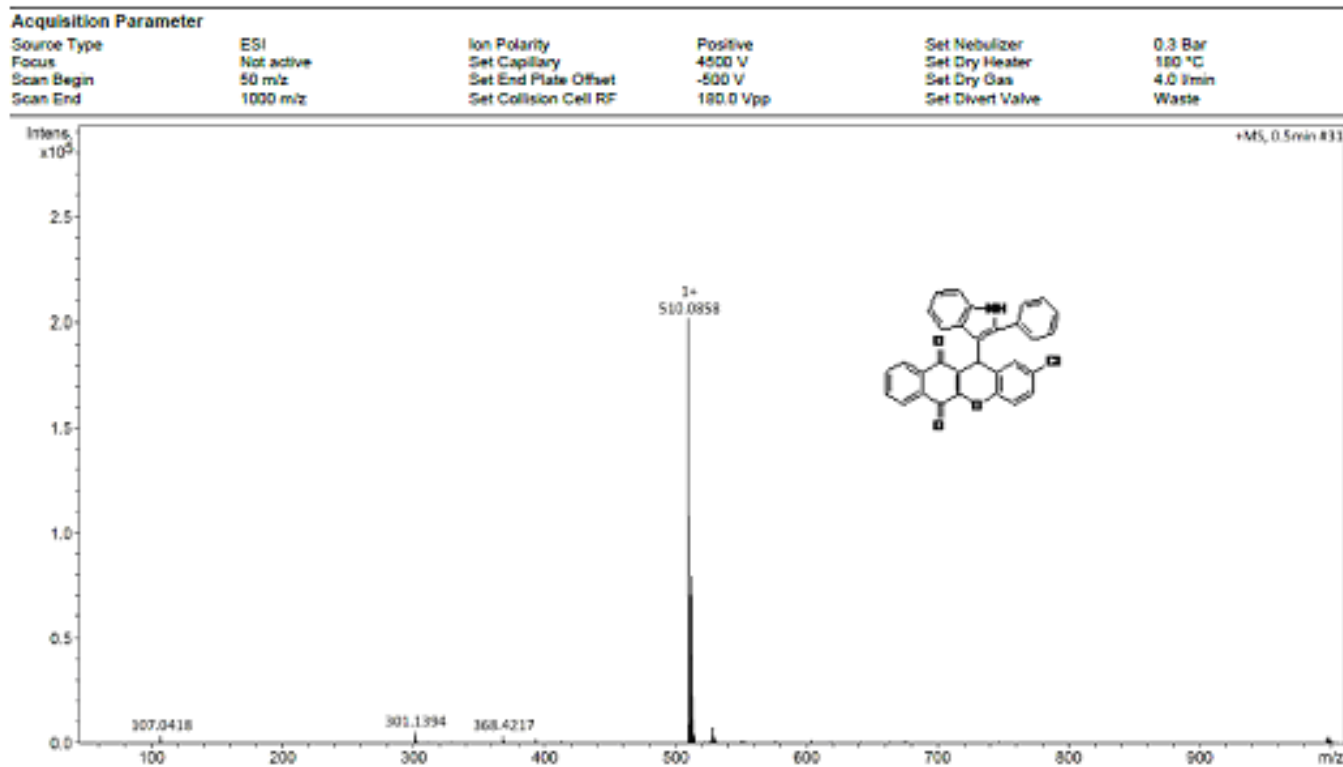

Figure S9 HRMS of 4c

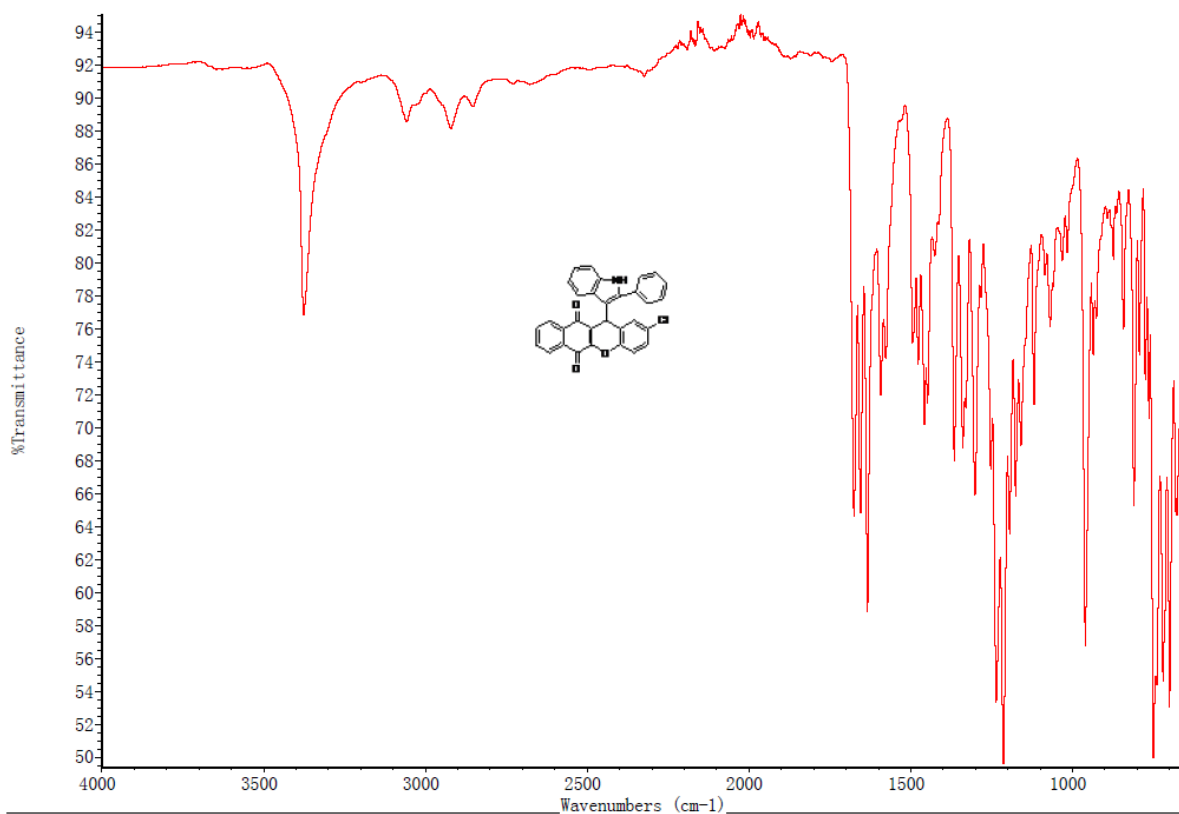

Figure S10 IR of 4c

1H NMR SOLVENT DMSO-d6 NO D2

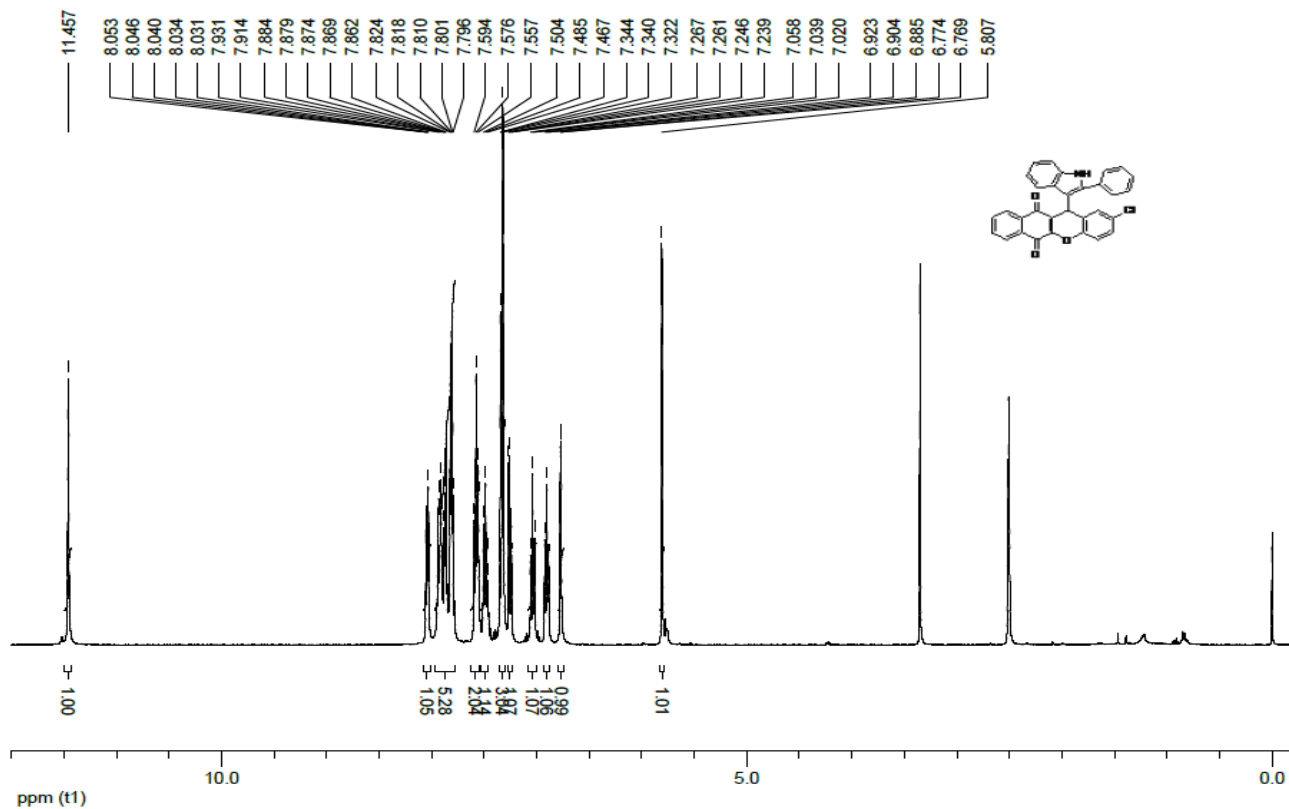

Figure S11 1H NMR of 4c

13C NMR SOLVENT DMSO-d6 NO D2

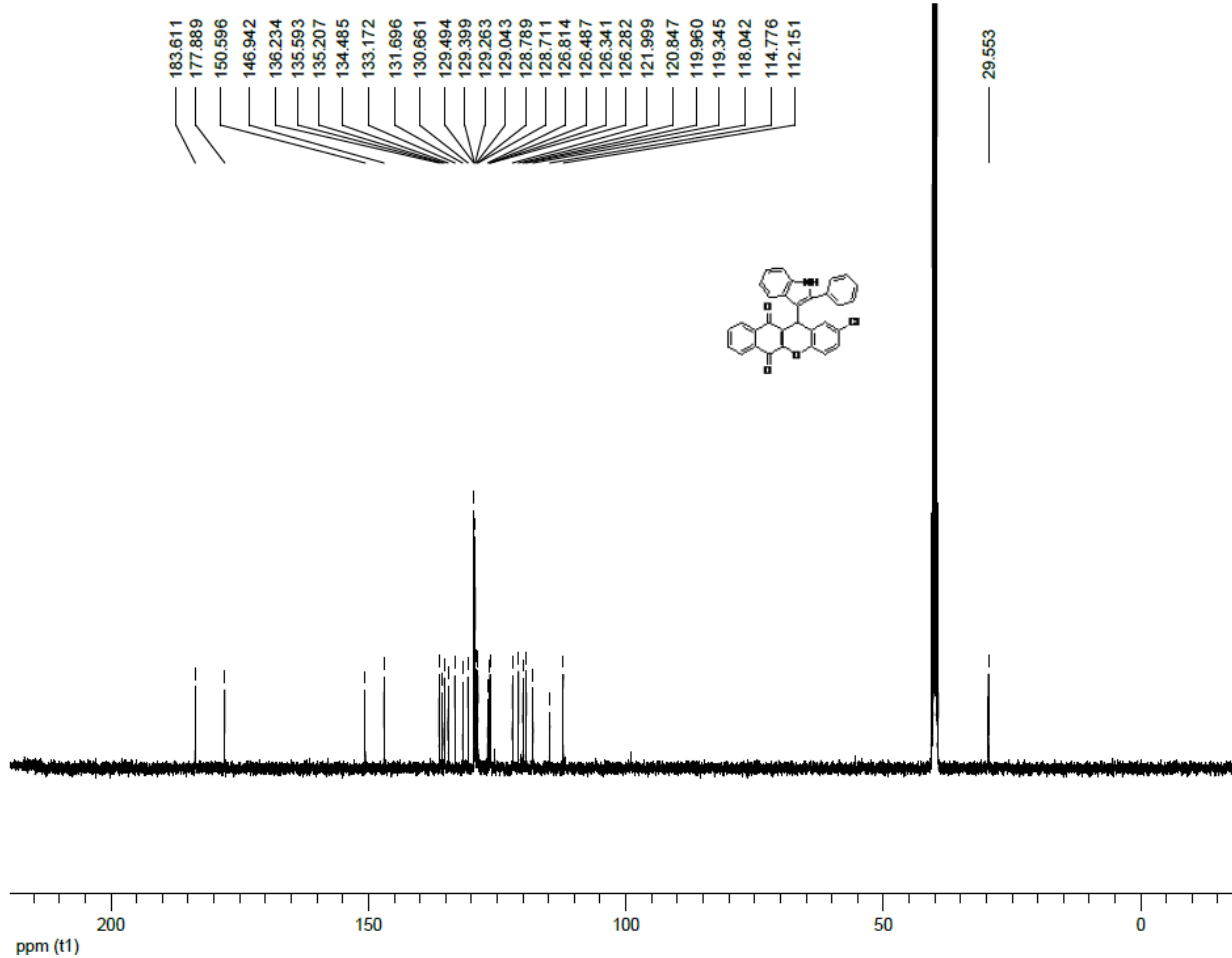

Figure S12 13C NMR of 4c

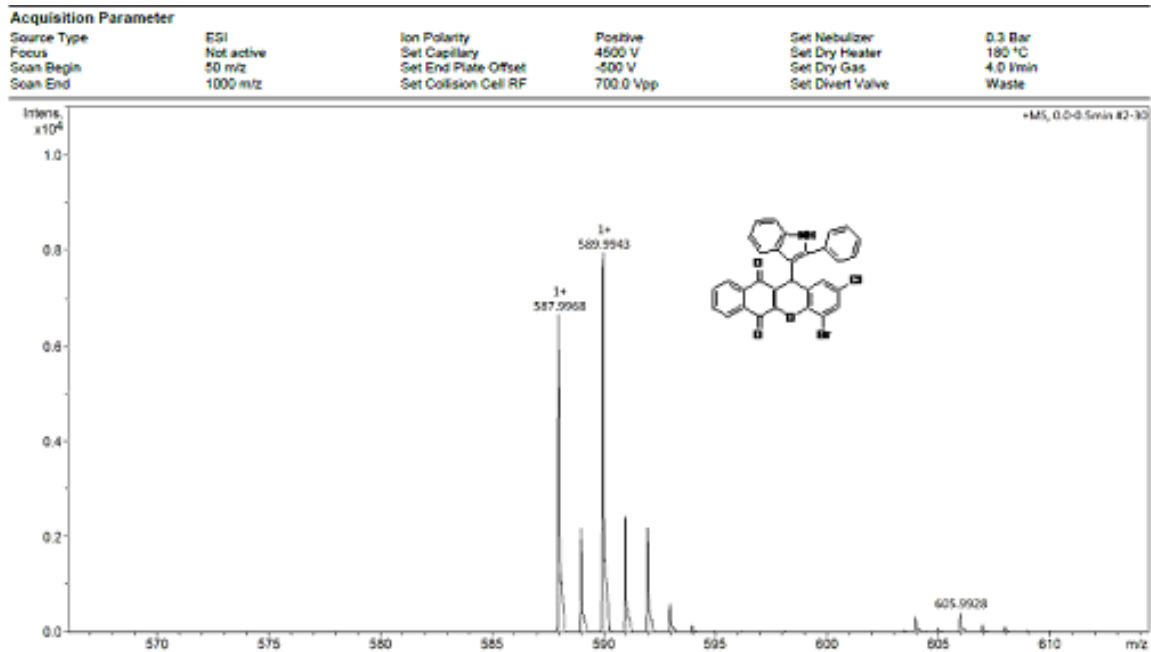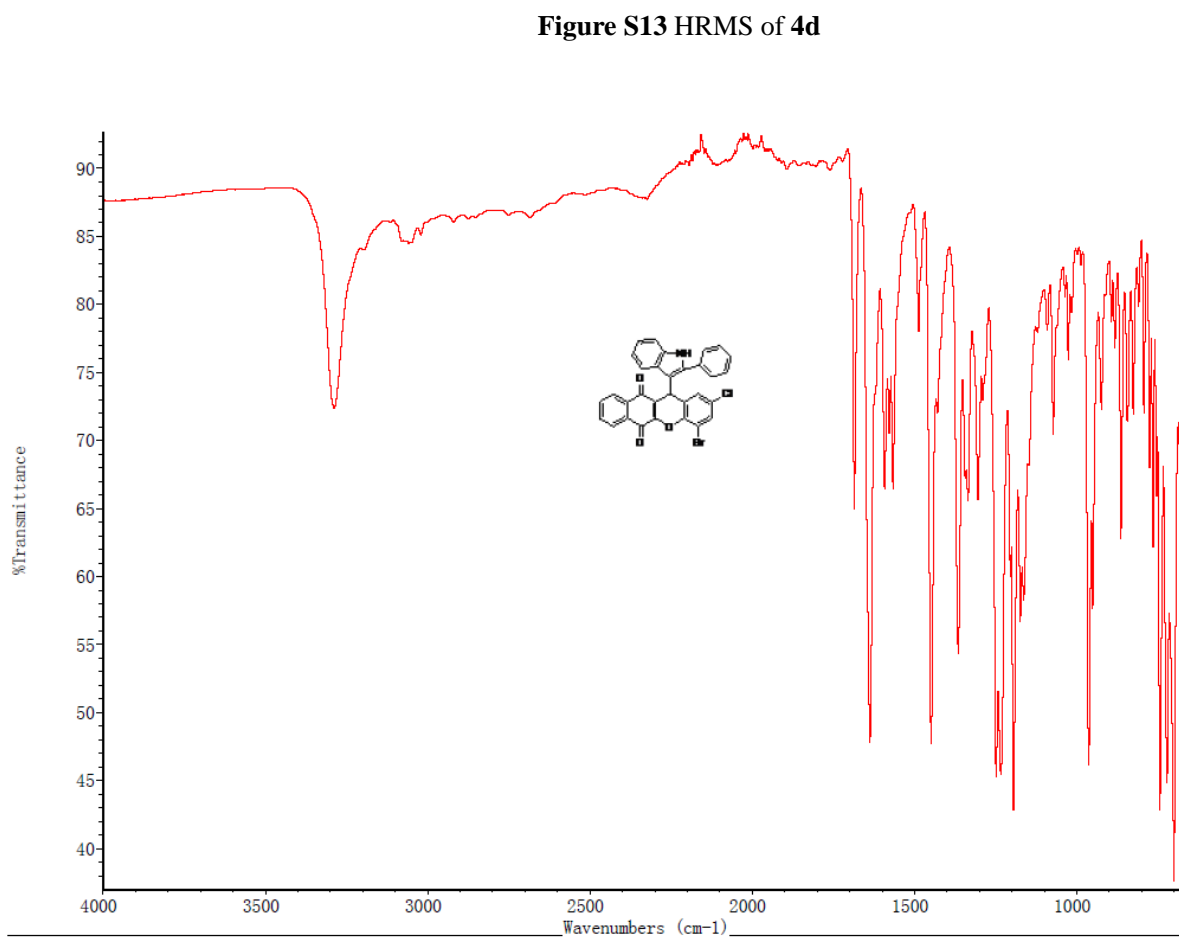



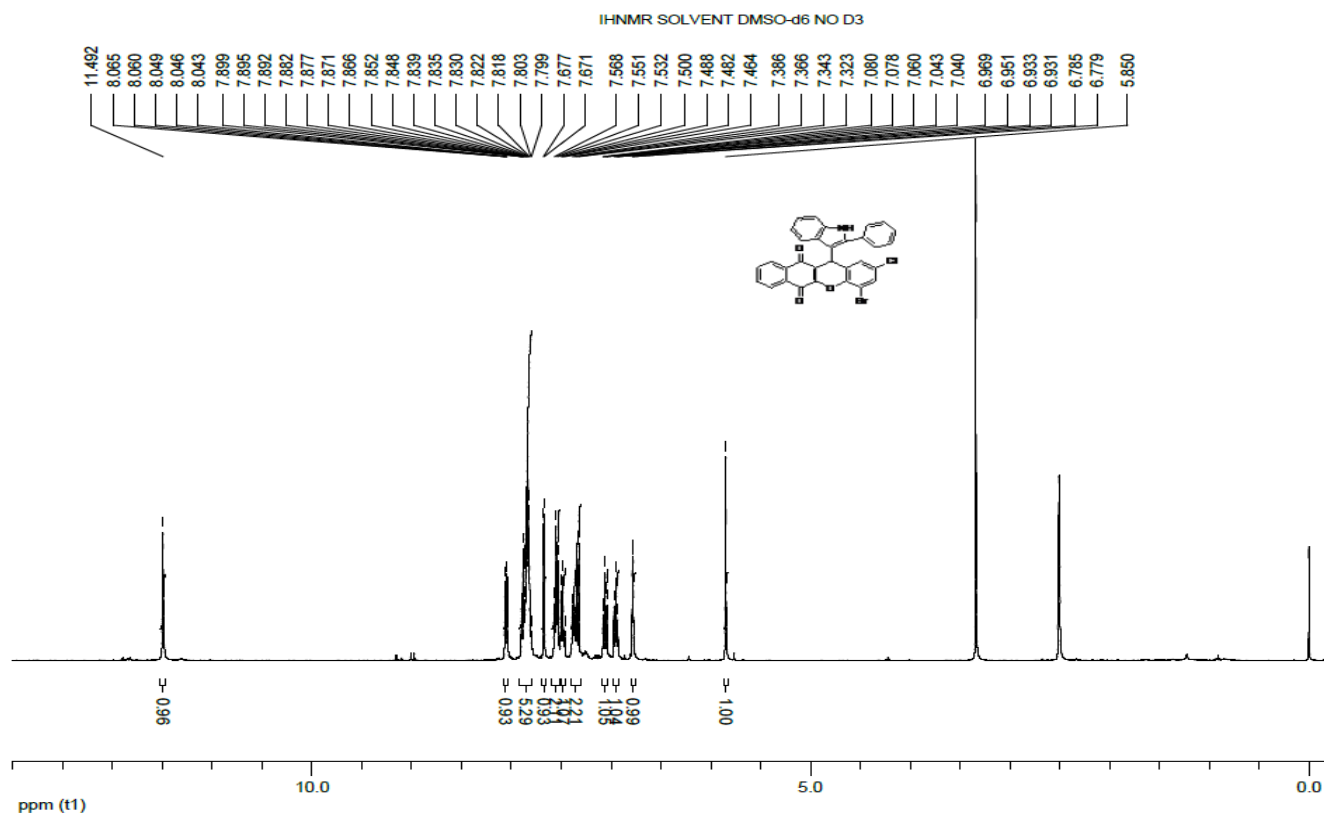

Figure S15 1H NMR of 4d

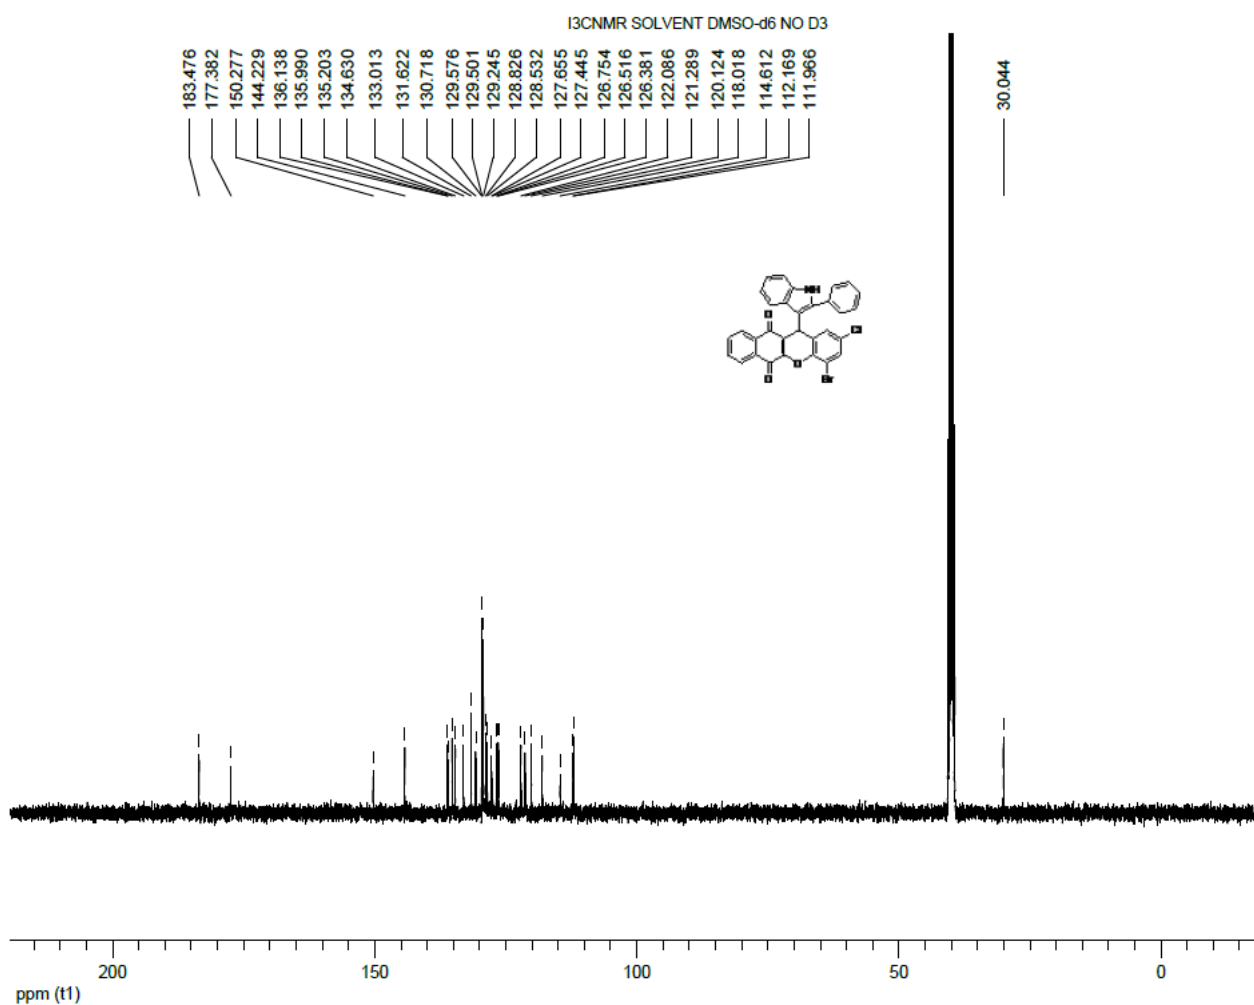

Figure S16 13C NMR of 4d

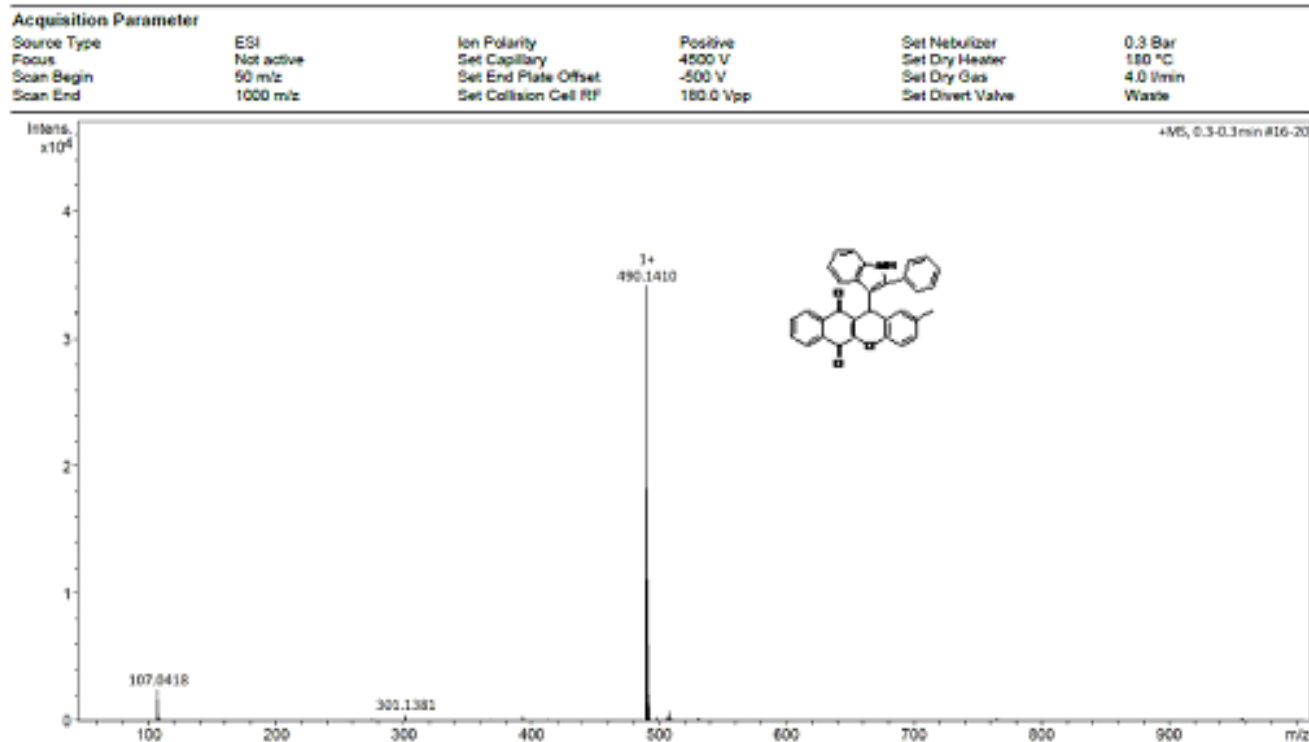

Figure S17 HRMS of 4e

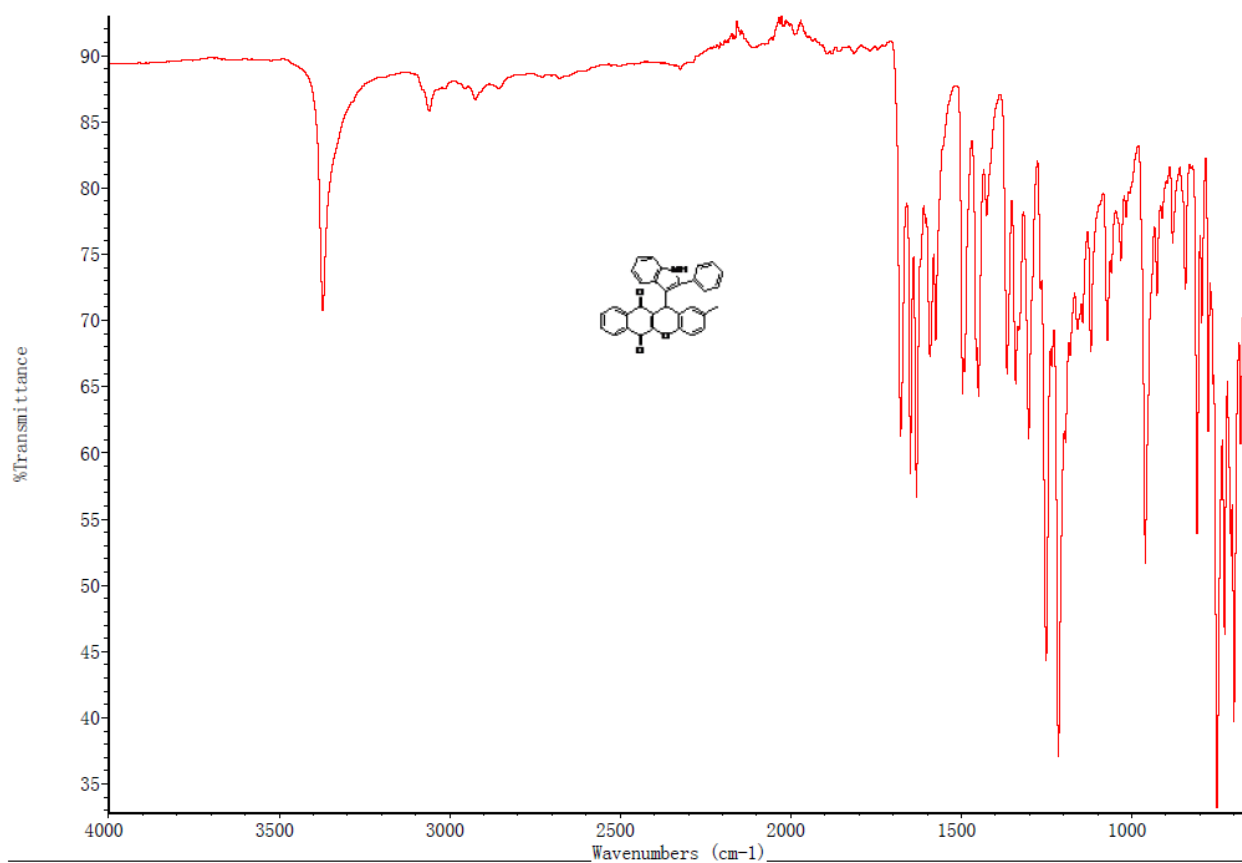

Figure S18 IR of 4e

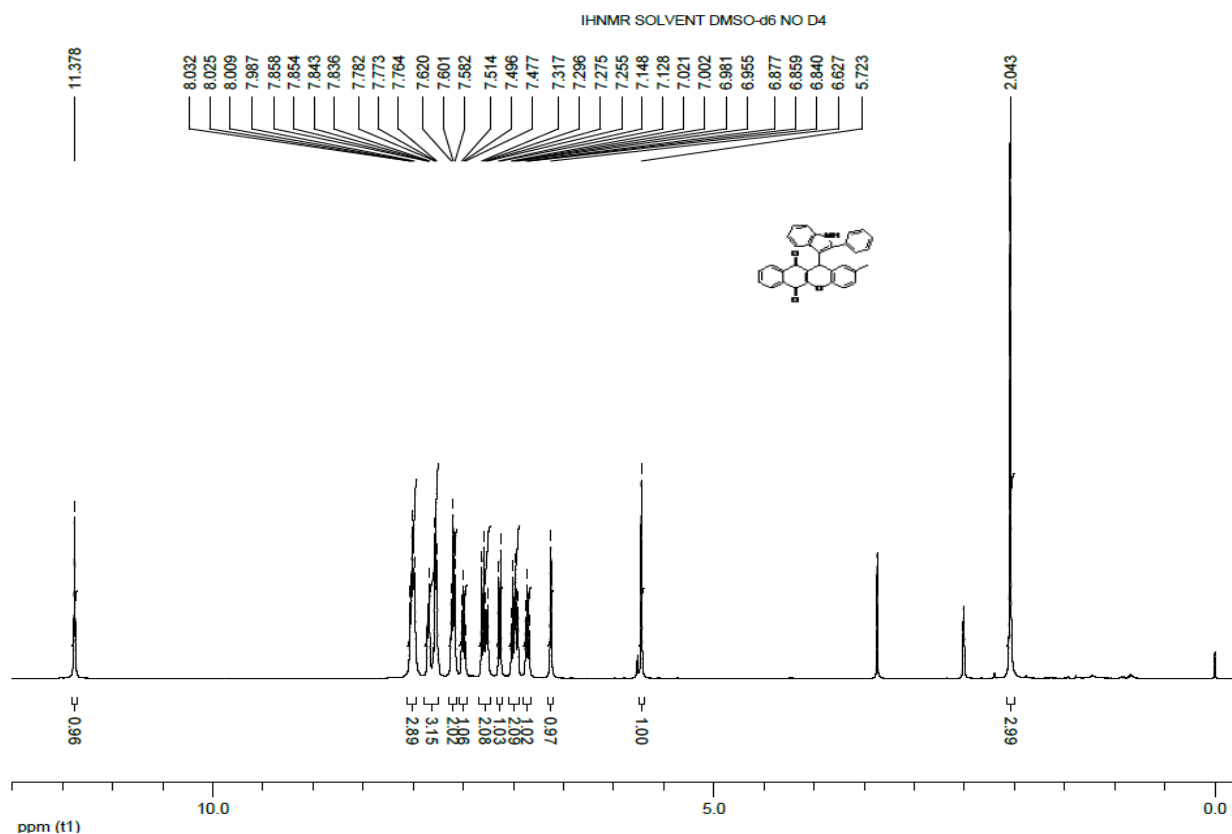

Figure S19 1H NMR of 4e

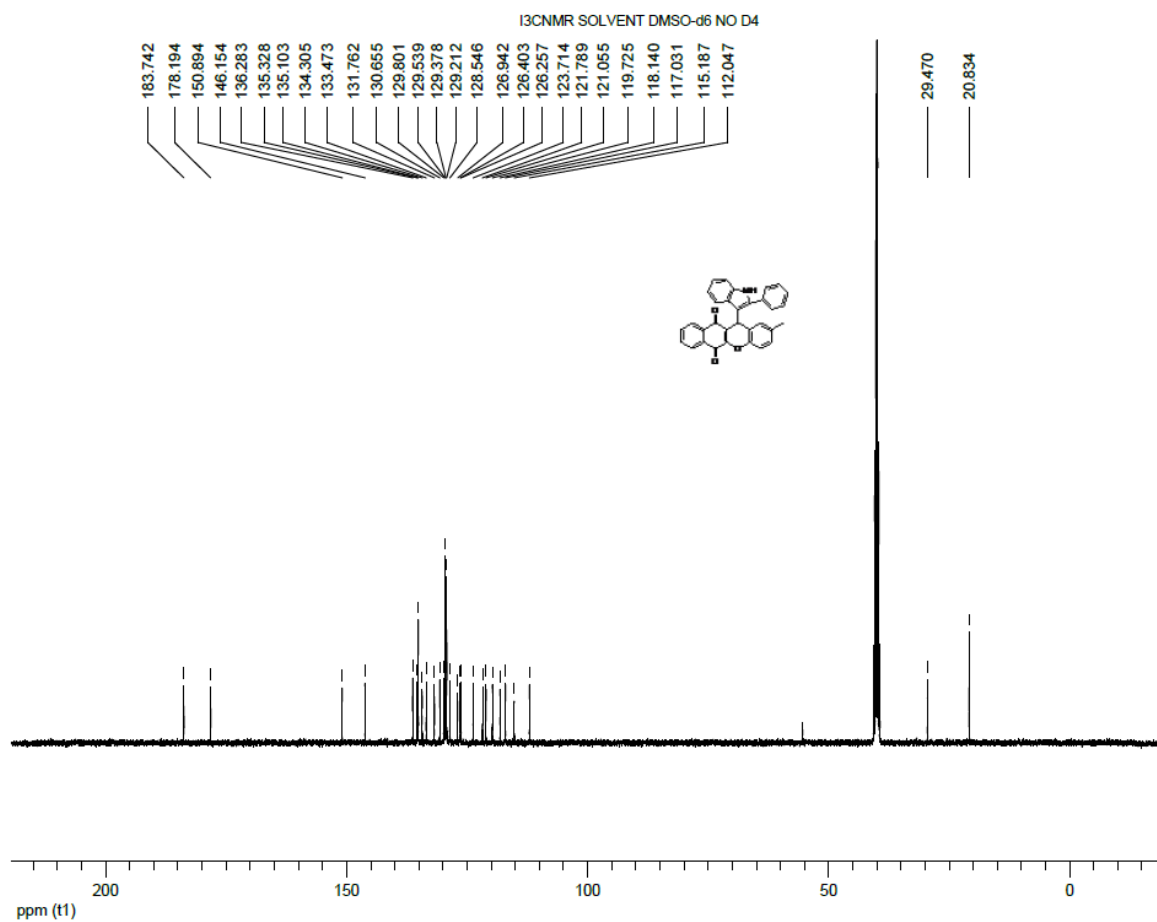

Figure S20 13C NMR of 4e

**Acquisition Parameter**

|             |            |                       |           |                  |           |
|-------------|------------|-----------------------|-----------|------------------|-----------|
| Source Type | ESI        | Ion Polarity          | Positive  | Set Nebulizer    | 0.3 Bar   |
| Focus       | Not active | Set Capillary         | 4500 V    | Set Dry Heater   | 180 °C    |
| Scan Begin  | 50 m/z     | Set End Plate Offset  | -500 V    | Set Dry Gas      | 4.0 l/min |
| Scan End    | 1000 m/z   | Set Collision Cell RF | 350.0 Vpp | Set Divert Valve | Waste     |

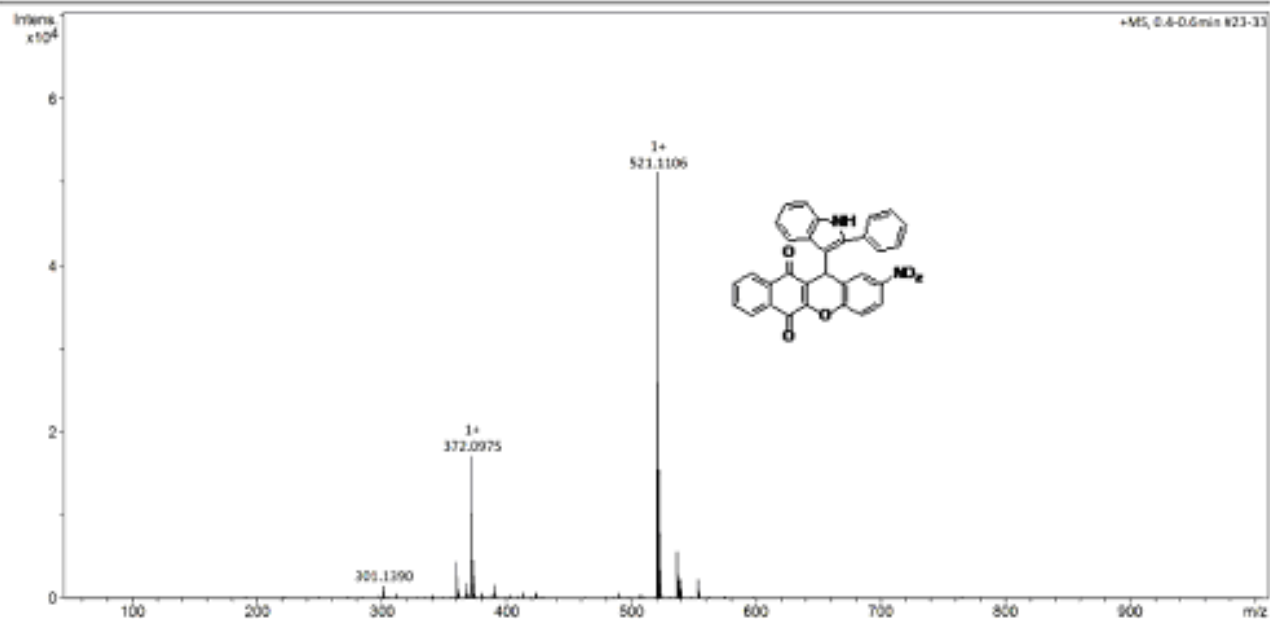**Figure S21 HRMS of 4f**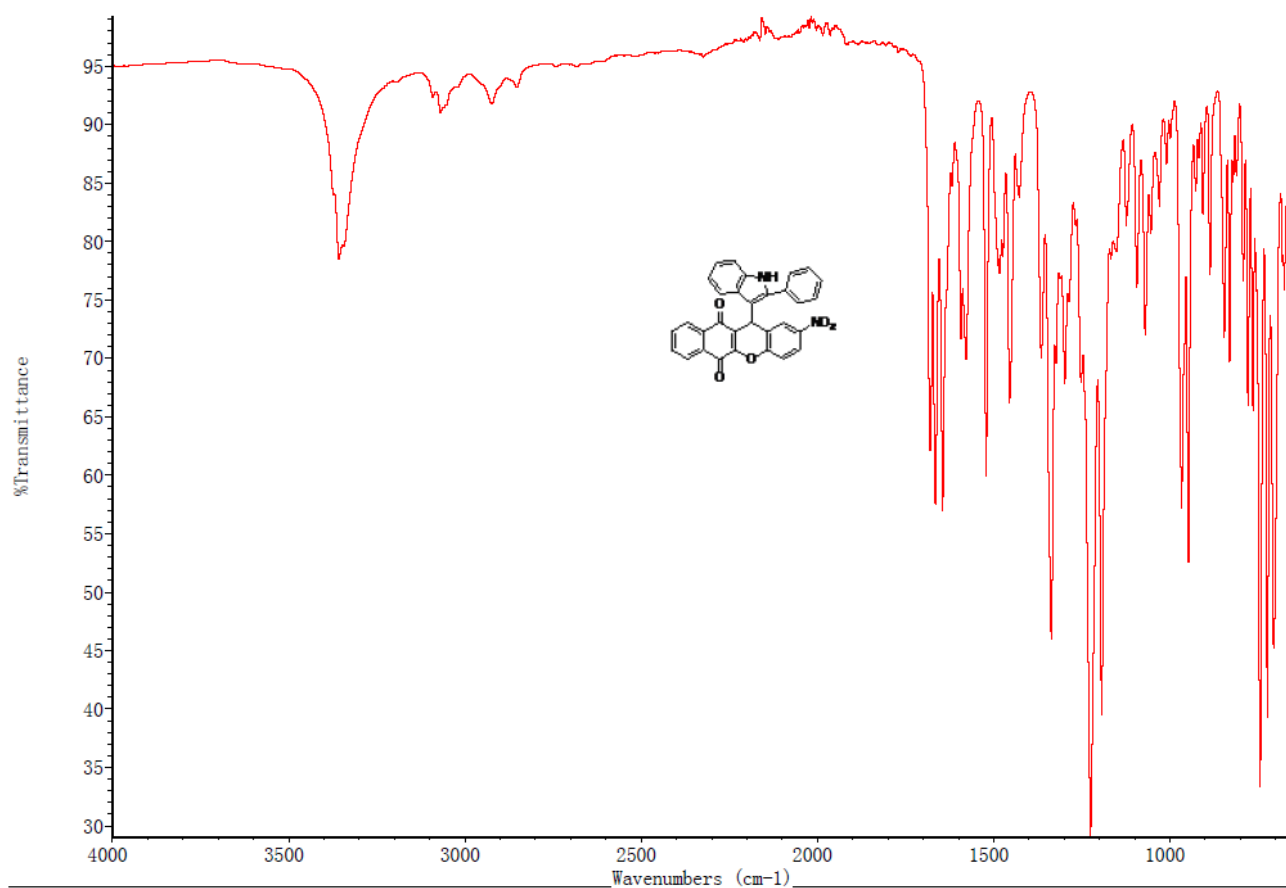**Figure S22 IR of 4f**



| Acquisition Parameter |            |                       |           |                  |           |  |
|-----------------------|------------|-----------------------|-----------|------------------|-----------|--|
| Source Type           | ESI        | Ion Polarity          | Positive  | Set Nebulizer    | 0.3 Bar   |  |
| Focus                 | Not active | Set Capillary         | 4500 V    | Set Dry Heater   | 180 °C    |  |
| Scan Begin            | 50 m/z     | Set End Plate Offset  | -500 V    | Set Dry Gas      | 4.0 l/min |  |
| Scan End              | 1000 m/z   | Set Collision Cell RF | 280.0 Vpp | Set Divert Valve | Waste     |  |

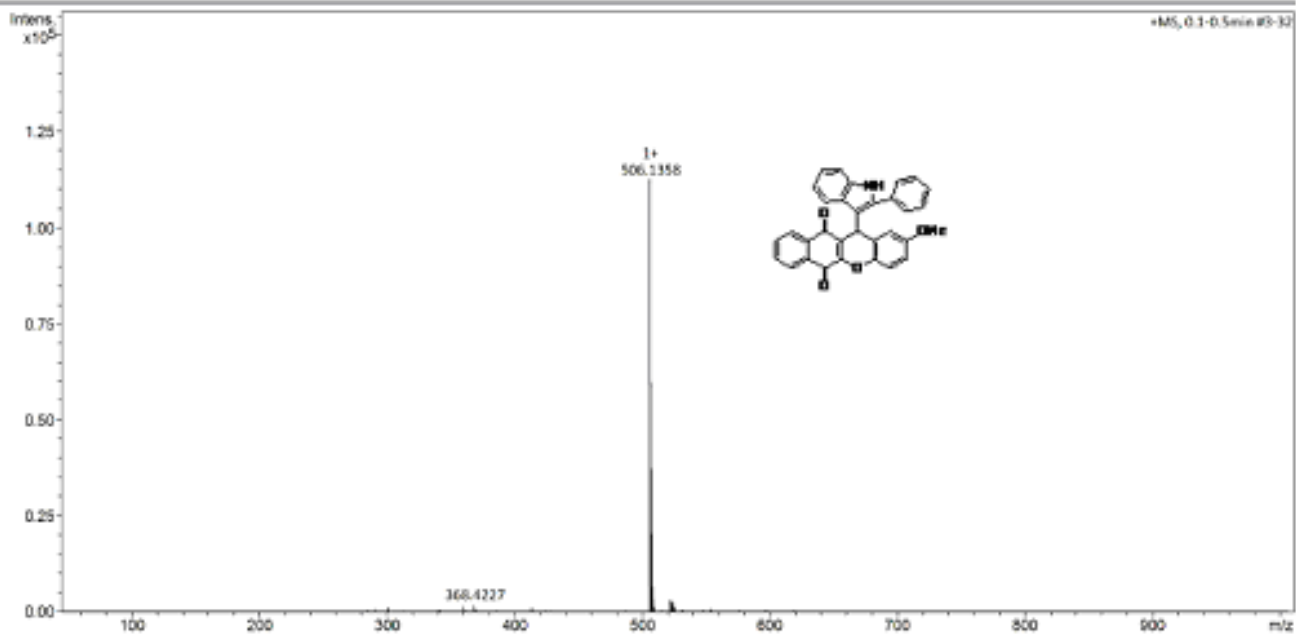

Figure S25 HRMS of 4g

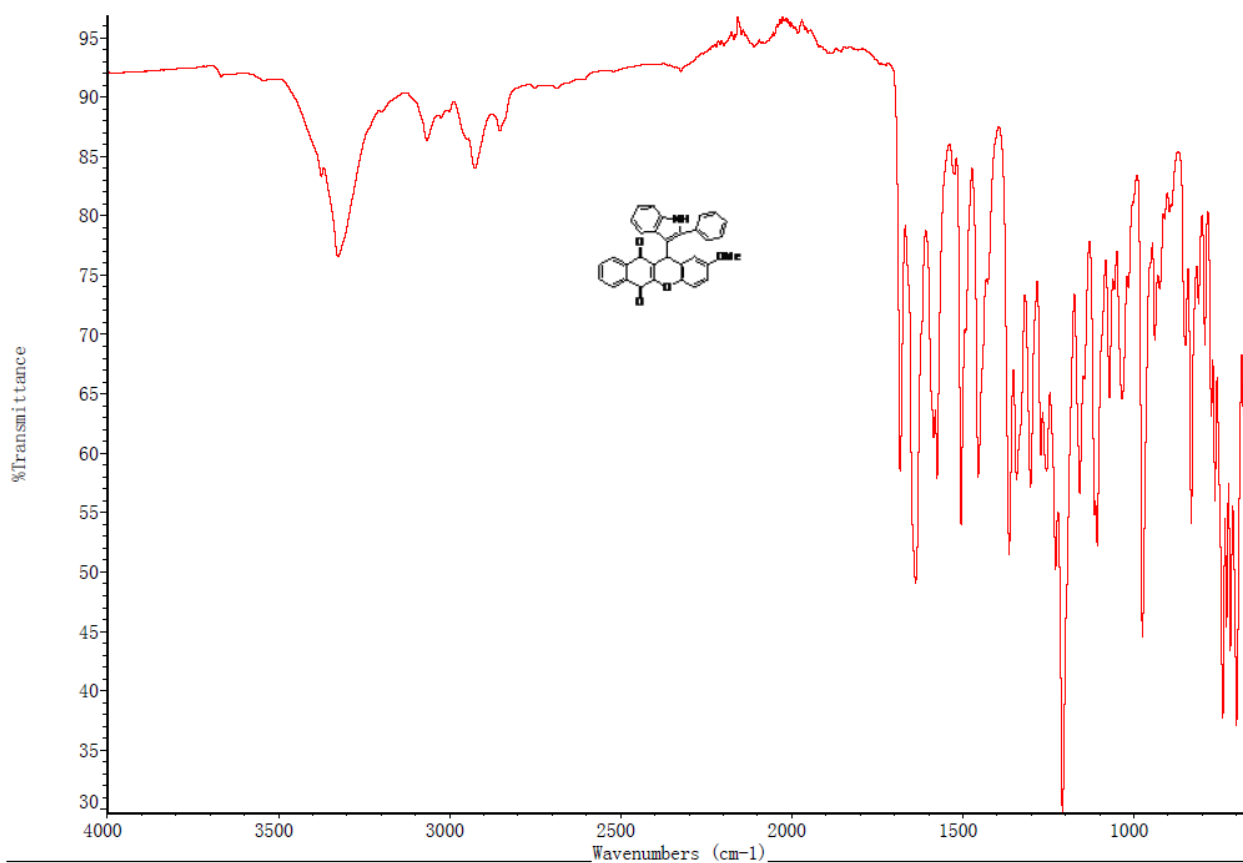

Figure S26 IR of 4g

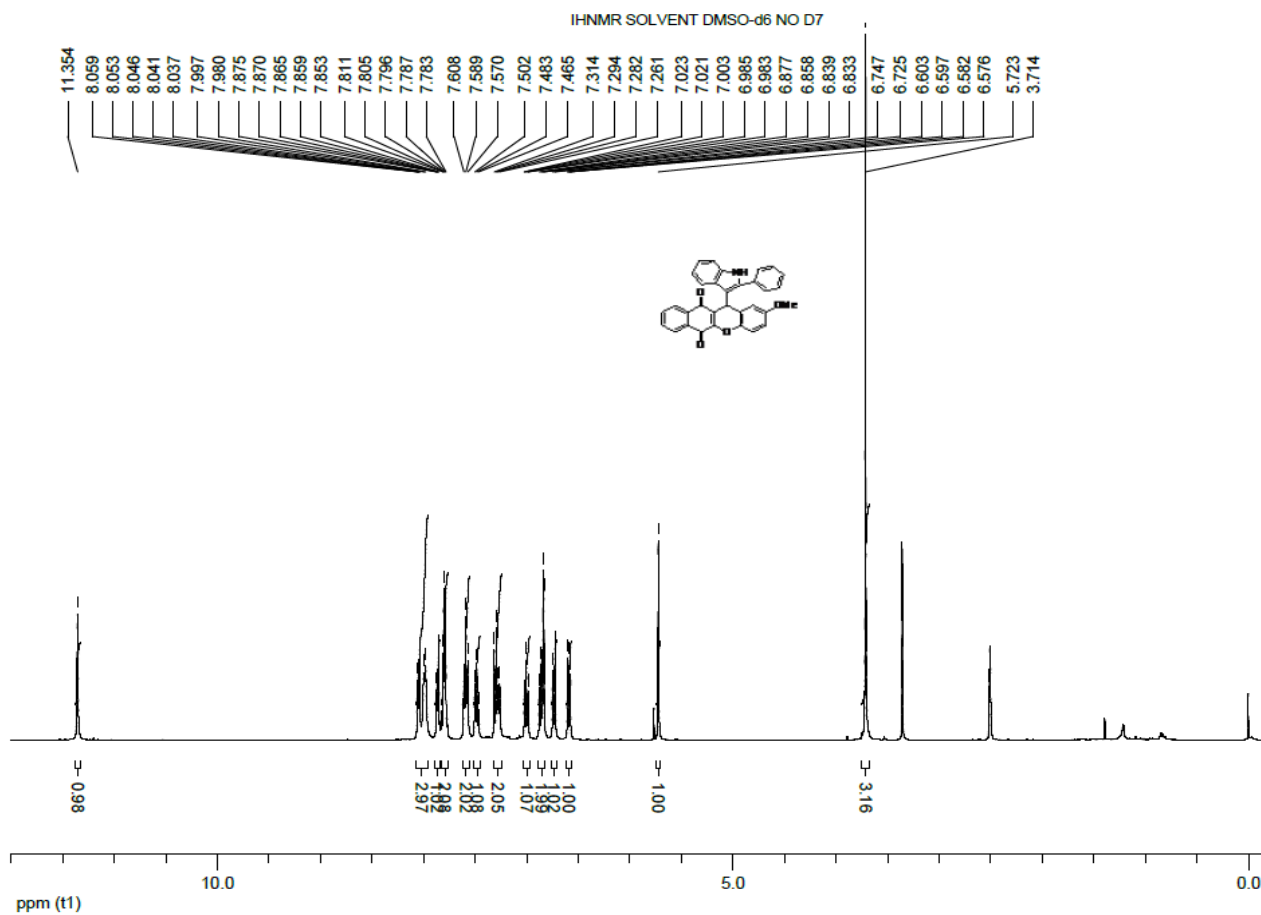

Figure S27 <sup>1</sup>H NMR of 4g

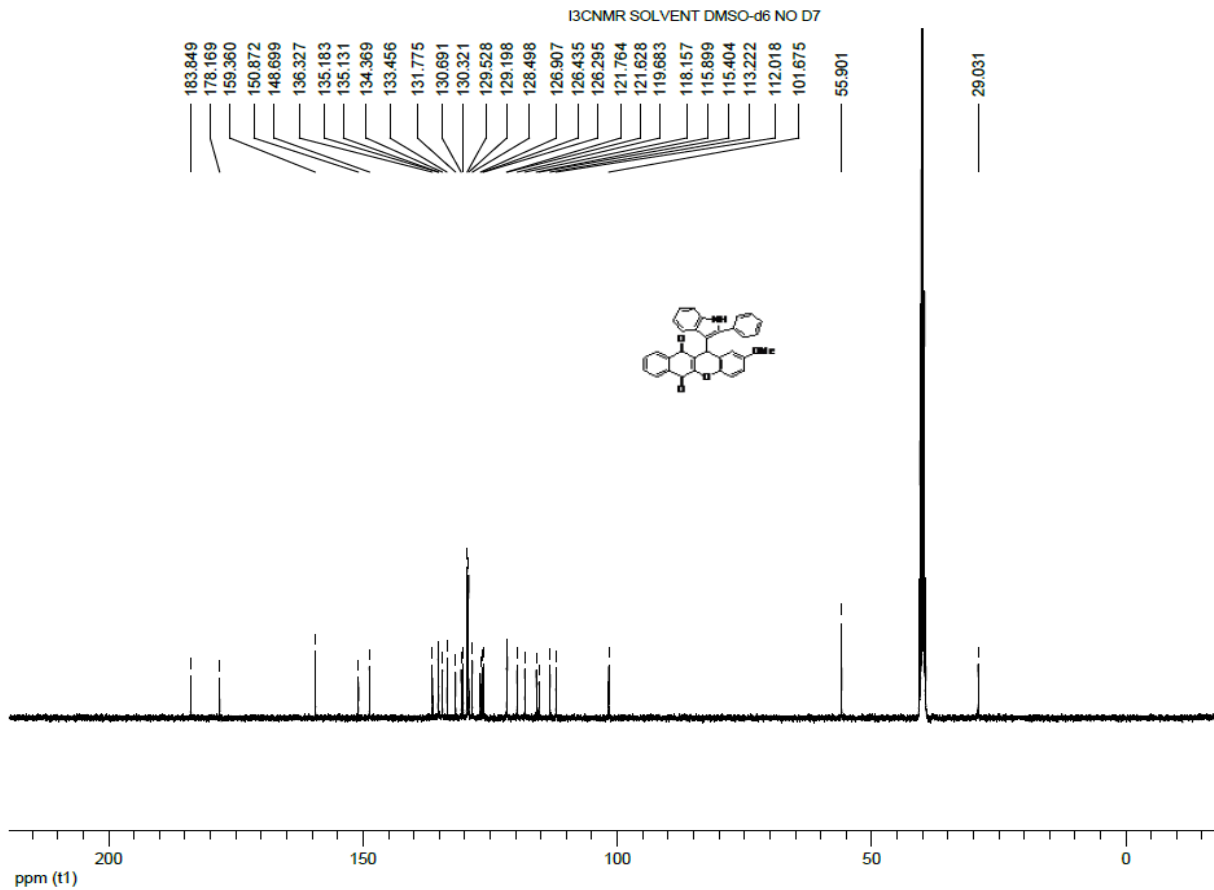

Figure S28 <sup>13</sup>C NMR of 4g

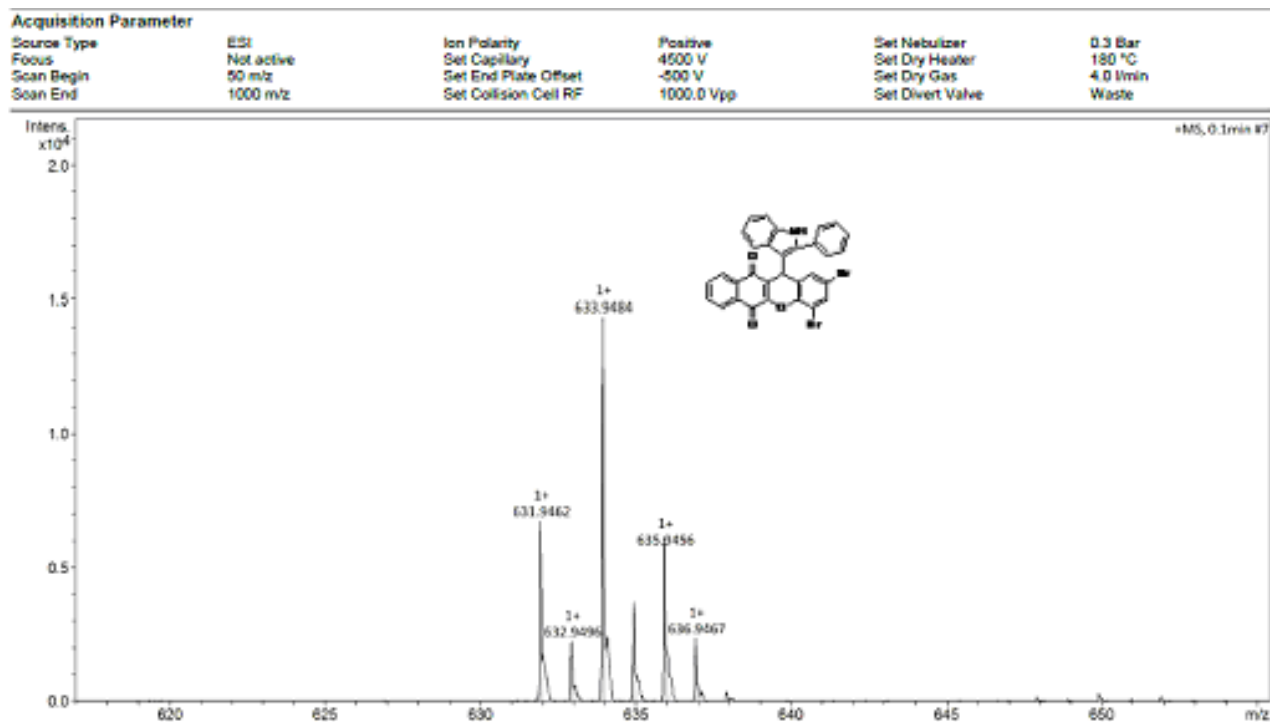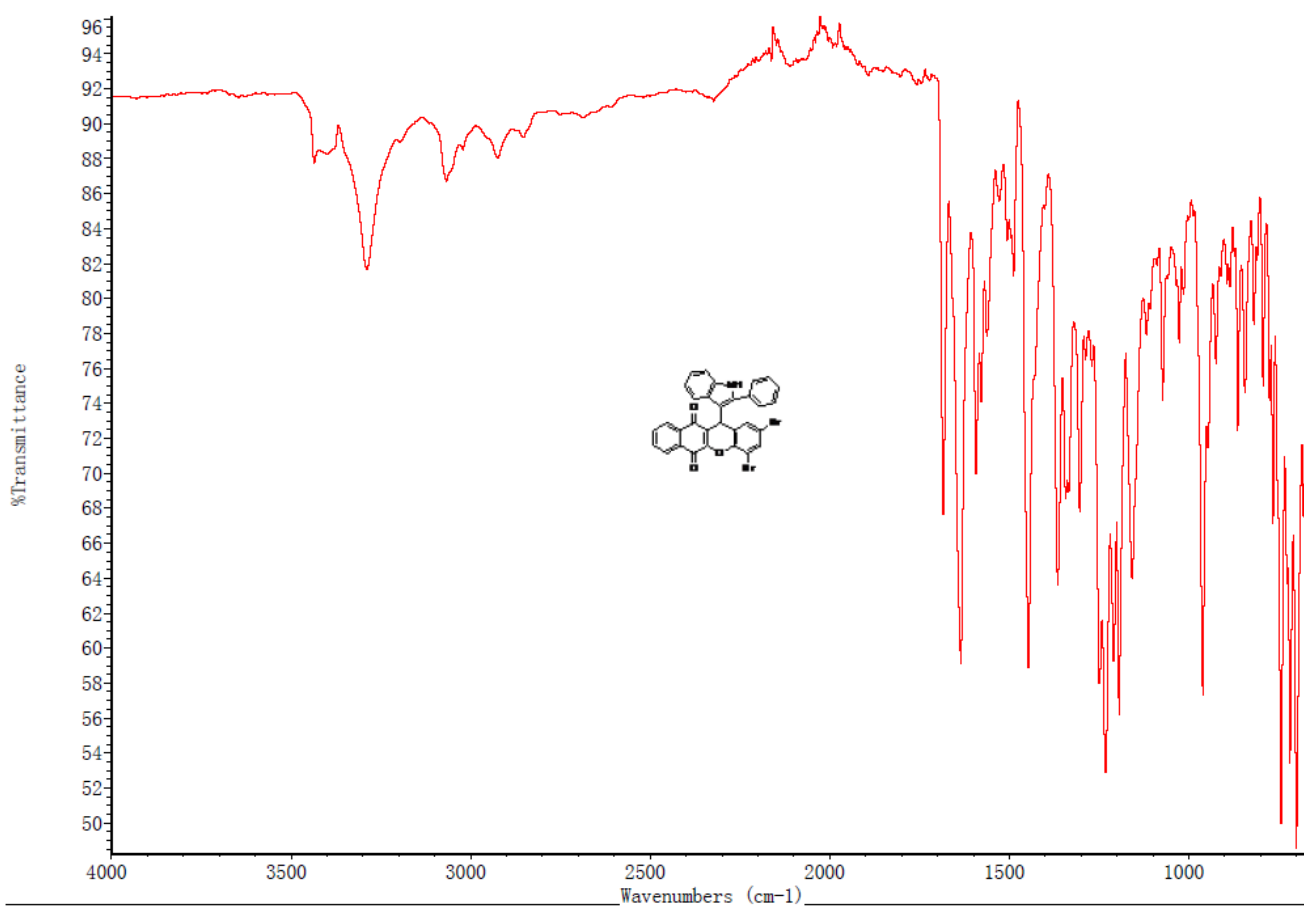



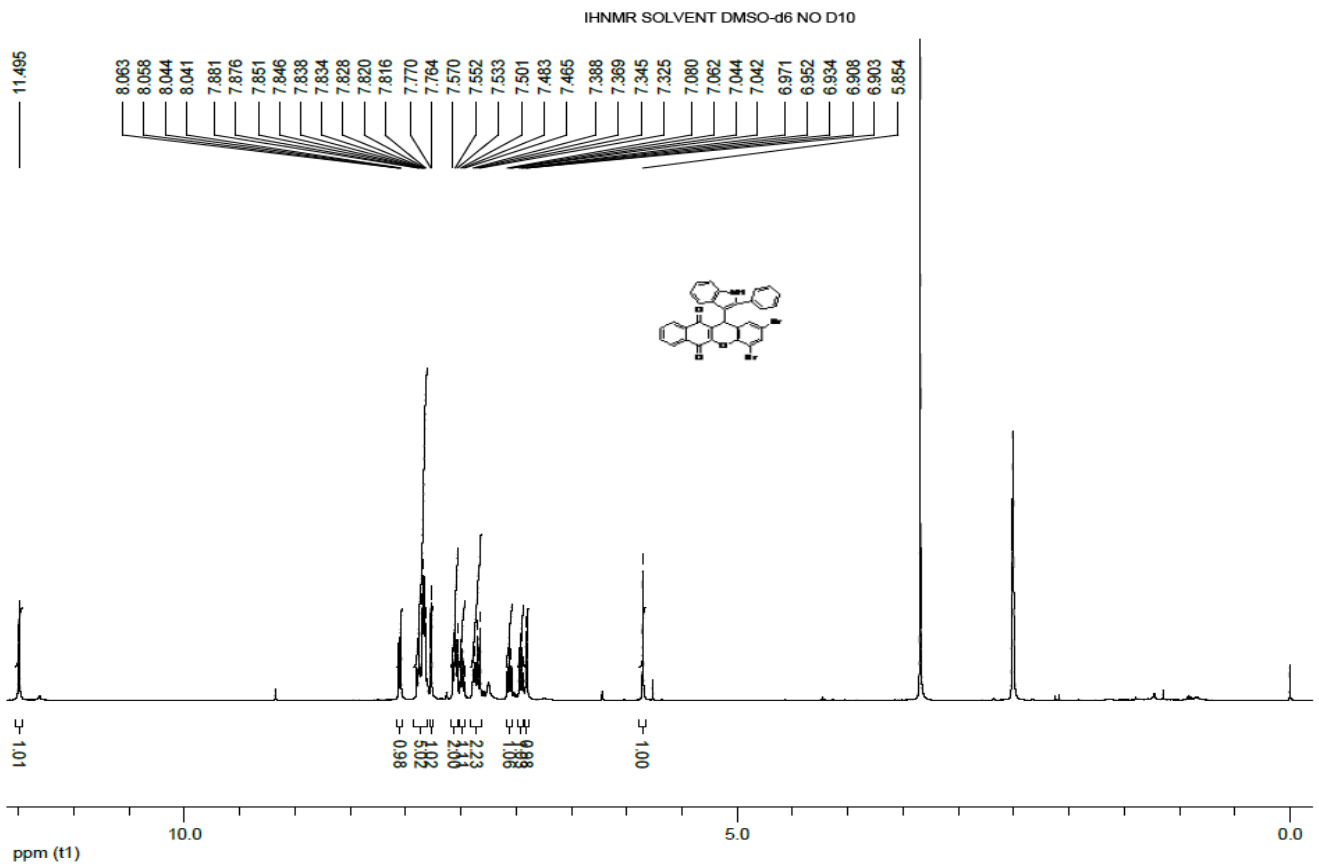

Figure S31 1H NMR of 4h

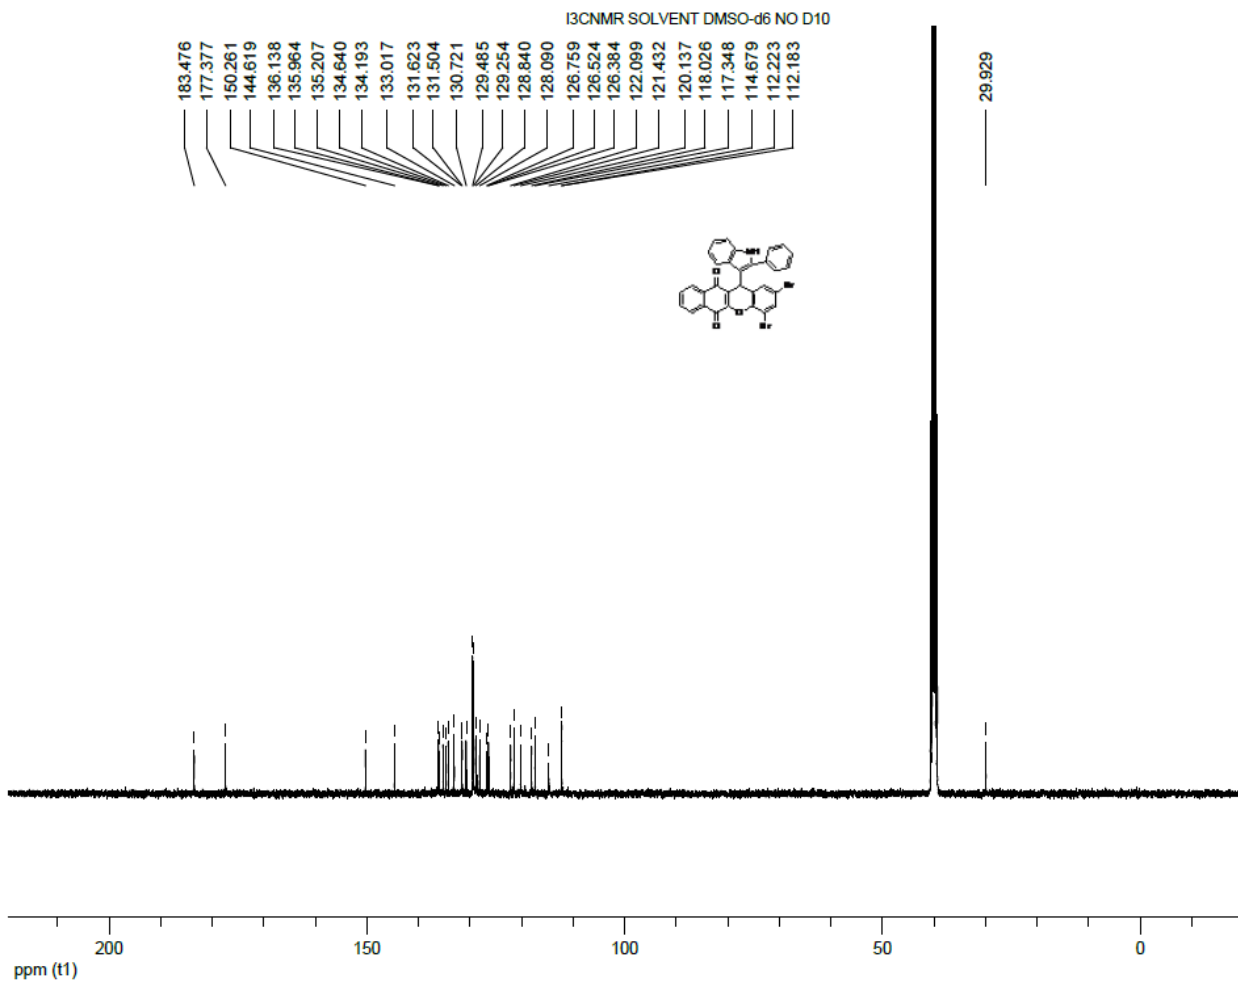

Figure S32 13C NMR of 4h

| Acquisition Parameter |            |                       |           |                  |           |
|-----------------------|------------|-----------------------|-----------|------------------|-----------|
| Source Type           | ESI        | Ion Polarity          | Positive  | Set Nebulizer    | 0.3 Bar   |
| Focus                 | Not active | Set Capillary         | 4500 V    | Set Dry Heater   | 180 °C    |
| Scan Begin            | 50 m/z     | Set End Plate Offset  | -500 V    | Set Dry Gas      | 4.0 l/min |
| Scan End              | 1000 m/z   | Set Collision Cell RF | 600.0 Vpp | Set Divert Valve | Waste     |

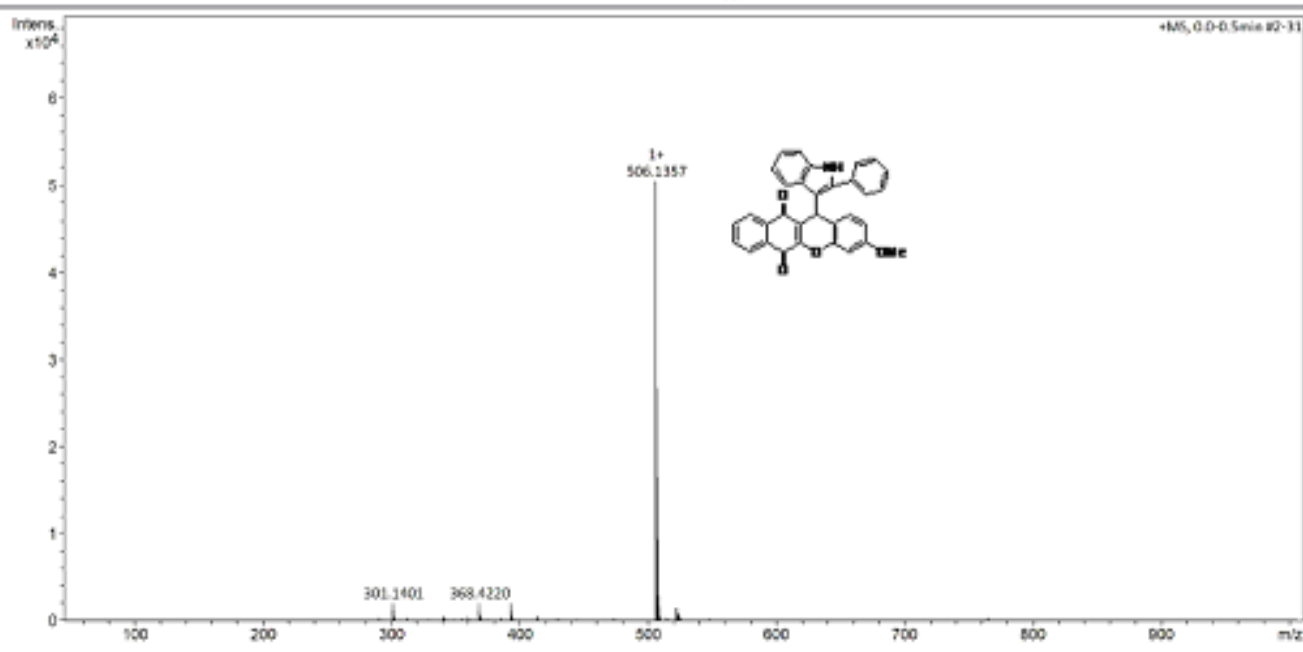

Figure S33 HRMS of 4i

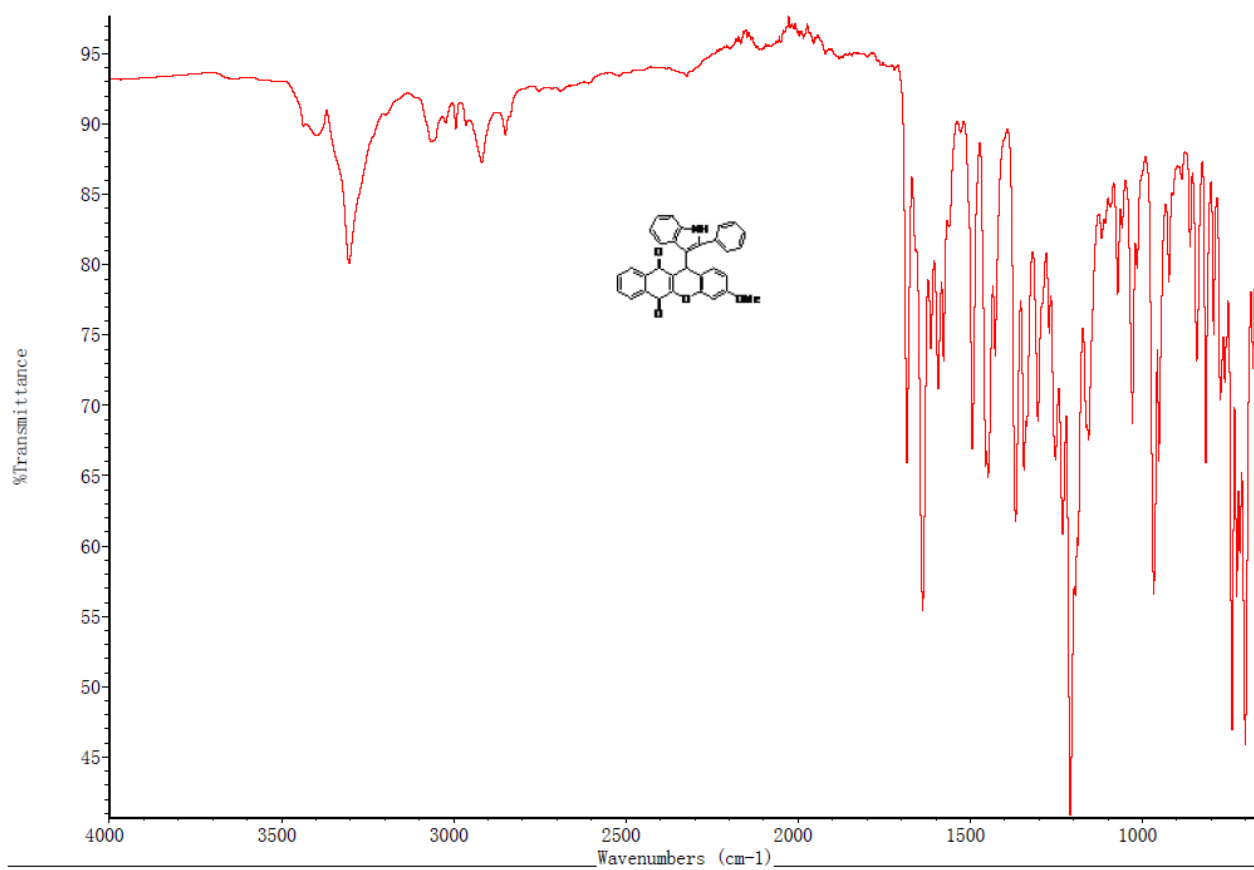

Figure S34 IR of 4i

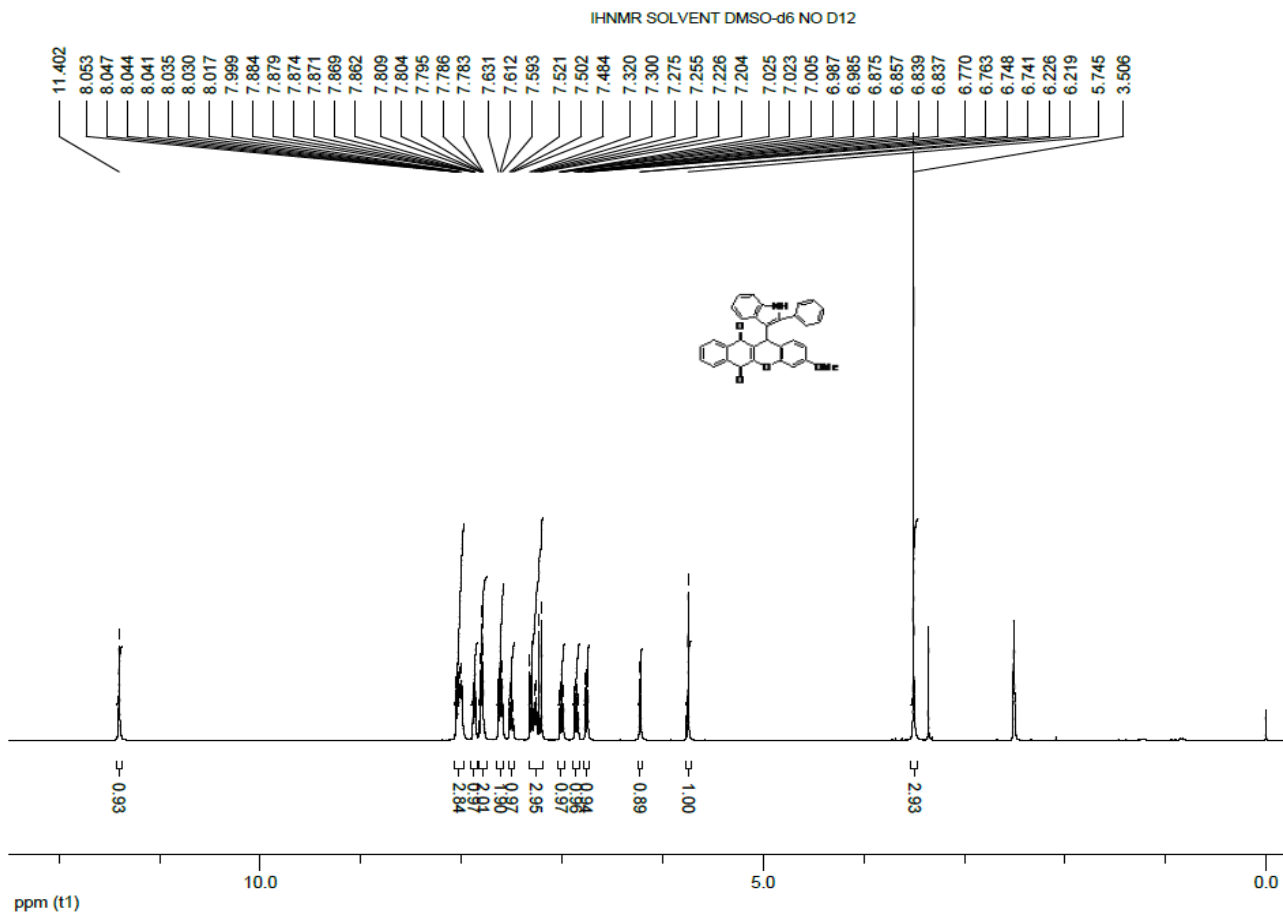

**Figure S35** 1H NMR of **4i**

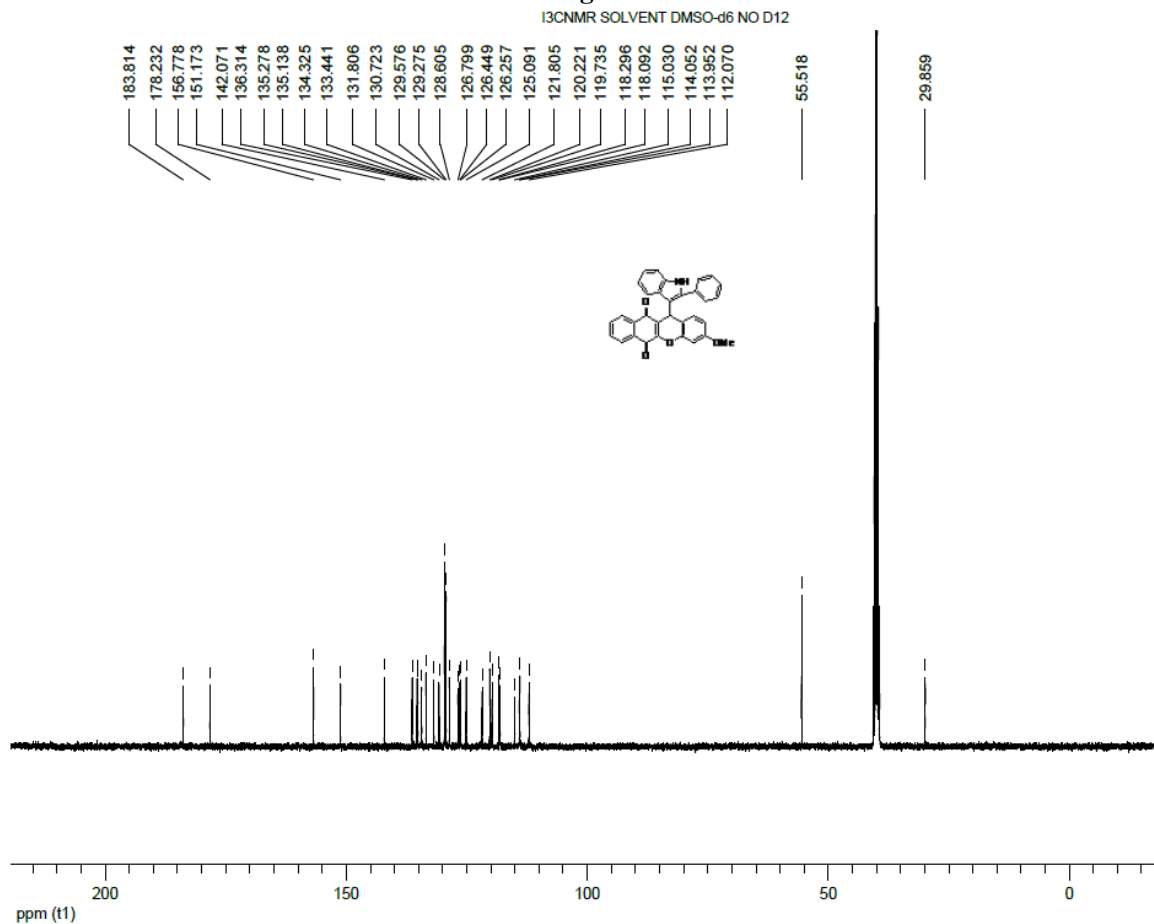

**Figure S36** 13C NMR of **4i**

| Acquisition Parameter |            |                       |           |                  |           |
|-----------------------|------------|-----------------------|-----------|------------------|-----------|
| Source Type           | ESI        | Ion Polarity          | Positive  | Set Nebulizer    | 0.3 Bar   |
| Focus                 | Not active | Set Capillary         | 4500 V    | Set Dry Heater   | 180 °C    |
| Scan Begin            | 50 m/z     | Set End Plate Offset  | -500 V    | Set Dry Gas      | 4.0 l/min |
| Scan End              | 1000 m/z   | Set Collision Cell RF | 180.0 Vpp | Set Divert Valve | Waste     |

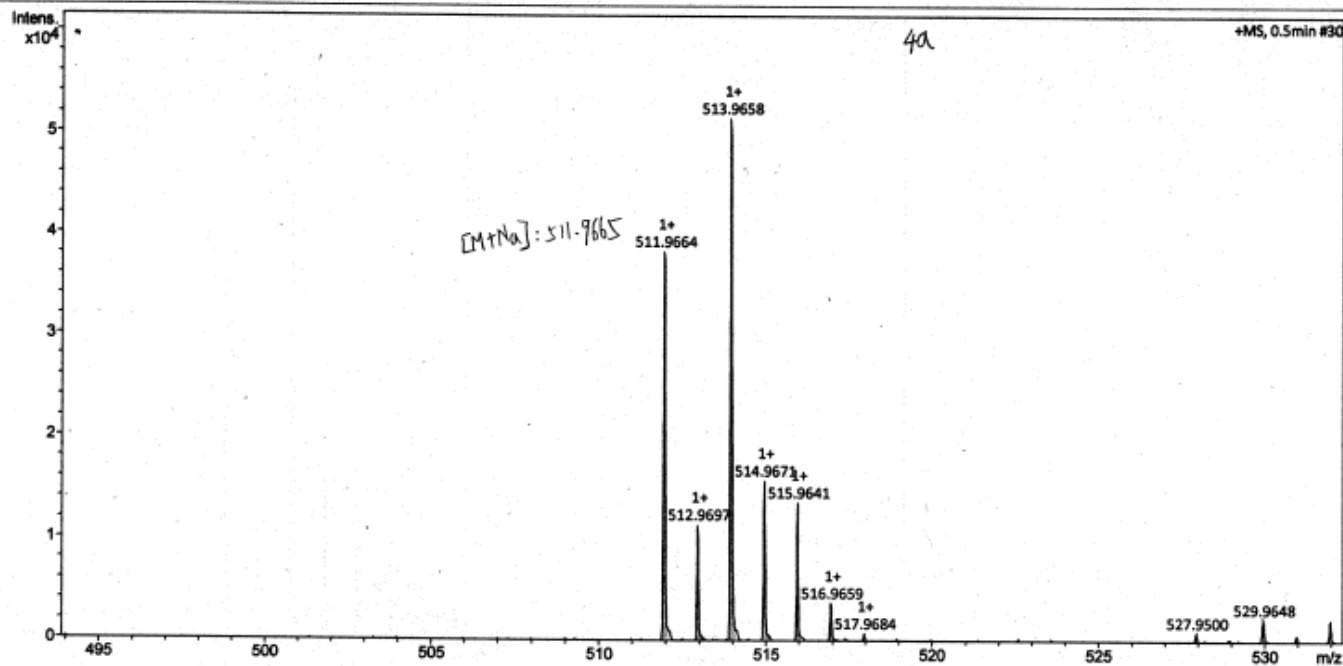

Figure S37 HRMS of 4j

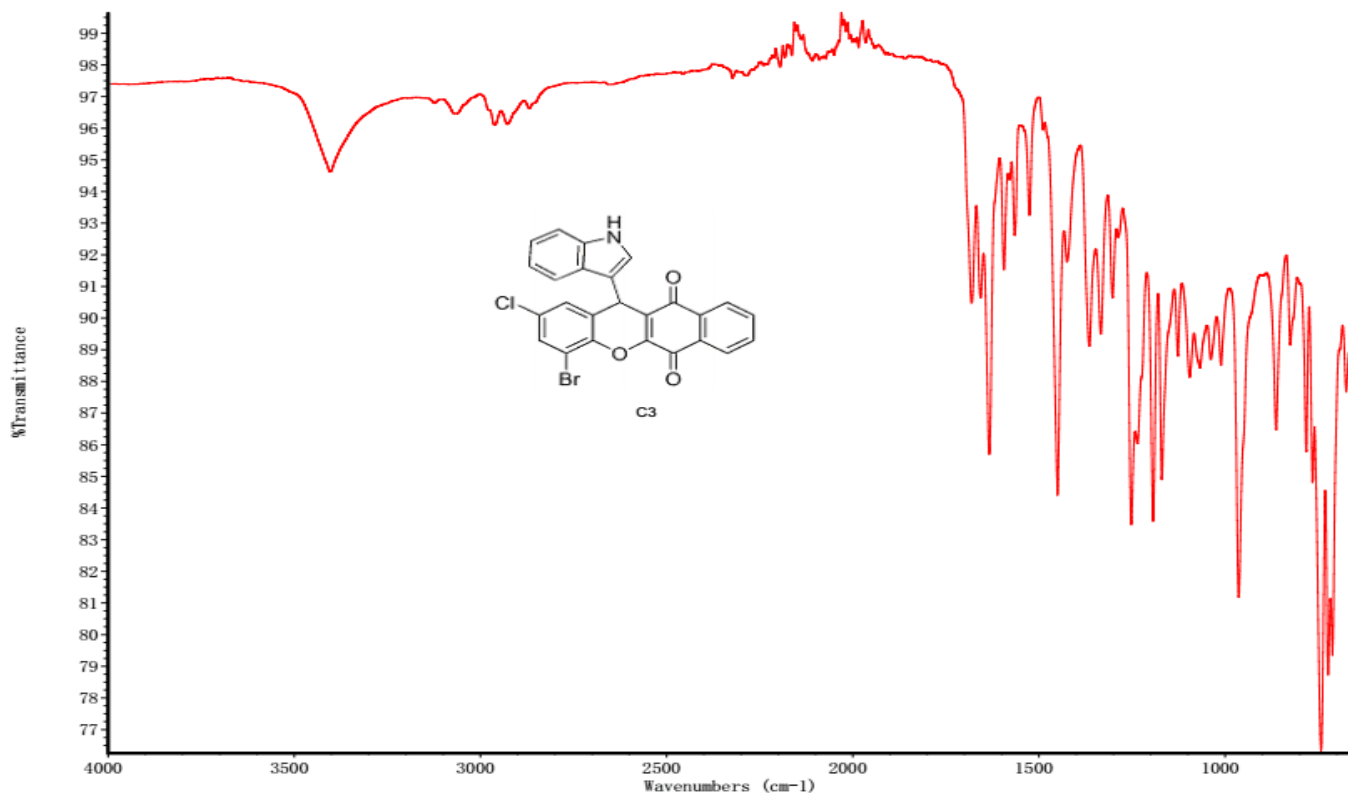

Figure S38 IR of 4j

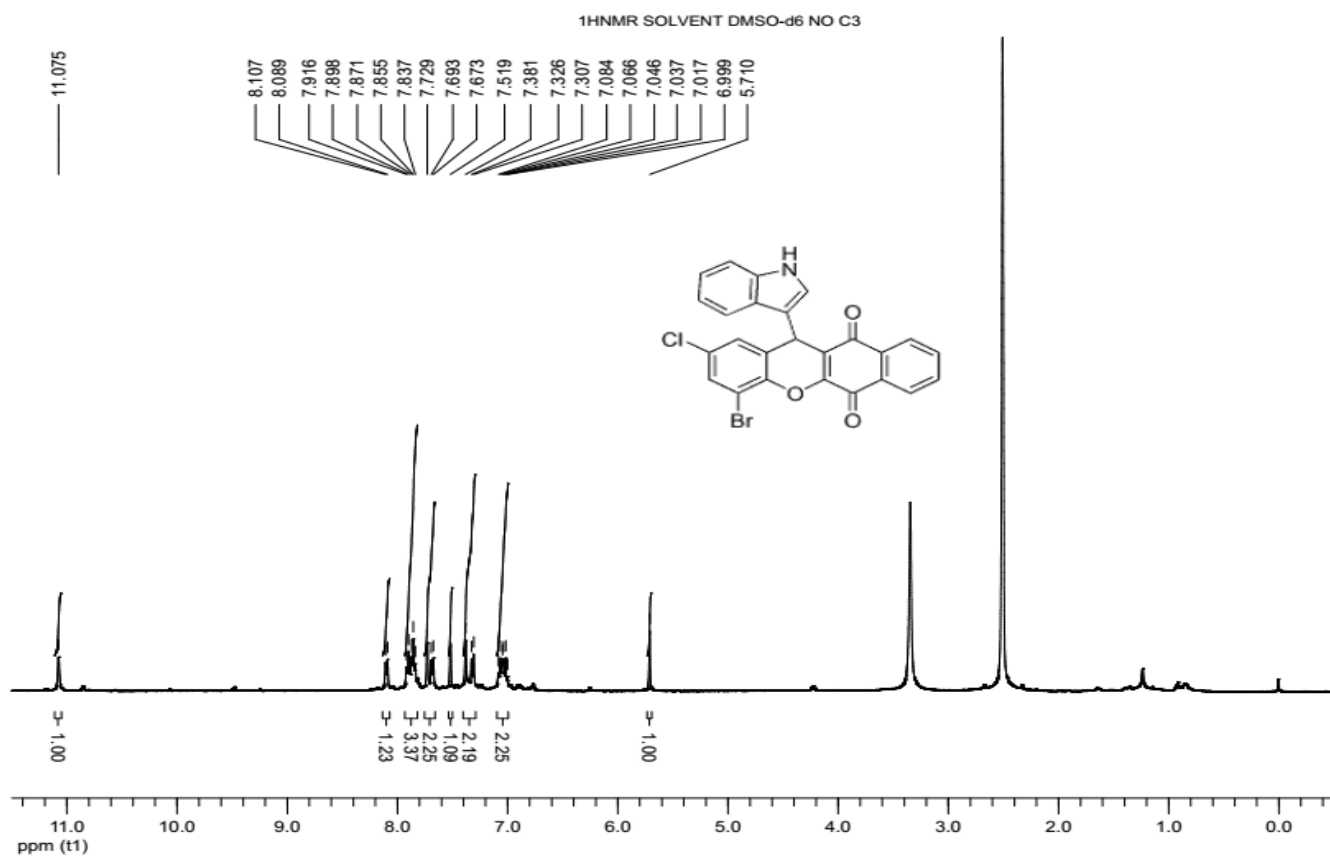

Figure S39 <sup>1</sup>H NMR of 4j

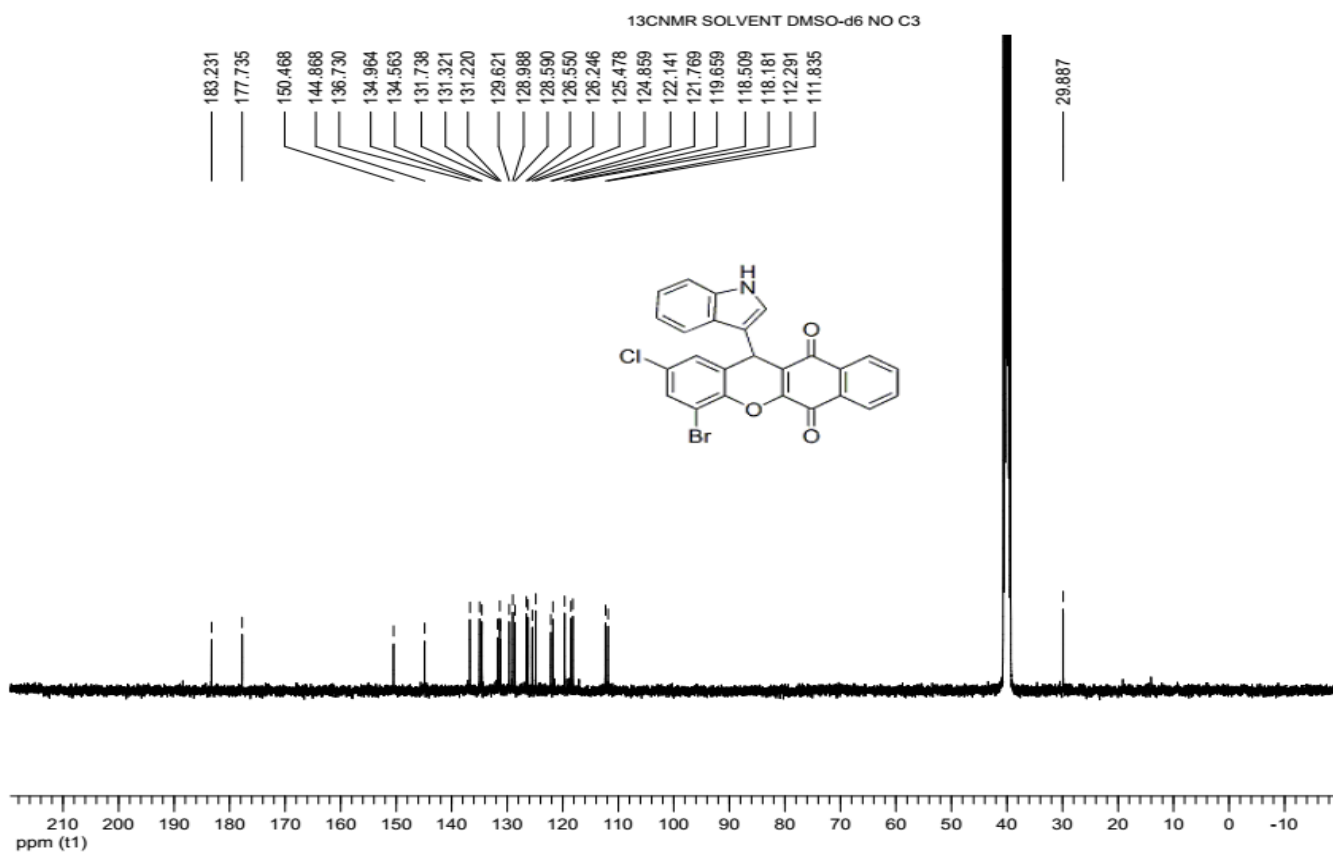

Figure S40 <sup>13</sup>C NMR 4j

Acquisition Parameter

|             |            |                       |           |                  |           |
|-------------|------------|-----------------------|-----------|------------------|-----------|
| Source Type | ESI        | Ion Polarity          | Positive  | Set Nebulizer    | 0.3 Bar   |
| Focus       | Not active | Set Capillary         | 4500 V    | Set Dry Heater   | 180 °C    |
| Scan Begin  | 50 m/z     | Set End Plate Offset  | -500 V    | Set Dry Gas      | 4.0 l/min |
| Scan End    | 1000 m/z   | Set Collision Cell RF | 180.0 Vpp | Set Divert Valve | Waste     |

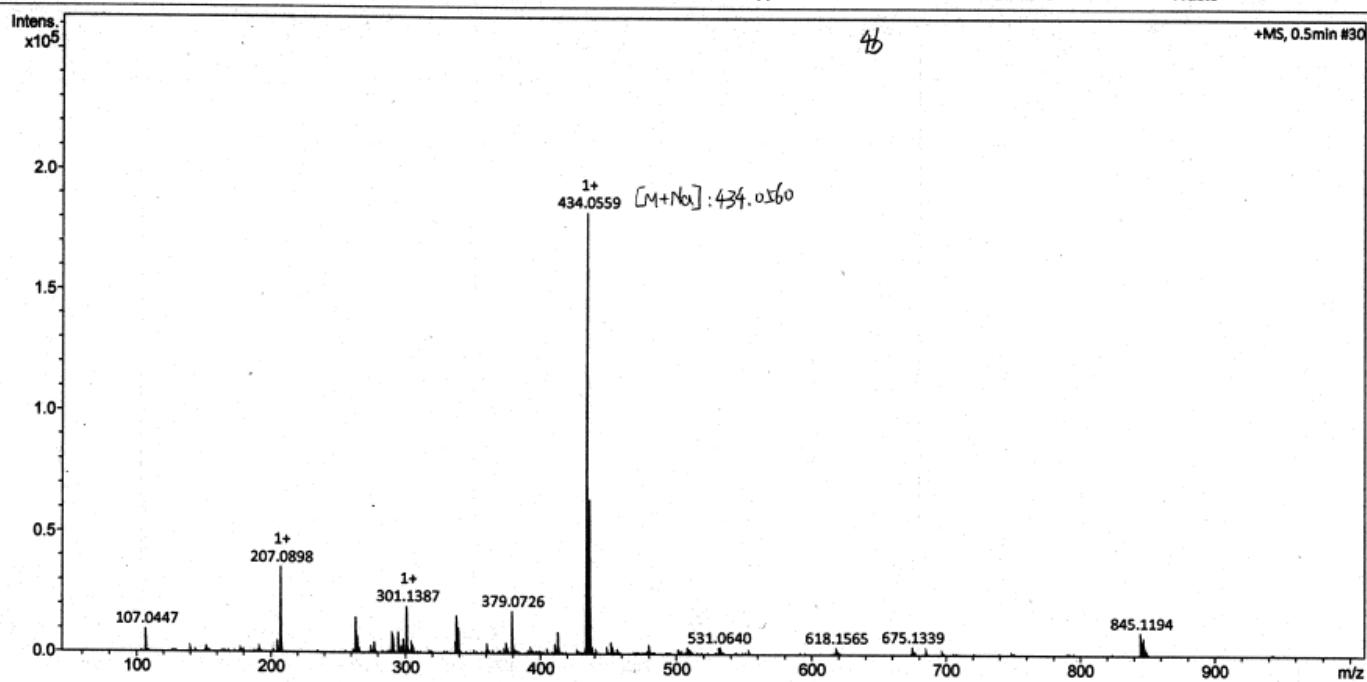

Figure S41 HRMS of 4k

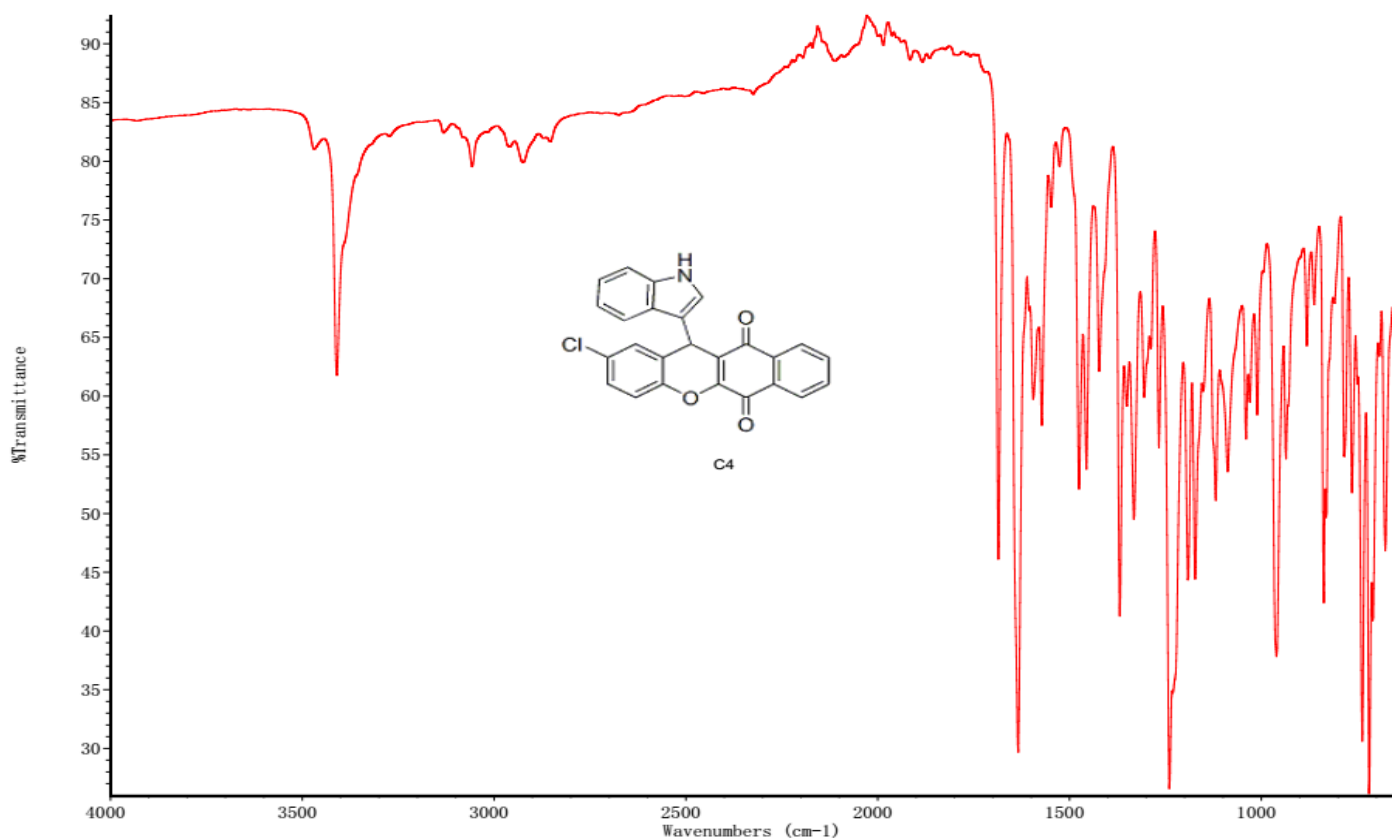

Figure S42 IR of 4k

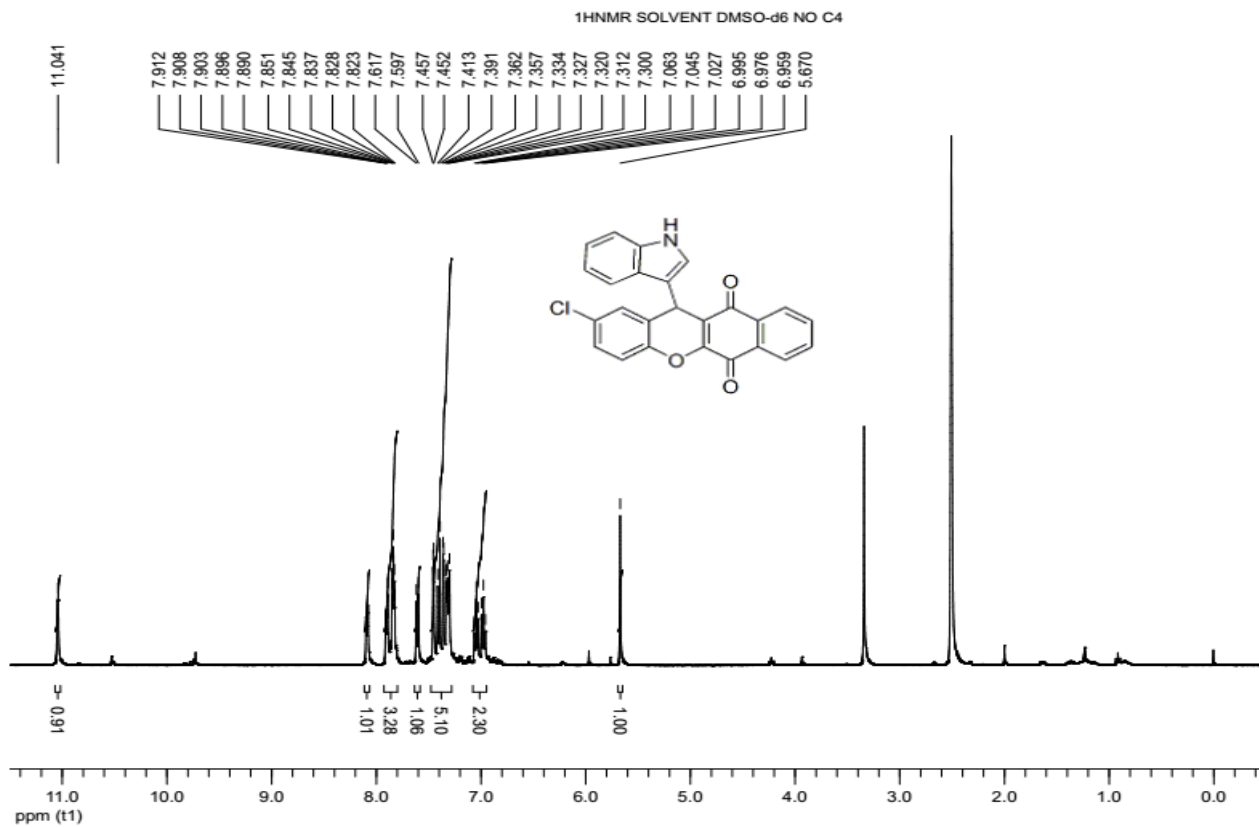

Figure S43  $^1\text{H}$  NMR of 4k

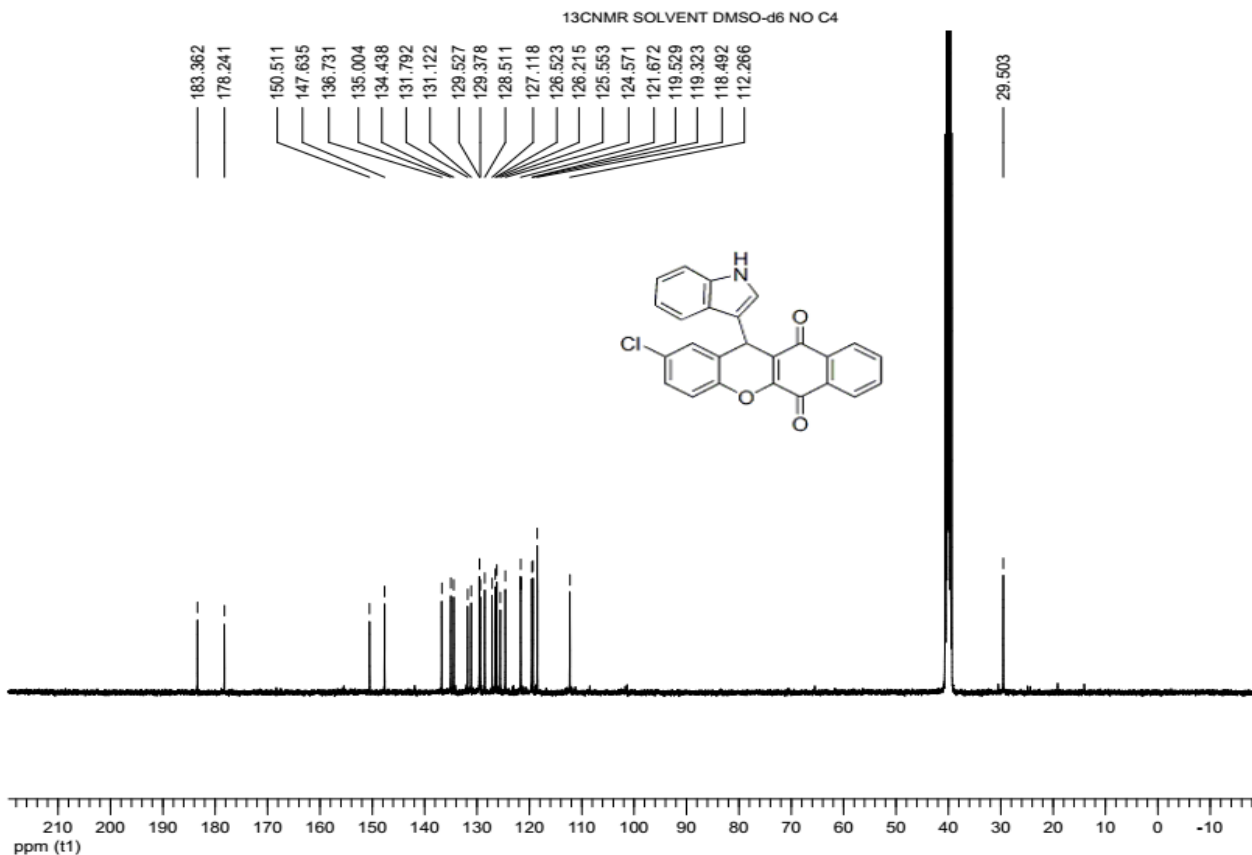

Figure S44  $^{13}\text{C}$  NMR of 4k

| Acquisition Parameter |            |                       |           |                  |           |
|-----------------------|------------|-----------------------|-----------|------------------|-----------|
| Source Type           | ESI        | Ion Polarity          | Positive  | Set Nebulizer    | 0.3 Bar   |
| Focus                 | Not active | Set Capillary         | 4500 V    | Set Dry Heater   | 180 °C    |
| Scan Begin            | 50 m/z     | Set End Plate Offset  | -500 V    | Set Dry Gas      | 4.0 l/min |
| Scan End              | 1000 m/z   | Set Collision Cell RF | 180.0 Vpp | Set Divert Valve | Waste     |

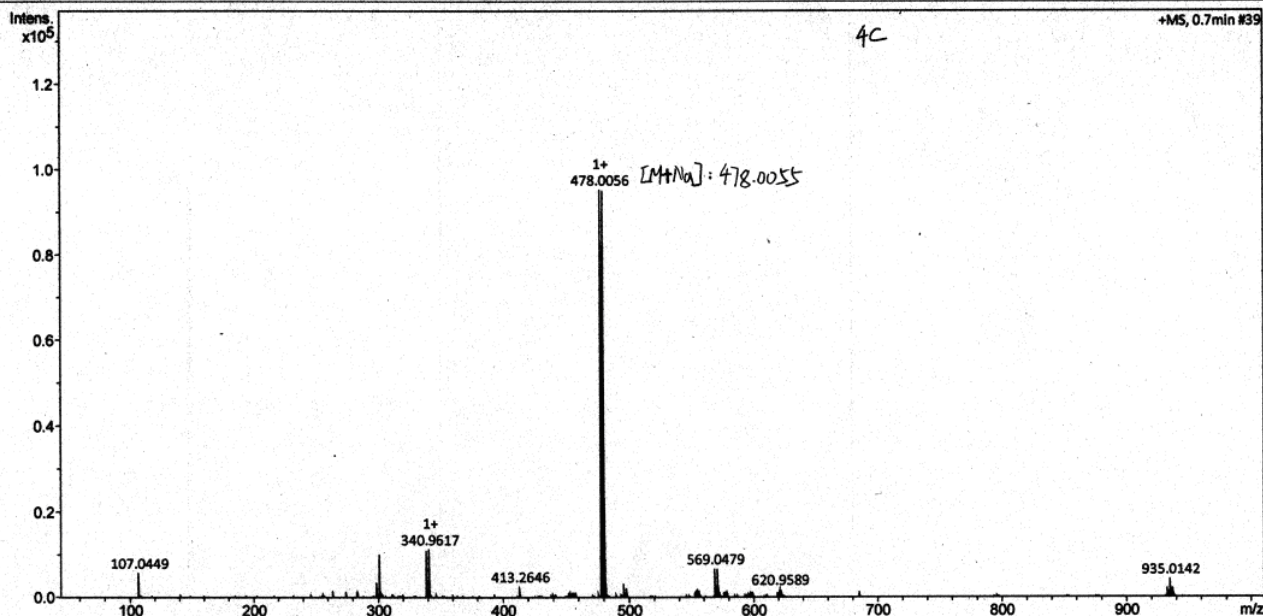

Figure S45 HRMS of 4I

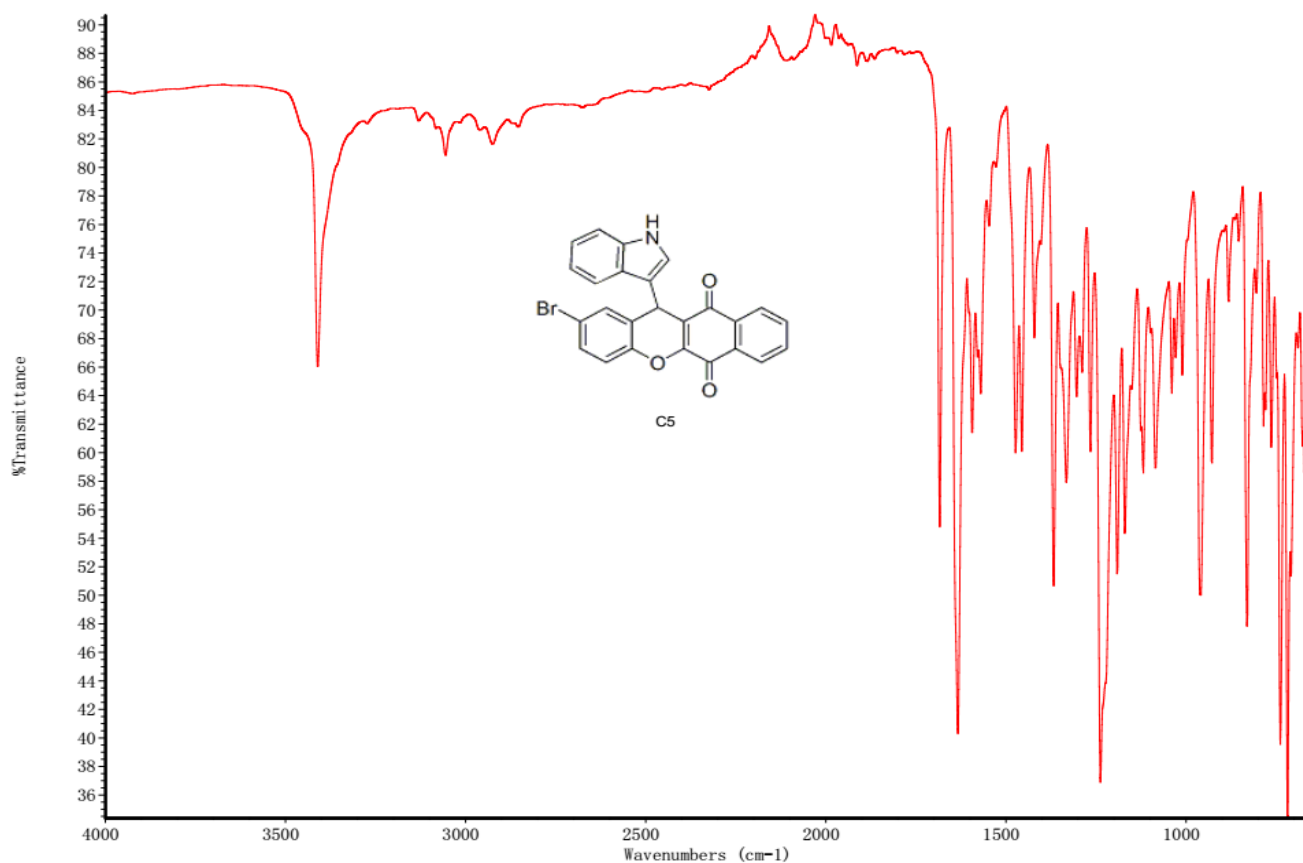

Figure S46 IR of 4I



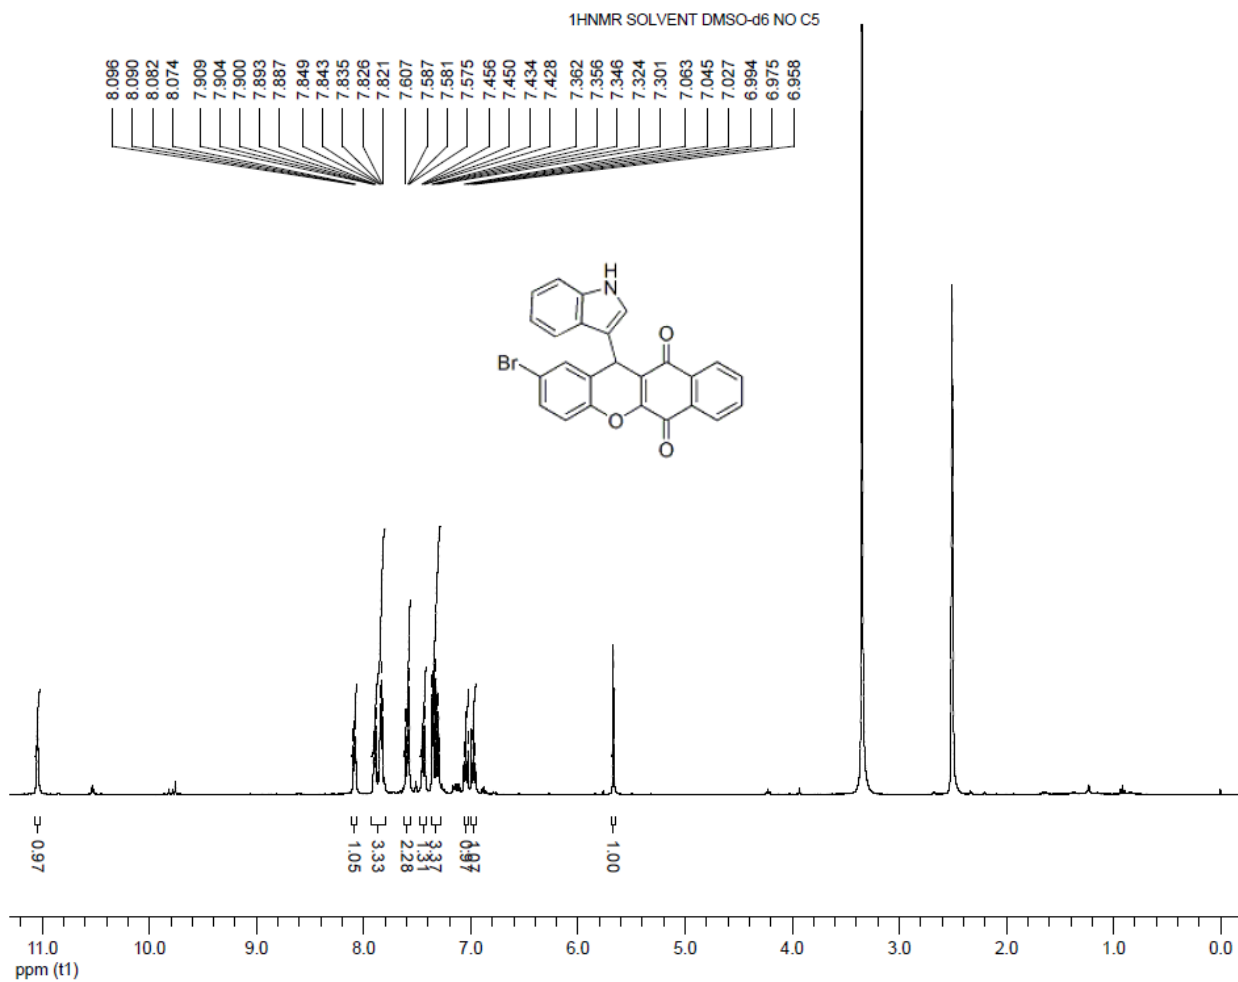

Figure S47 <sup>1</sup>H NMR of 4l

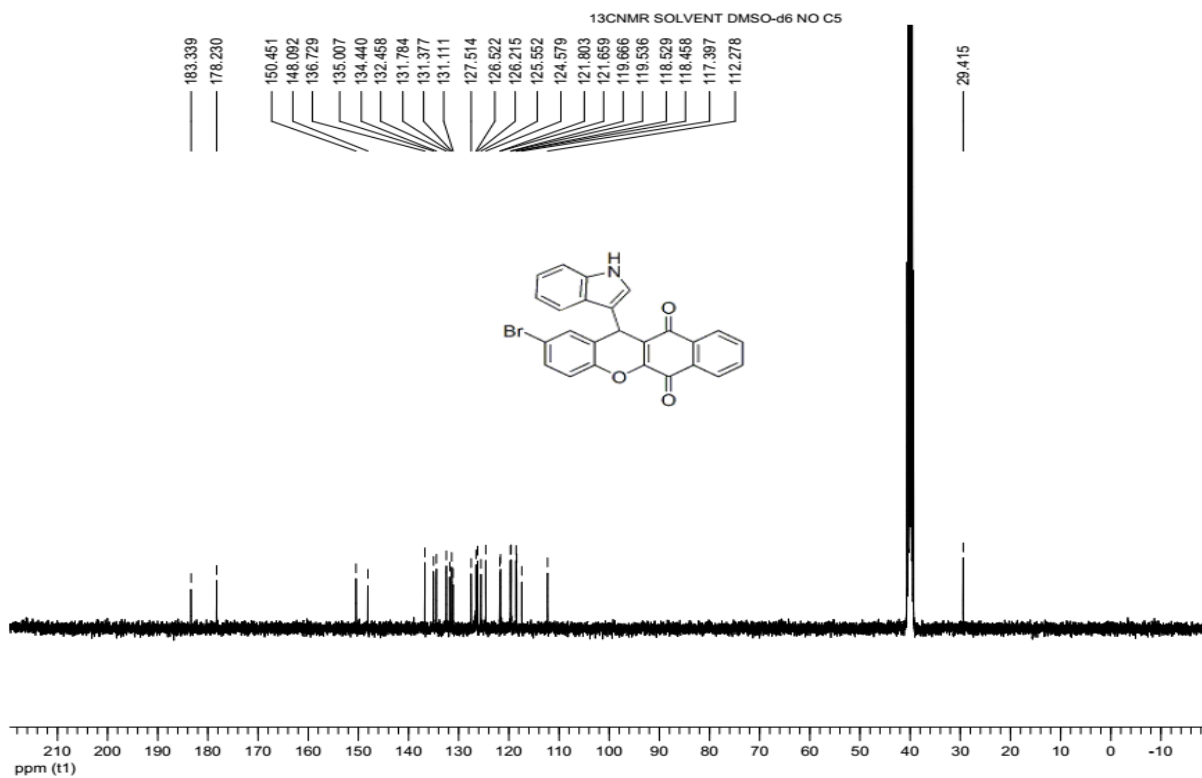

Figure S48 <sup>13</sup>C NMR of 4l

**Acquisition Parameter**

|             |            |                       |           |                  |           |
|-------------|------------|-----------------------|-----------|------------------|-----------|
| Source Type | ESI        | Ion Polarity          | Positive  | Set Nebulizer    | 0.3 Bar   |
| Focus       | Not active | Set Capillary         | 4500 V    | Set Dry Heater   | 180 °C    |
| Scan Begin  | 50 m/z     | Set End Plate Offset  | -500 V    | Set Dry Gas      | 4.0 l/min |
| Scan End    | 1000 m/z   | Set Collision Cell RF | 180.0 Vpp | Set Divert Valve | Waste     |

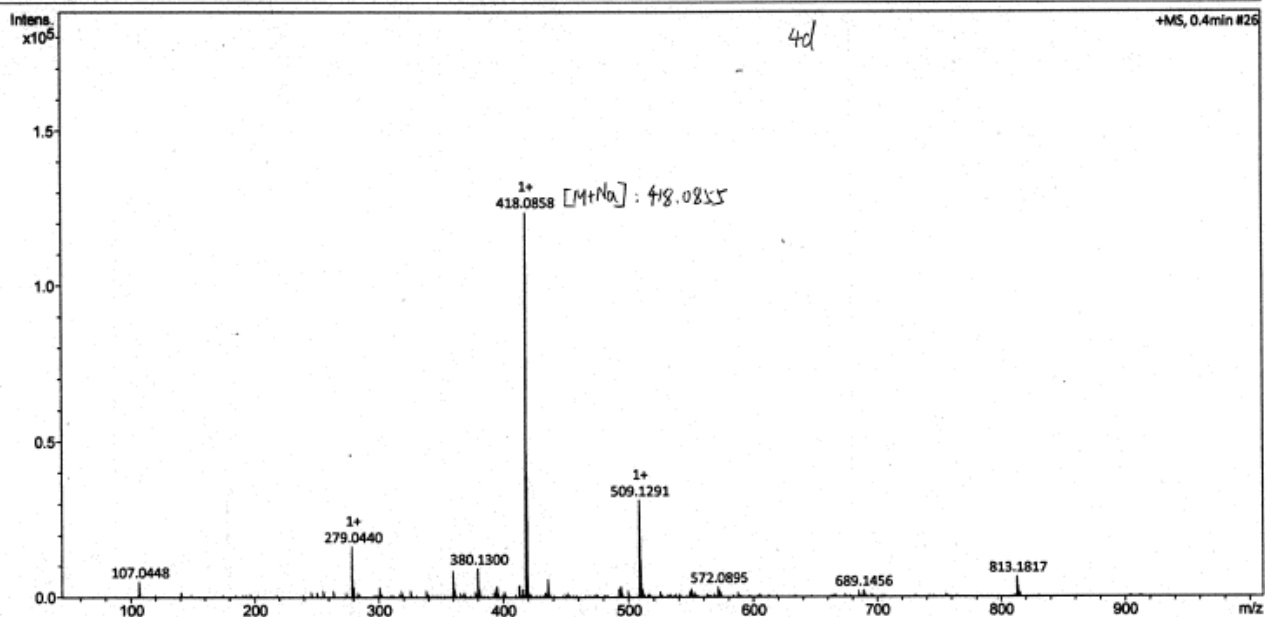**Figure S49 HRMS of 4m**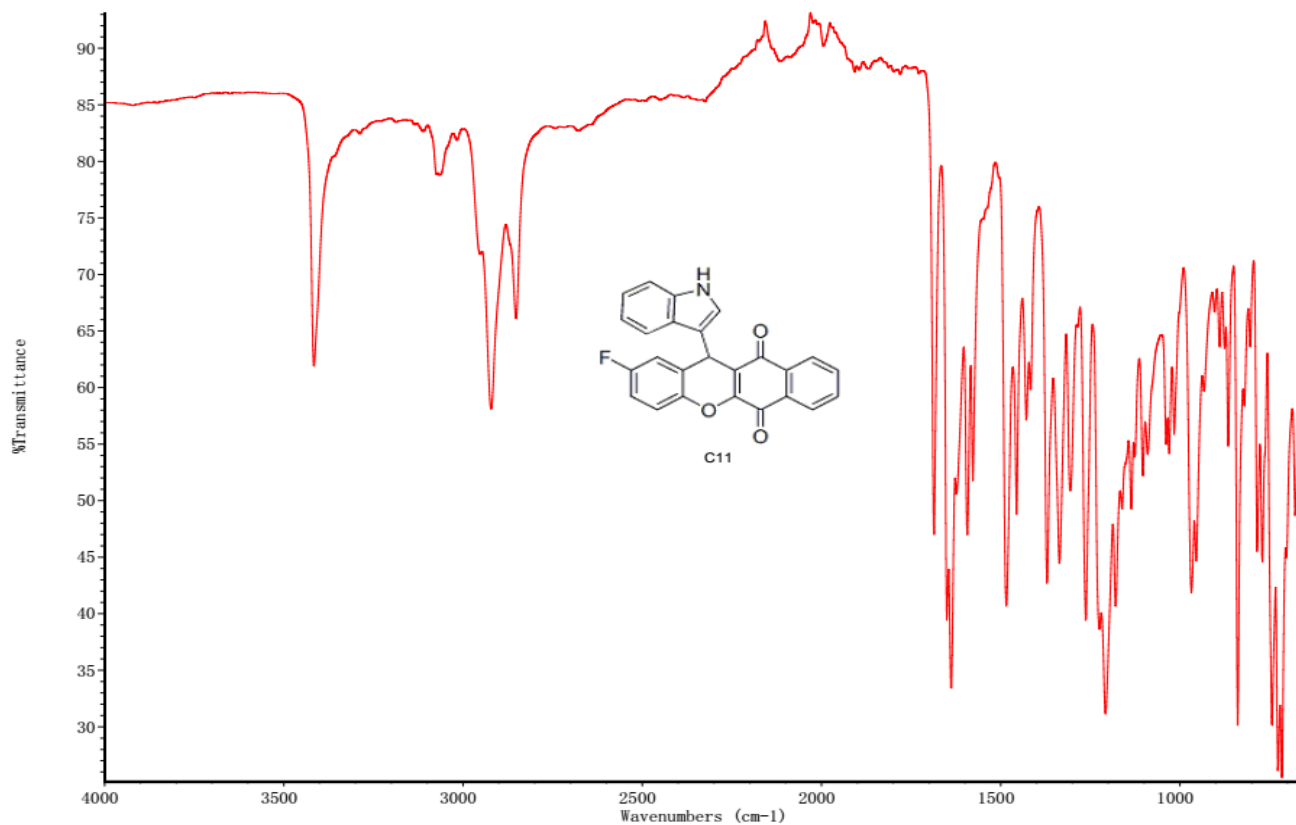**Figure S50 IR of 4m**



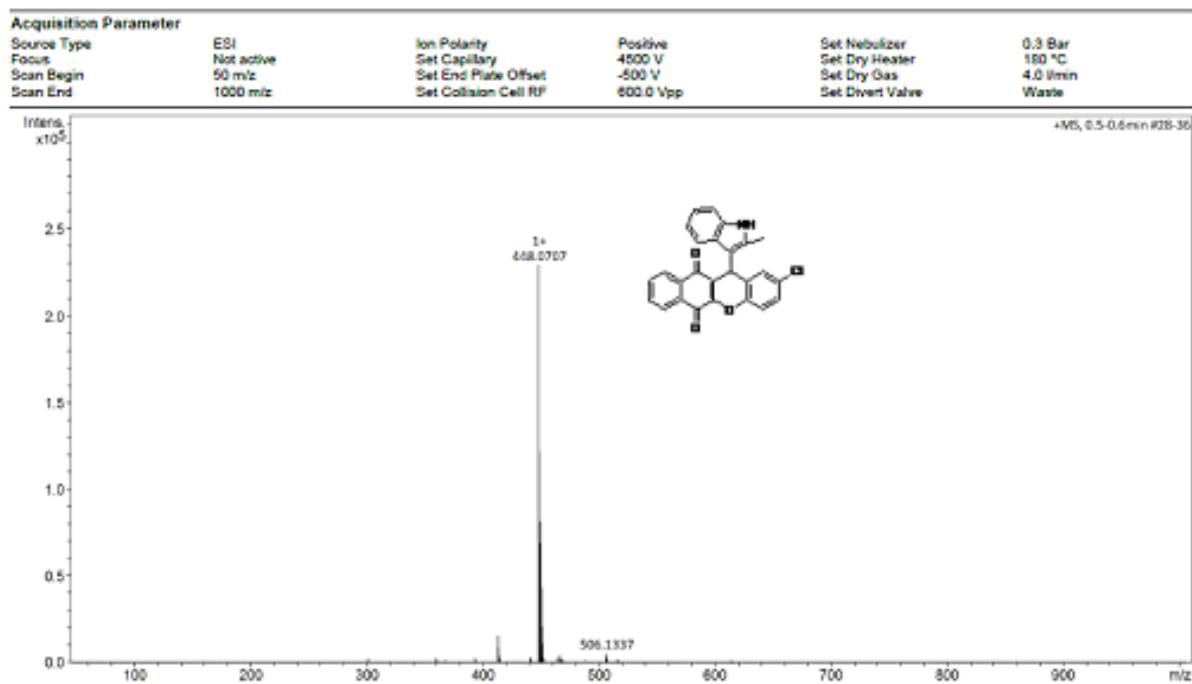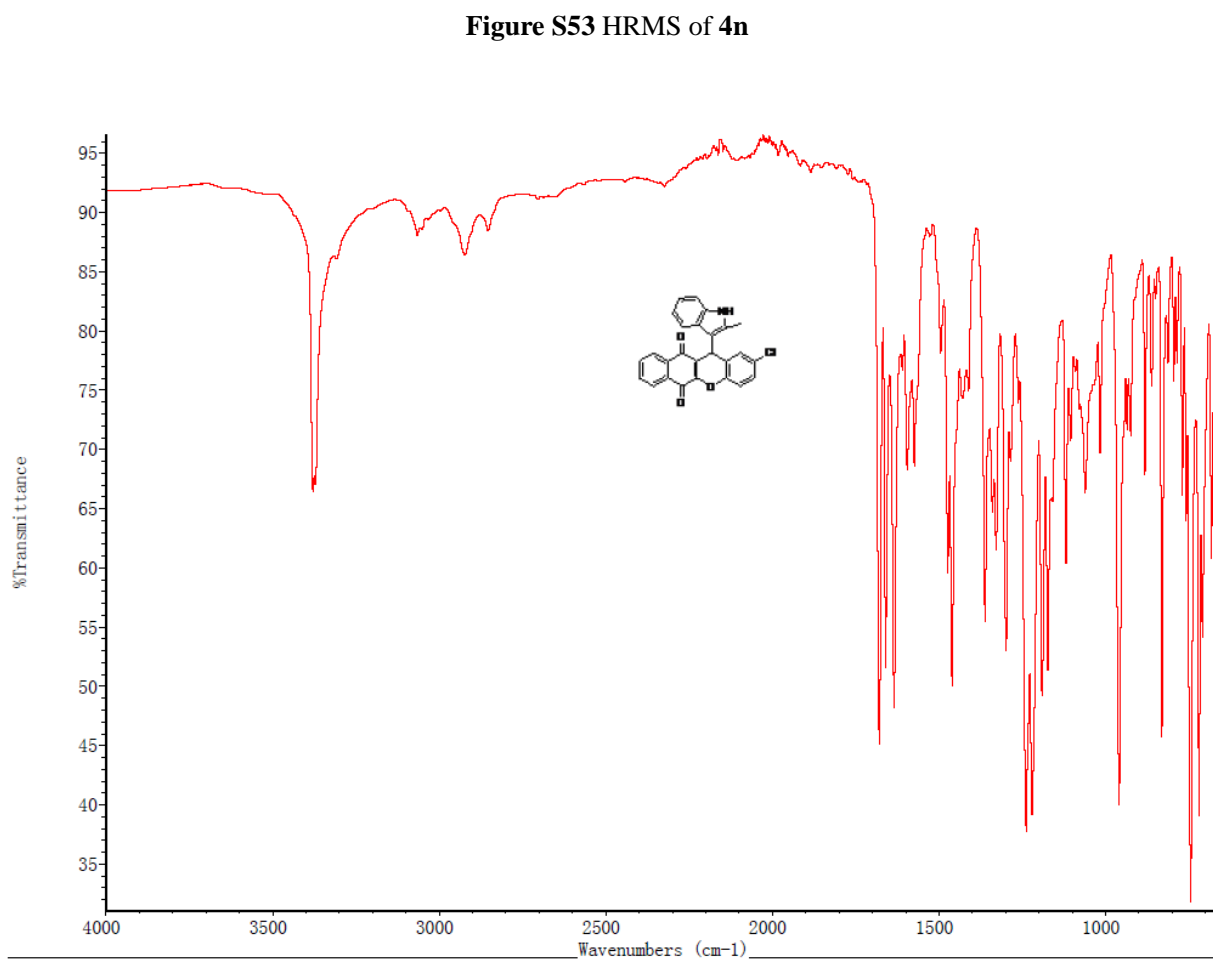



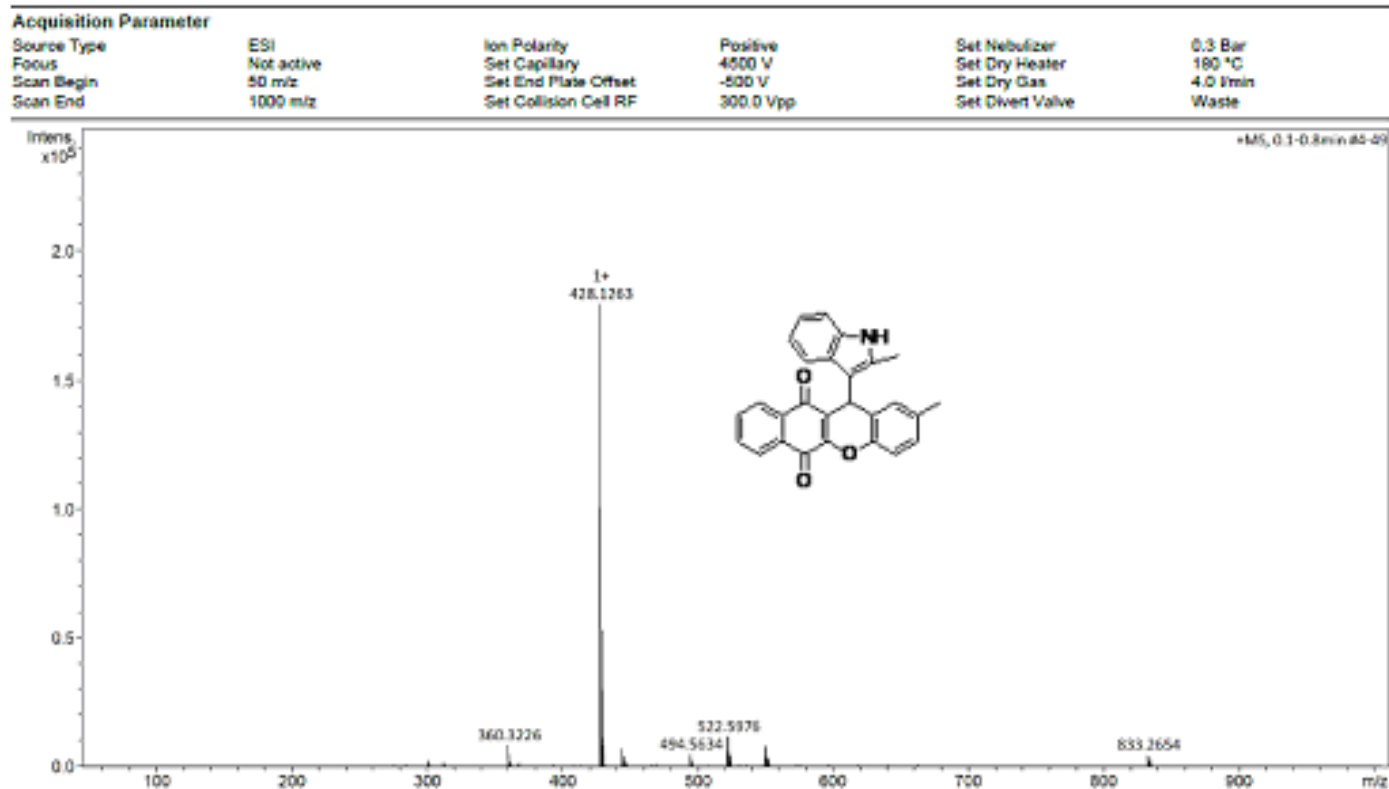

Figure S57 HRMS of **4o**

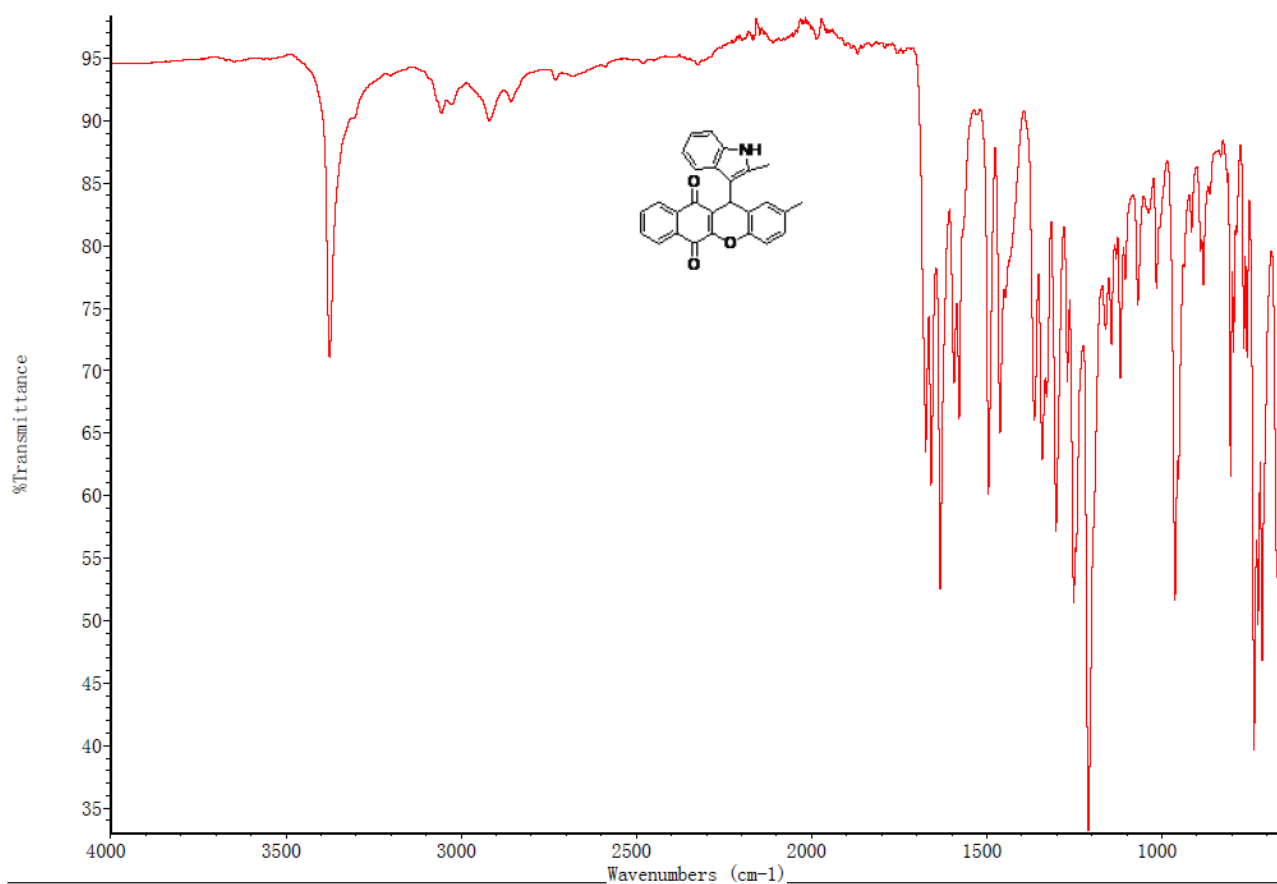

Figure S58 IR of **4o**

1H NMR SOLVENT DMSO-d6 NO D4X

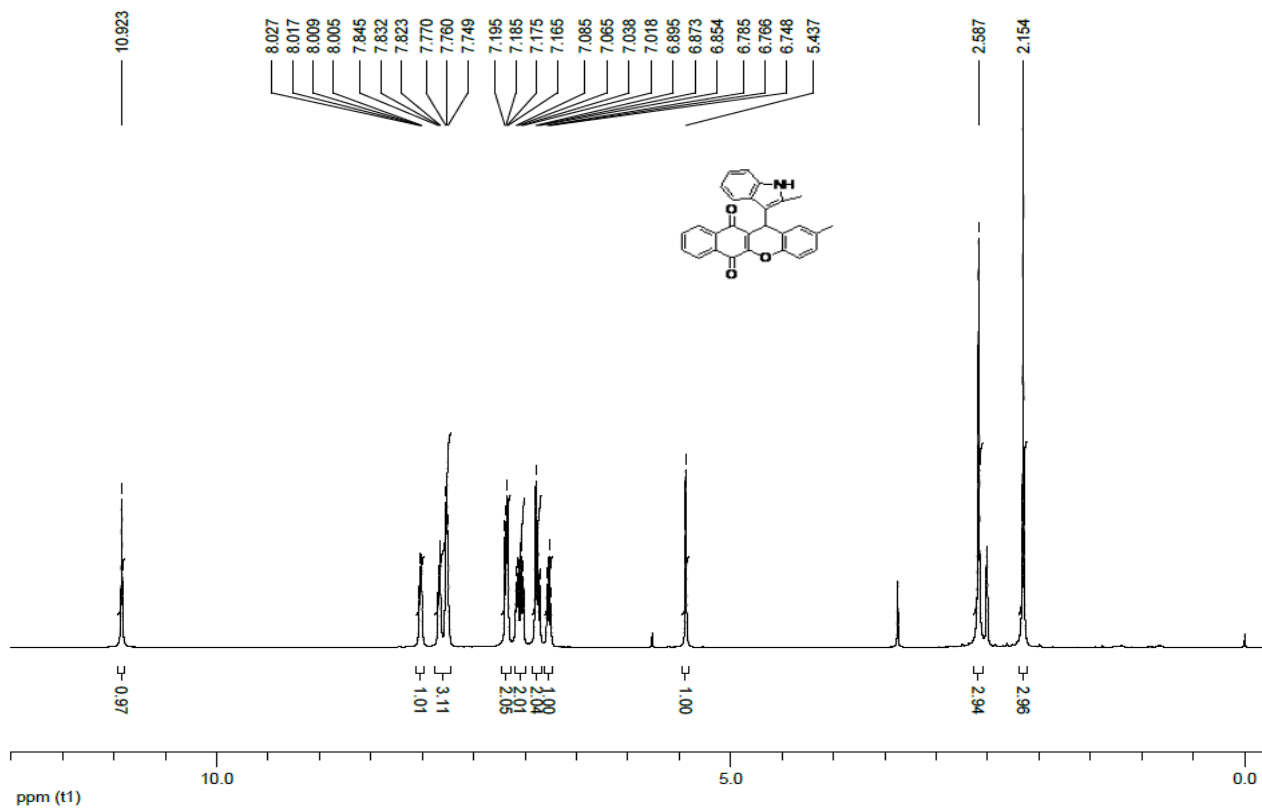

Figure S59 <sup>1</sup>H NMR of 4o

13C NMR SOLVENT DMSO-d6 NO D4X

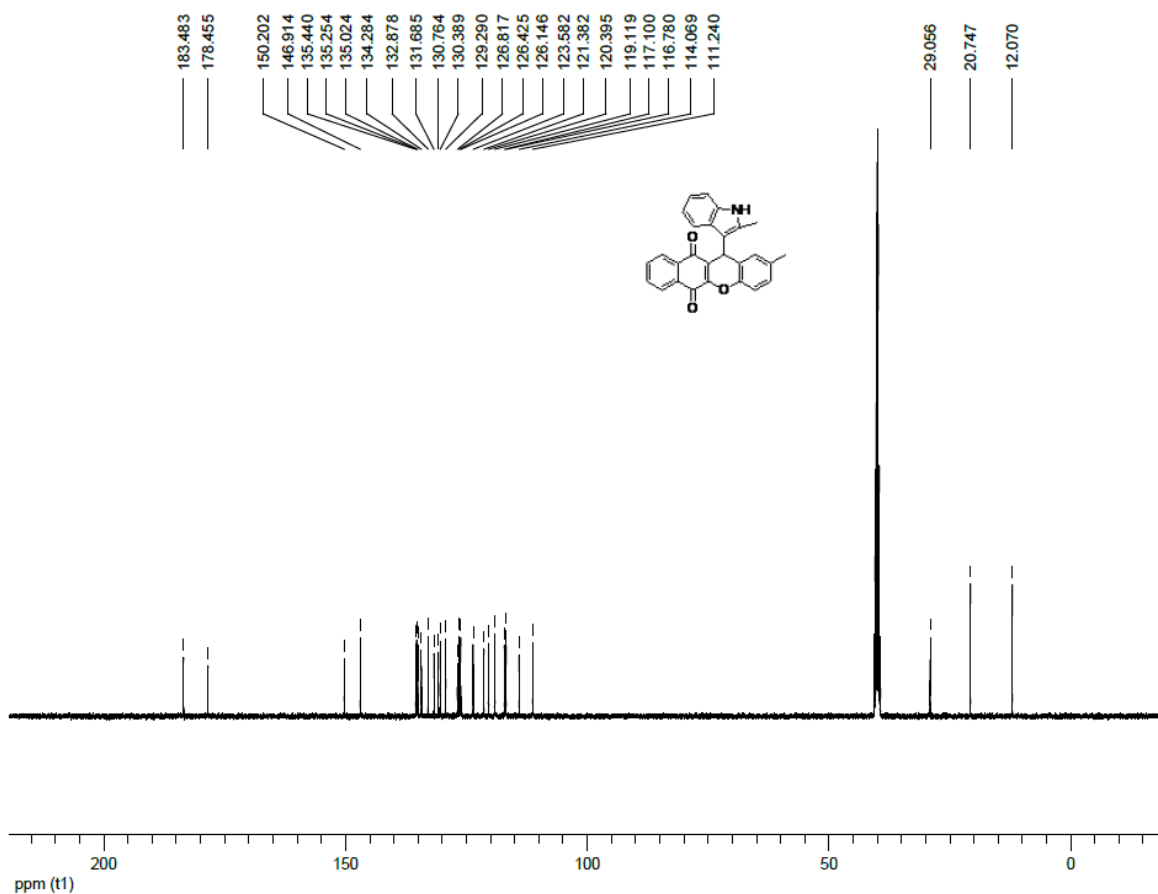

Figure S60 <sup>13</sup>C NMR of 4o

**Acquisition Parameter**

|             |            |                       |           |                  |           |
|-------------|------------|-----------------------|-----------|------------------|-----------|
| Source Type | ESI        | Ion Polarity          | Positive  | Set Nebulizer    | 0.3 Bar   |
| Focus       | Not active | Set Capillary         | 4500 V    | Set Dry Heater   | 180 °C    |
| Scan Begin  | 50 m/z     | Set End Plate Offset  | -500 V    | Set Dry Gas      | 4.0 l/min |
| Scan End    | 1000 m/z   | Set Collision Cell RF | 180.0 Vpp | Set Divert Valve | Waste     |

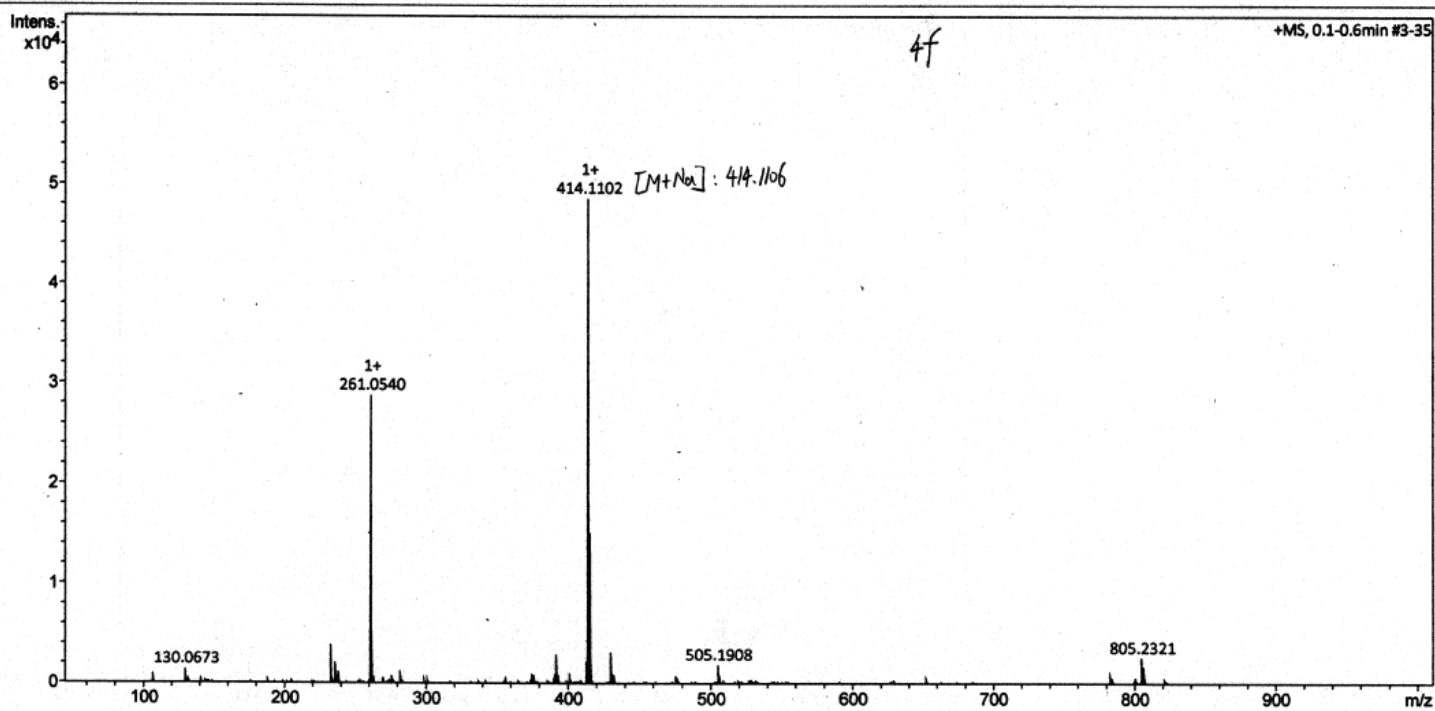**Figure S61 HRMS of 4p**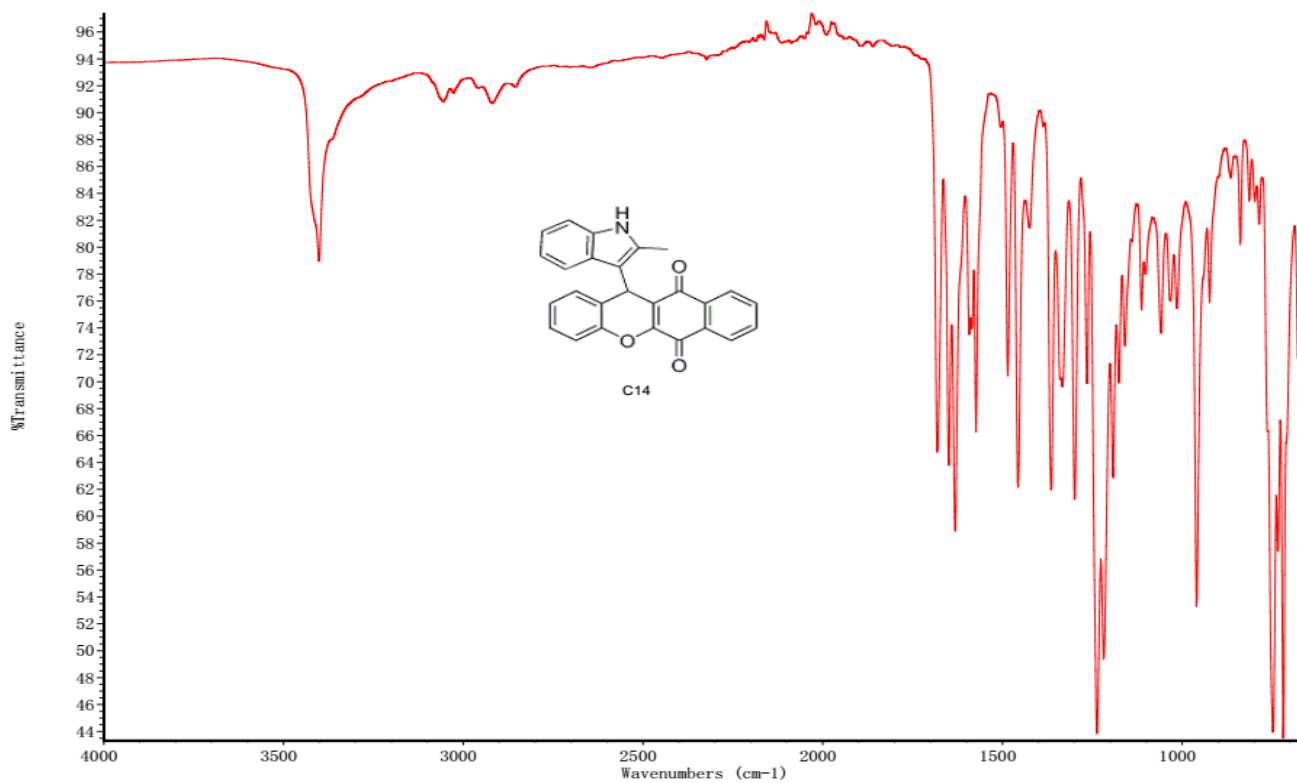**Figure S62 IR of 4p**



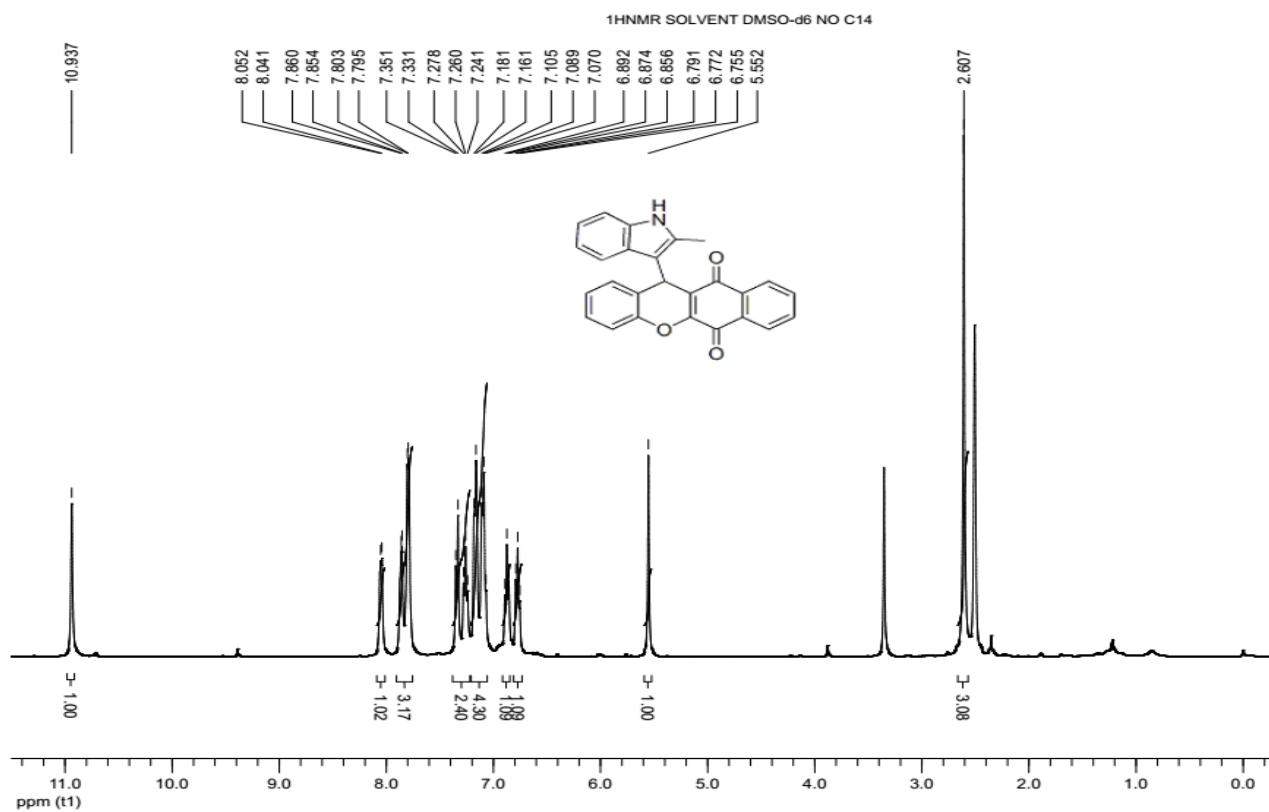

Figure S63  $^1\text{H}$  NMR of 4p

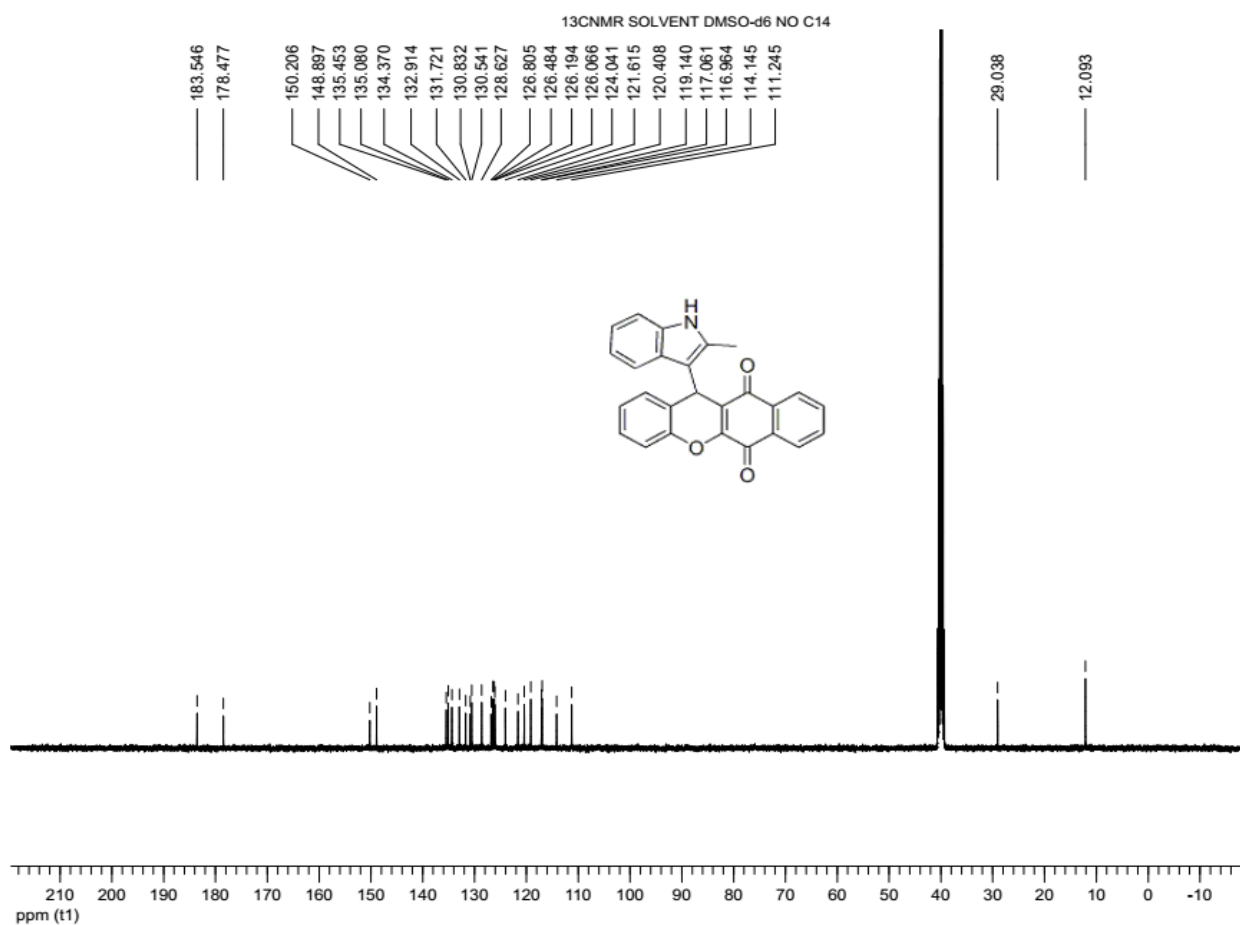

Figure S64  $^{13}\text{C}$  NMR of 4p

**Acquisition Parameter**

|             |            |                       |           |                  |           |
|-------------|------------|-----------------------|-----------|------------------|-----------|
| Source Type | ESI        | Ion Polarity          | Positive  | Set Nebulizer    | 0.3 Bar   |
| Focus       | Not active | Set Capillary         | 4500 V    | Set Dry Heater   | 180 °C    |
| Scan Begin  | 50 m/z     | Set End Plate Offset  | -500 V    | Set Dry Gas      | 4.0 l/min |
| Scan End    | 1000 m/z   | Set Collision Cell RF | 180.0 Vpp | Set Divert Valve | Waste     |

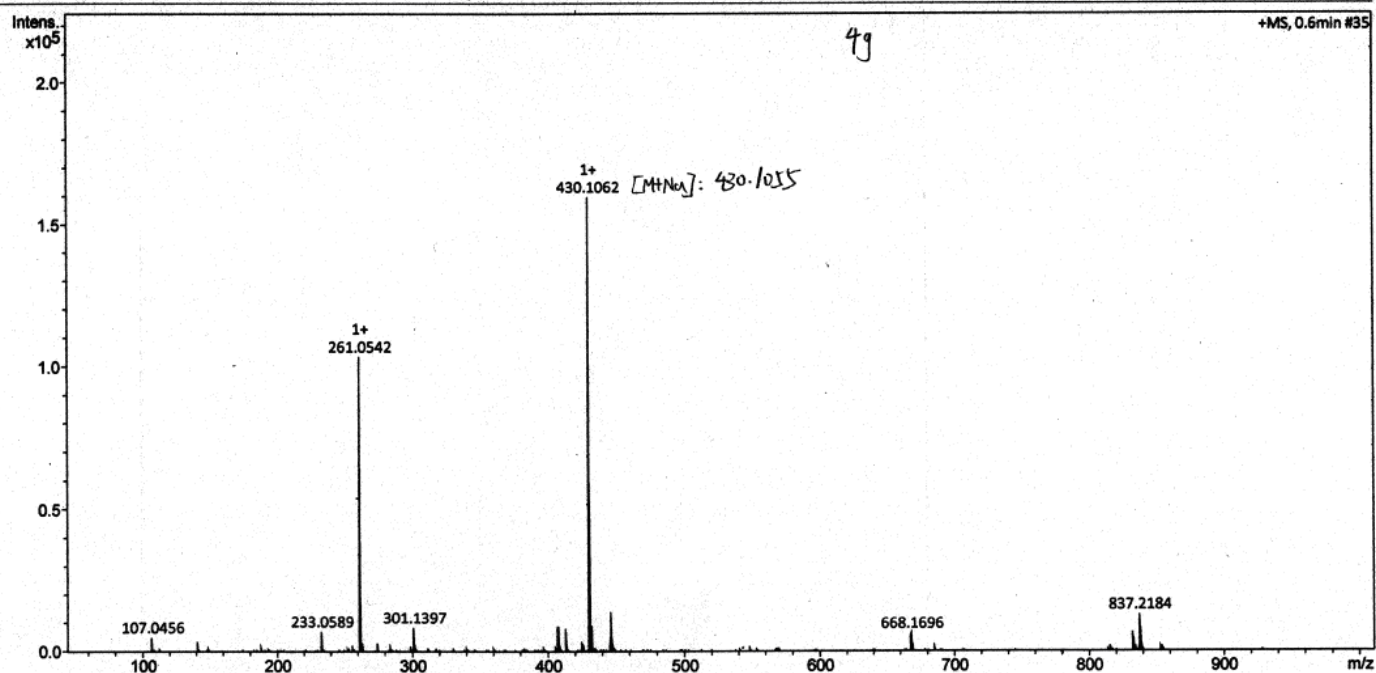**Figure S65 HMRS of 4q**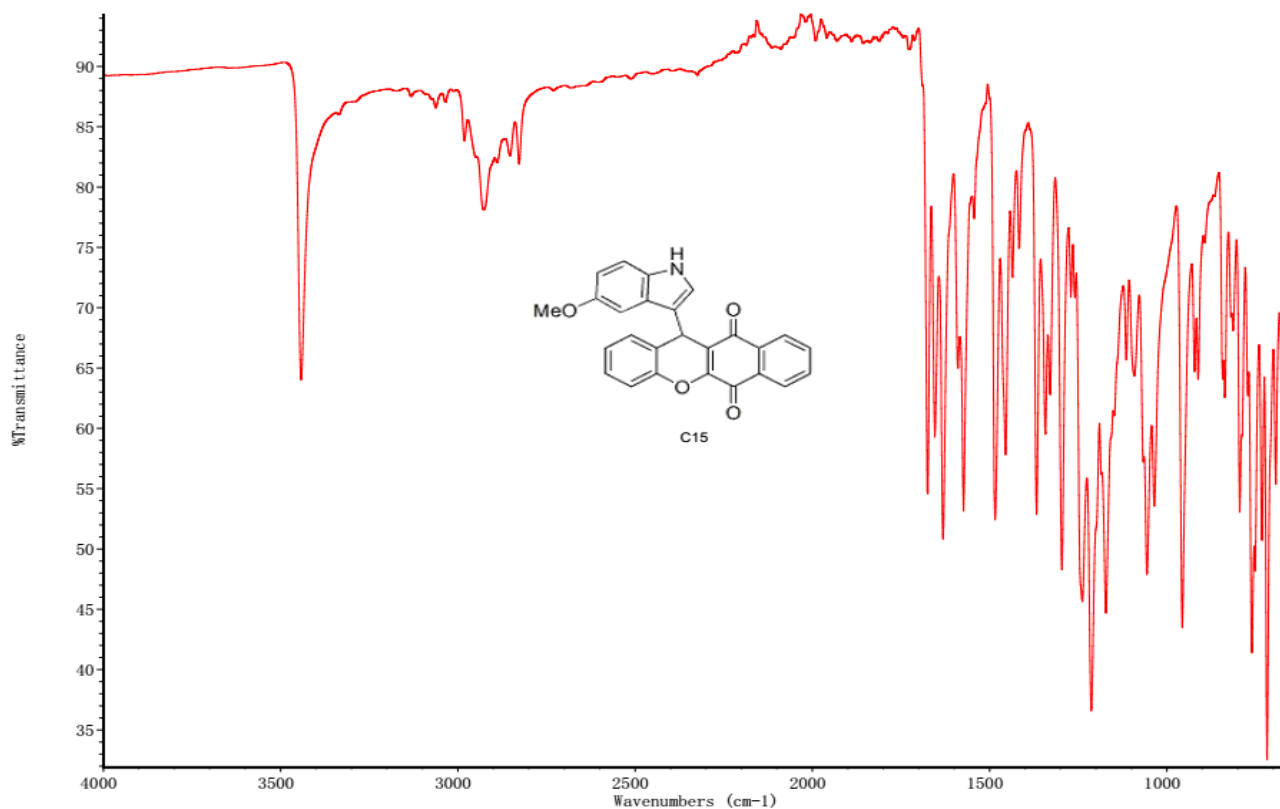**Figure S66 IR of 4q**



Acquisition Parameter

|             |            |                       |           |                  |          |
|-------------|------------|-----------------------|-----------|------------------|----------|
| Source Type | ESI        | Ion Polarity          | Positive  | Set Nebulizer    | 0.3 Bar  |
| Focus       | Not active | Set Capillary         | 4500 V    | Set Dry Heater   | 180 °C   |
| Scan Begin  | 50 m/z     | Set End Plate Offset  | -500 V    | Set Dry Gas      | 4.0 Vmin |
| Scan End    | 1000 m/z   | Set Collision Cell RF | 180.0 Vpp | Set Divert Valve | Waste    |

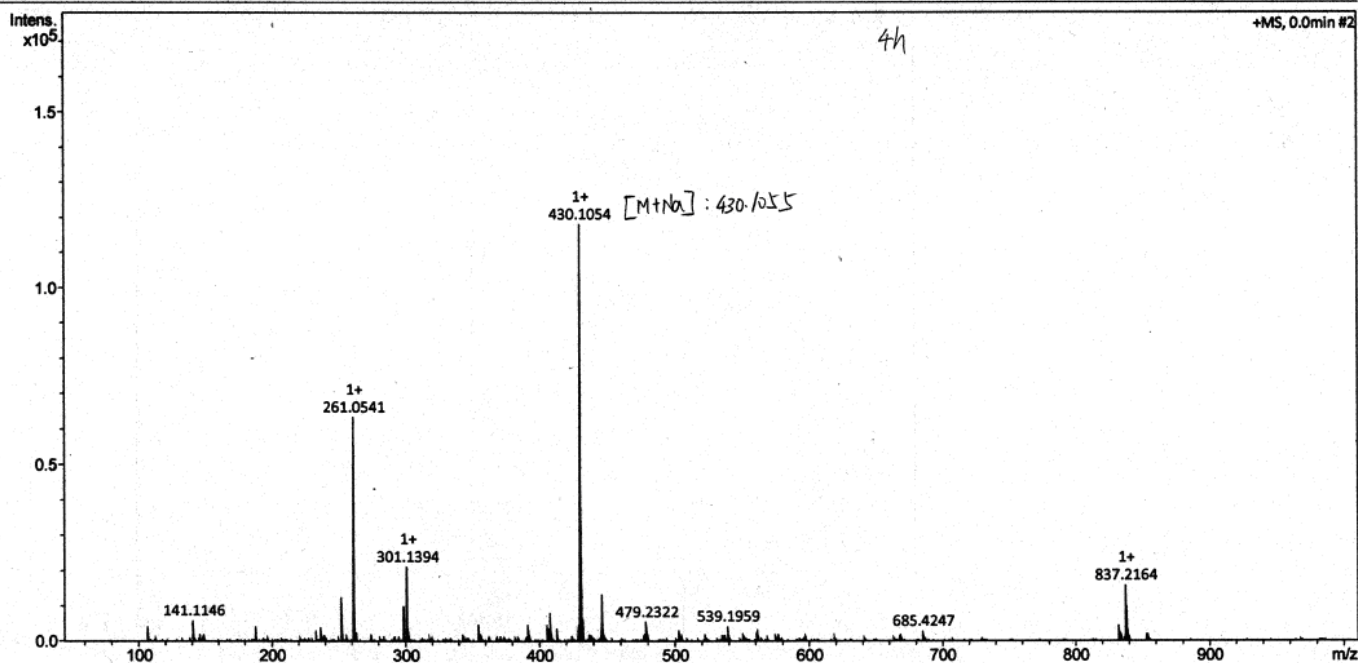

Figure S69 HRMS of 4r

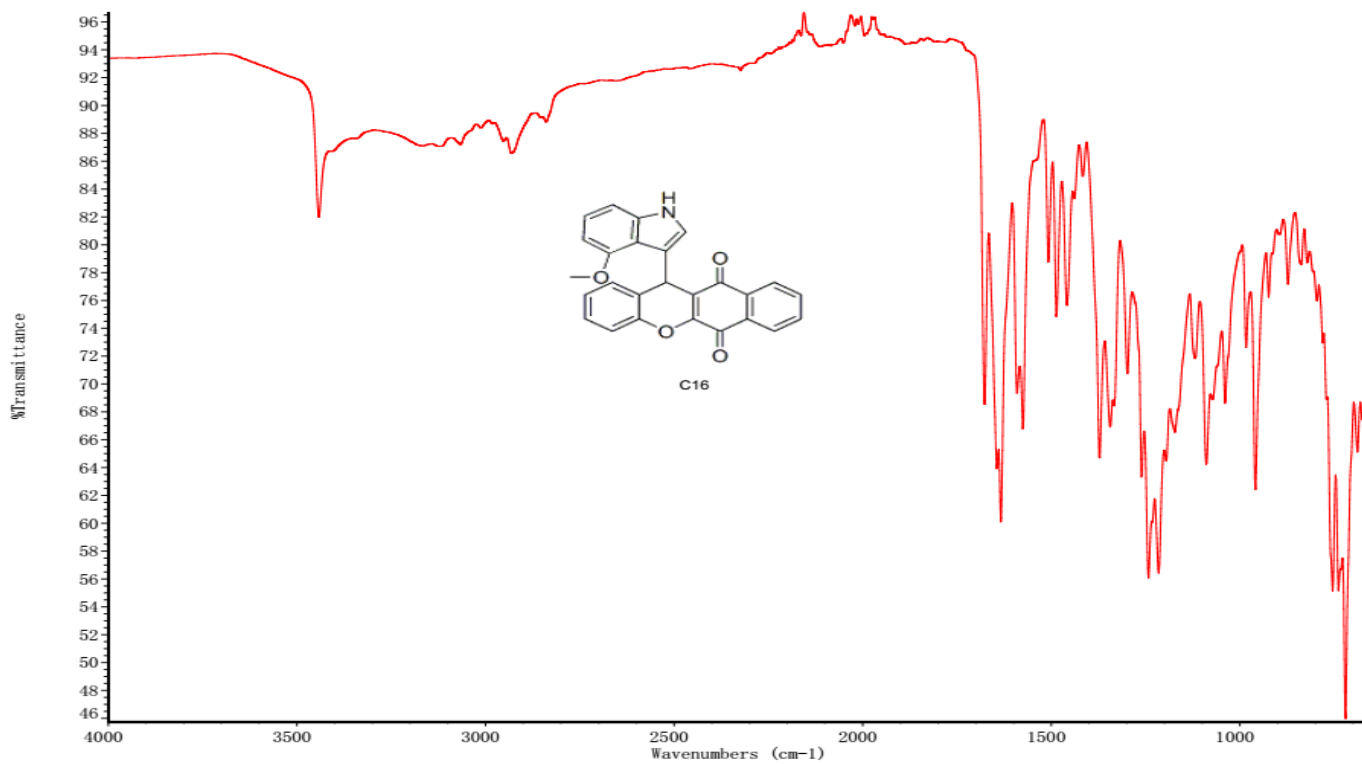

Figure S70 IR of 4r

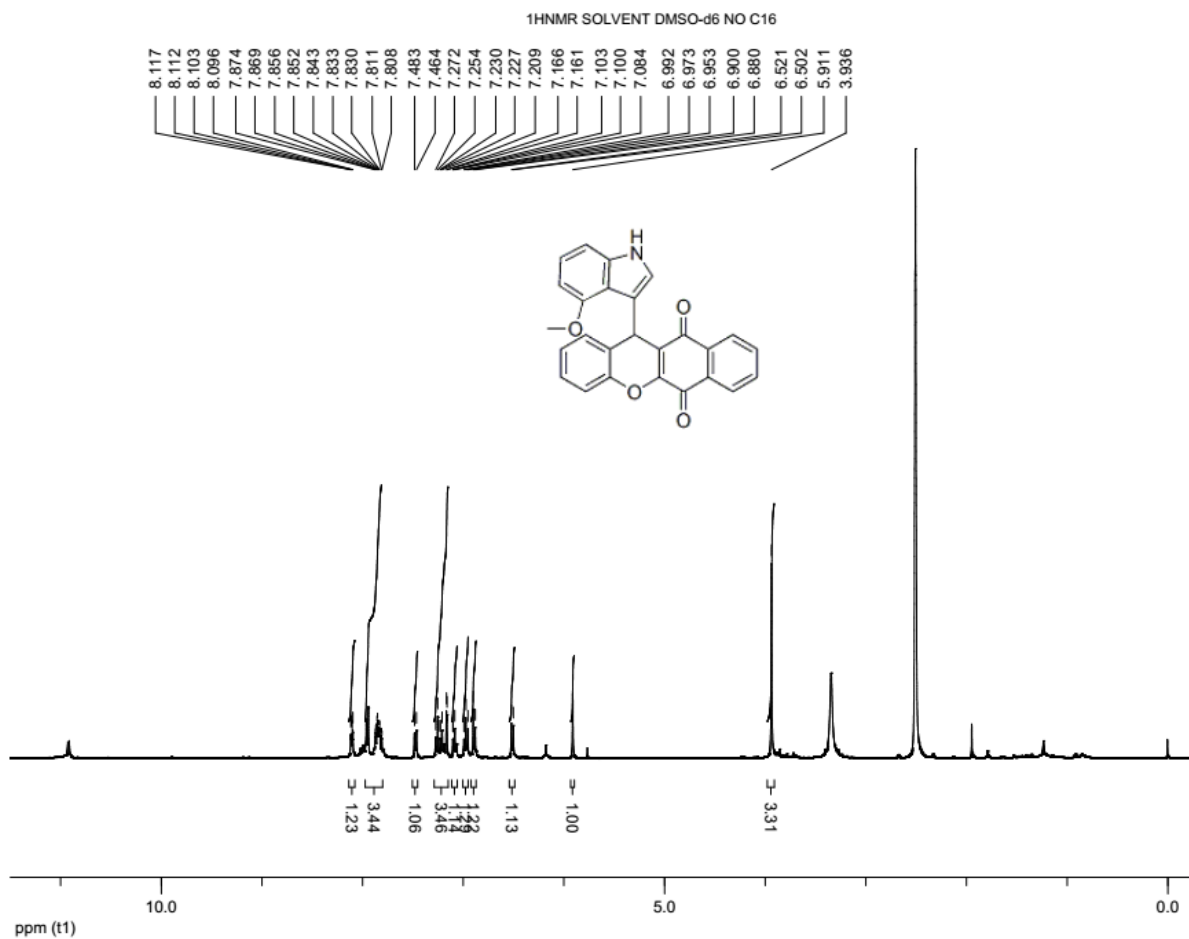

Figure S71 <sup>1</sup>H NMR of 4r

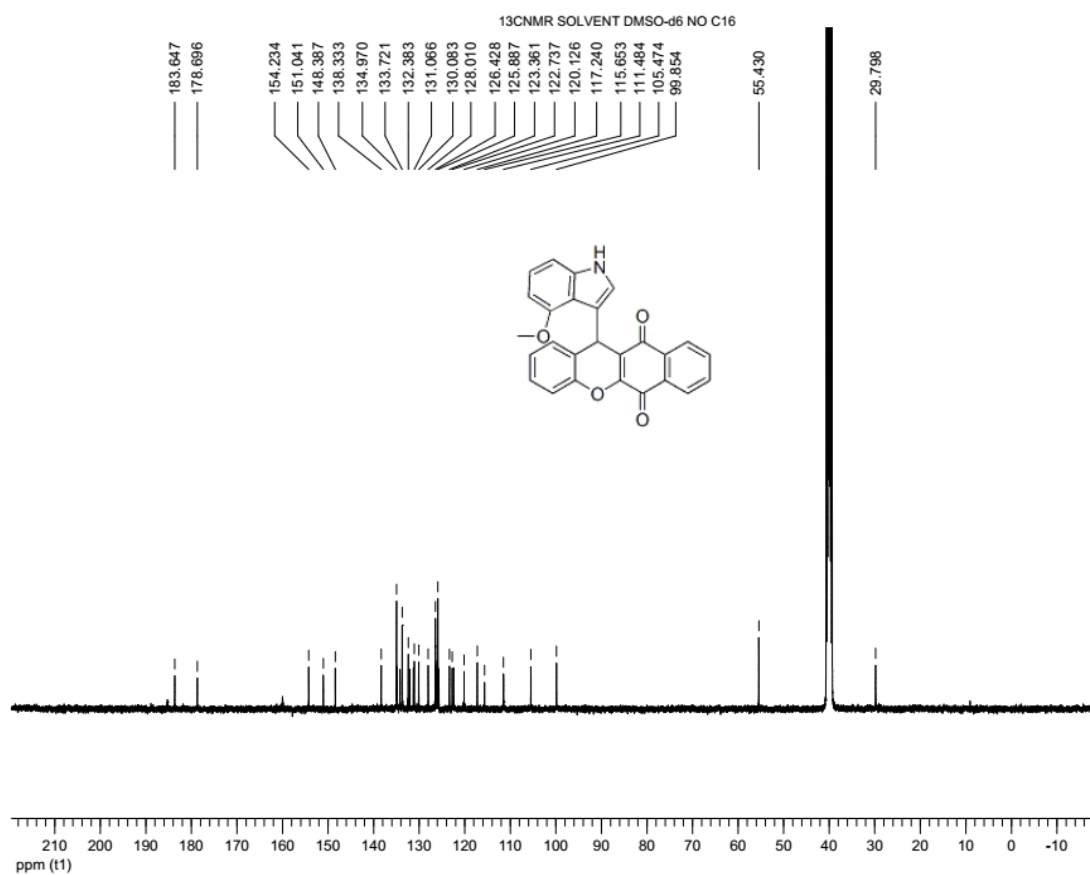

Figure S72 <sup>13</sup>C NMR of 4r

**Acquisition Parameter**

Source Type

ESI

Focus

Not active

Scan Begin

50 m/z

Scan End

1000 m/z

Ion Polarity

Set Capillary

Set End Plate Offset

Set Collision Cell RF

Positive

4500 V

-500 V

180.0 Vpp

Set Nebulizer

Set Dry Heater

Set Dry Gas

Set Divert Valve

0.3 Bar

180 °C

4.0 l/min

Waste

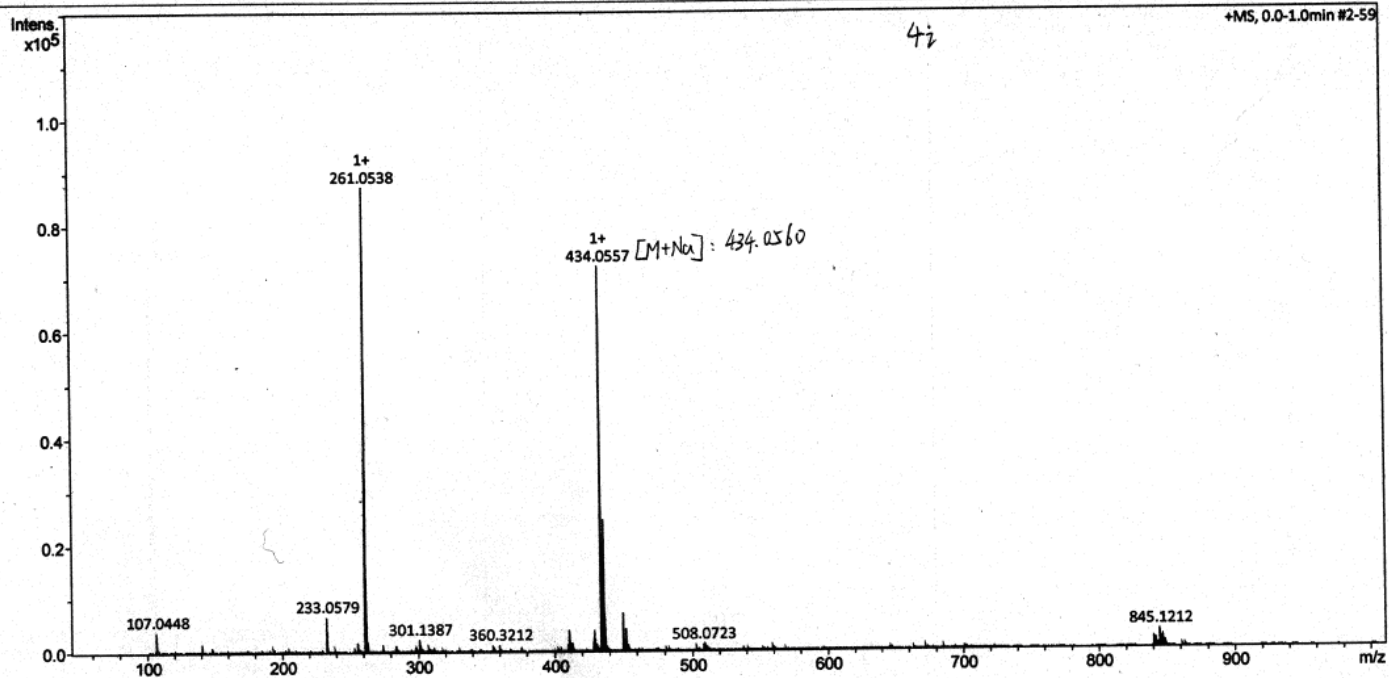**Figure S73** HMRS of 4s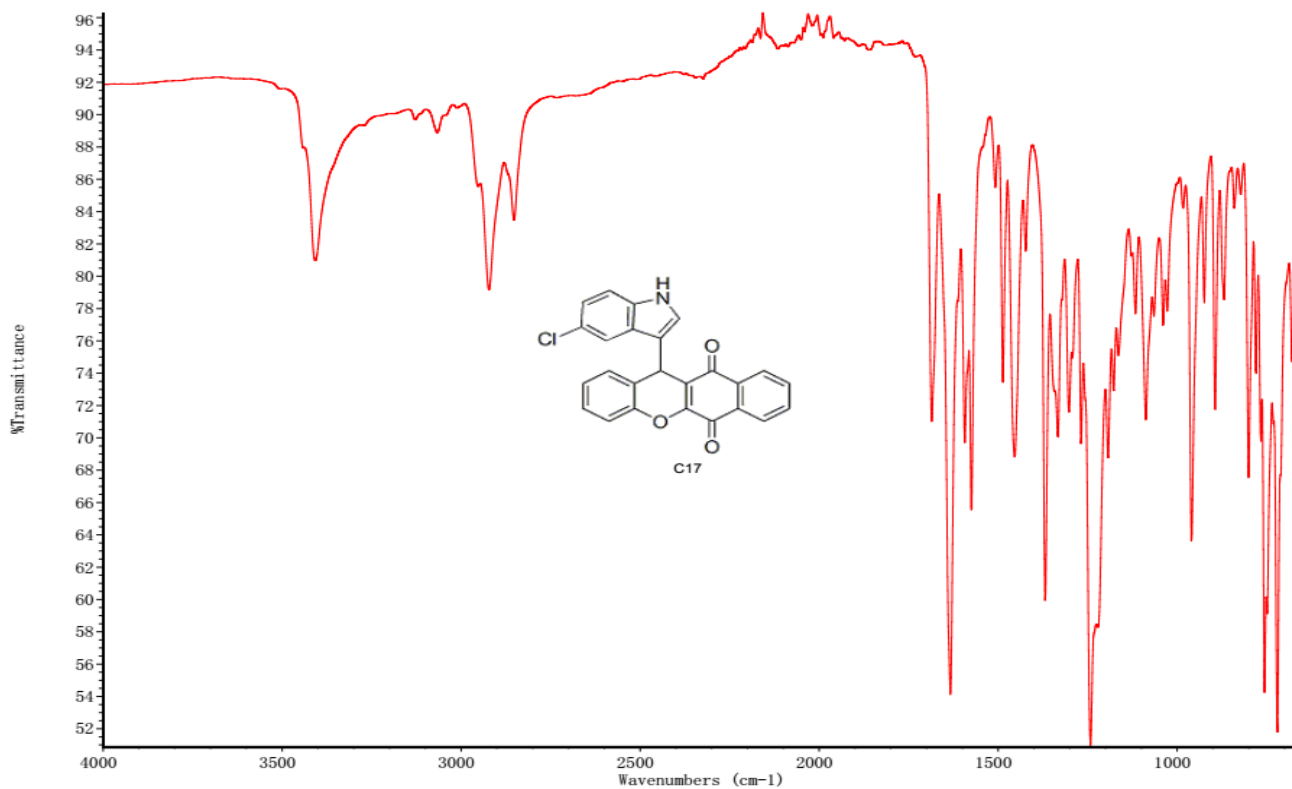**Figure S74** IR of 4s

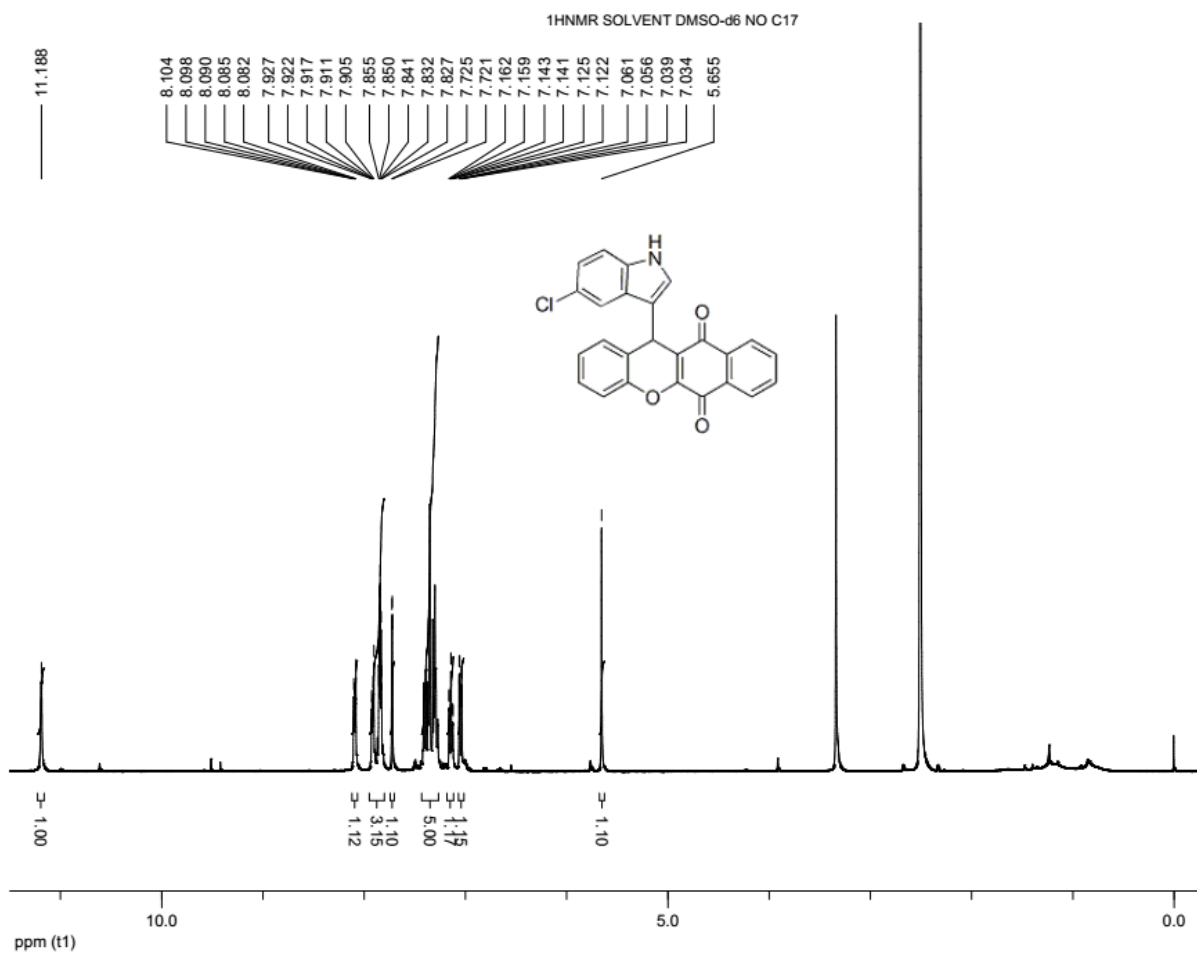

Figure S75 <sup>1</sup>H NMR of 4s

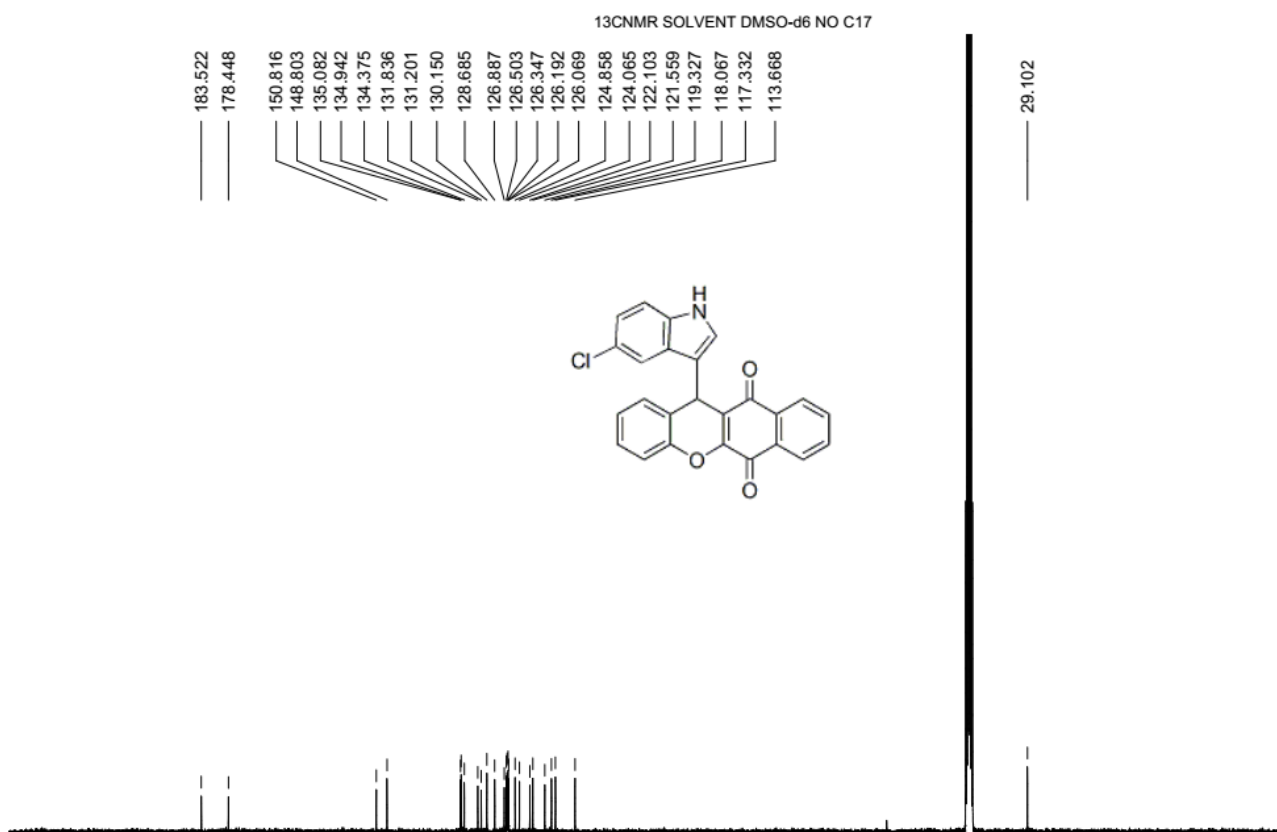

Figure S76 <sup>13</sup>C NMR of 4s
